# Supplementary material for: Are National Cancer Control Indicators for patient experiences being met in regional and remote Australia? A cross-sectional study of cancer survivors who travelled for treatment
Source: PubMed Central journal article supplement — BMJ Open. 2021 Feb 22;11(2):e042507. doi: 10.1136/bmjopen-2020-042507 (PMC7903096; doi:10.1136/bmjopen-2020-042507), 2021-02-22
Supplement: bmjopen-2020-042507.draft_revisions.pdf [file bmjopen-2020-042507.draft_revisions.pdf]

# BMJ Open

BMJ Open is committed to open peer review. As part of this commitment we make the peer review history of every article we publish publicly available.

When an article is published we post the peer reviewers' comments and the authors' responses online. We also post the versions of the paper that were used during peer review. These are the versions that the peer review comments apply to.

The versions of the paper that follow are the versions that were submitted during the peer review process. They are not the versions of record or the final published versions. They should not be cited or distributed as the published version of this manuscript.

BMJ Open is an open access journal and the full, final, typeset and author-corrected version of record of the manuscript is available on our site with no access controls, subscription charges or pay-per-view fees (<http://bmjopen.bmj.com>).

If you have any questions on BMJ Open's open peer review process please email [info.bmjopen@bmj.com](mailto:info.bmjopen@bmj.com)

# BMJ Open

## Applying National Cancer Control Indicators to Regional and Remote Cancer Patients' Experiences

|                               |                                                                                                                                                                                                                                                                                                                                                                                                                                                                                                                                                                                                                                                                                                                                                                                            |
|-------------------------------|--------------------------------------------------------------------------------------------------------------------------------------------------------------------------------------------------------------------------------------------------------------------------------------------------------------------------------------------------------------------------------------------------------------------------------------------------------------------------------------------------------------------------------------------------------------------------------------------------------------------------------------------------------------------------------------------------------------------------------------------------------------------------------------------|
| Journal:                      | <i>BMJ Open</i>                                                                                                                                                                                                                                                                                                                                                                                                                                                                                                                                                                                                                                                                                                                                                                            |
| Manuscript ID                 | bmjopen-2020-042507                                                                                                                                                                                                                                                                                                                                                                                                                                                                                                                                                                                                                                                                                                                                                                        |
| Article Type:                 | Original research                                                                                                                                                                                                                                                                                                                                                                                                                                                                                                                                                                                                                                                                                                                                                                          |
| Date Submitted by the Author: | 07-Jul-2020                                                                                                                                                                                                                                                                                                                                                                                                                                                                                                                                                                                                                                                                                                                                                                                |
| Complete List of Authors:     | Dunn, Jeff; Prostate Cancer Foundation of Australia; University of Southern Queensland - Springfield Campus, Goodwin, Belinda; Cancer Council Queensland, ; University of Southern Queensland - Springfield Campus, Aitken, Joanne; Cancer Council Queensland, Cancer Research Centre March, Sonja; University of Southern Queensland, School of Psychology and Counselling; University of Southern Queensland Crawford-Williams, Fiona; University of Southern Queensland Ireland, Michael; University of Southern Queensland, Psychology and Counselling<br>Ralph, Nicholas; University of Southern Queensland<br>Zajdlewicz, Leah; Cancer Council Queensland<br>Rowe, Arlen; University of Southern Queensland<br>Chambers, Suzanne; University of Technology Sydney Faculty of Health, |
| Keywords:                     | HEALTH SERVICES ADMINISTRATION & MANAGEMENT, Quality in health care < HEALTH SERVICES ADMINISTRATION & MANAGEMENT, Adult oncology < ONCOLOGY, Organisation of health services < HEALTH SERVICES ADMINISTRATION & MANAGEMENT                                                                                                                                                                                                                                                                                                                                                                                                                                                                                                                                                                |
|                               |                                                                                                                                                                                                                                                                                                                                                                                                                                                                                                                                                                                                                                                                                                                                                                                            |

SCHOLARONE™  
Manuscripts

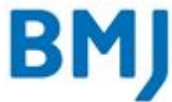

I, the Submitting Author has the right to grant and does grant on behalf of all authors of the Work (as defined in the below author licence), an exclusive licence and/or a non-exclusive licence for contributions from authors who are: i) UK Crown employees; ii) where BMJ has agreed a CC-BY licence shall apply, and/or iii) in accordance with the terms applicable for US Federal Government officers or employees acting as part of their official duties; on a worldwide, perpetual, irrevocable, royalty-free basis to BMJ Publishing Group Ltd ("BMJ") its licensees and where the relevant Journal is co-owned by BMJ to the co-owners of the Journal, to publish the Work in this journal and any other BMJ products and to exploit all rights, as set out in our [licence](#).

The Submitting Author accepts and understands that any supply made under these terms is made by BMJ to the Submitting Author unless you are acting as an employee on behalf of your employer or a postgraduate student of an affiliated institution which is paying any applicable article publishing charge ("APC") for Open Access articles. Where the Submitting Author wishes to make the Work available on an Open Access basis (and intends to pay the relevant APC), the terms of reuse of such Open Access shall be governed by a Creative Commons licence – details of these licences and which [Creative Commons](#) licence will apply to this Work are set out in our licence referred to above.

Other than as permitted in any relevant BMJ Author's Self Archiving Policies, I confirm this Work has not been accepted for publication elsewhere, is not being considered for publication elsewhere and does not duplicate material already published. I confirm all authors consent to publication of this Work and authorise the granting of this licence.

# Applying National Cancer Control Indicators to Regional and Remote Cancer Patients' Experiences

Jeff Dunn<sup>a-e</sup>, Belinda C. Goodwin<sup>\*, a,b</sup>, Joanne F. Aitken<sup>a-c,f</sup>, Sonja March<sup>b,g</sup>, Fiona Crawford-Williams<sup>b</sup>, Michael J. Ireland<sup>b,g</sup>, Nicholas Ralph<sup>b,e</sup>, Leah Zajdlewicz<sup>a</sup>, Arlen Rowe<sup>b,g</sup>, and Suzanne K. Chambers<sup>b,c,e,h</sup>

\*Corresponding author:  
Cancer Council Queensland  
553 Gregory Terrace, Fortitude Valley, QLD, 4006  
[belindagoodwin@cancerqld.org.au](mailto:belindagoodwin@cancerqld.org.au)

<sup>a</sup> Cancer Council Queensland, Brisbane, Australia

<sup>b</sup> Centre for Health Research, University of Southern Queensland, Springfield, QLD, Australia

<sup>c</sup> Menzies Health Institute Queensland, Griffith University, Mt Gravatt, QLD, Australia

<sup>d</sup> Prostate Cancer Foundation of Australia, Sydney, NSW, Australia

<sup>e</sup> Faculty of Health, University of Technology Sydney, NSW, Australia

<sup>f</sup> School of Public Health, The University of Queensland, Springfield, QLD, Australia

<sup>g</sup> School of Psychology and Counselling, University of Southern Queensland, Springfield, QLD, Australia

<sup>h</sup> Exercise Medicine Research Institute, Edith Cowan University, Perth, Australia

## Acknowledgements

We would like to thank the research participants for taking part in the study and the Cancer Council Queensland volunteers and lodge staff who assisted with recruitment and data collection and entry. We also acknowledged the efforts of research team members Anna Stiller (Pamo Lozang) and Zina Ndugwa in assisting with project and data management.

**Word count:** 4109

## Declarations

## Conflict of interest

The authors declare that they have no conflict of interest.

## Funding

The study was funded by The University of Southern Queensland and Cancer Council Queensland.

## Ethical Approval

The questionnaire and methodology for this study was approved by the Human Research Ethics committee of the University of Southern Queensland (Ethics approval number: ref. H17REA152).

## Consent to participate

Informed consent was obtained from all individual participants included in the study.

## Data availability statement

The data that support the findings of this study are available from the corresponding author upon reasonable request.

## Author Contribution Statement

All authors contributed to the study conception and design. Material preparation and data collection were conducted by Belinda Goodwin, Fiona Crawford-Williams, Arlen Rowe, and Leah Zajdlewicz and analyses were performed by Belinda Goodwin and Michael Ireland. The first draft of the manuscript was written by Jeff Dunn and Suzanne Chambers and all authors provided substantial contributions in revising the manuscript. All authors read and approved the final manuscript.

## ABSTRACT

**Objectives:** To examine the health services experience of cancer patients from regional and remote Australia using the Australian National Cancer Control Indicators (NCCI) guidelines as an assessment framework.

**Design:** Cross-sectional.

**Setting:** Queensland non-for-profit cancer accommodation lodges.

**Participants:** Participants were cancer patients who travelled for treatment from rural and remote Queensland to major urban centres ( $n=518$ ; age  $M = 64.6$ ,  $SD = 11.18$ ).

**Outcome measures:** Assessments included NCCI patient indicators, quality of life (QoL), psychological distress and unmet supportive care needs.

**Results:** The frequency at which NCCI indicators were met ranged from 37.5% for receiving an assessment and care plan to 97.3% for understanding explanations about diagnosis.

Middle school educated participants were more likely than those with senior level education or higher to receive an assessment and care plan ( $OR = 1.90$ ,  $CI = 1.23 - 2.91$ ) and to report having their views on treatment taken into account ( $OR = 2.22$ ,  $CI = 1.49 - 3.33$ ). Patients with breast or prostate cancer reported better communication and patient involvement and information and services provision ( $r = p < .001$ ) compared to those with skin and head and neck cancer. When compared to information and service provision, communication and patient involvement showed stronger positive associations with QoL ( $z = 2.03$ ,  $p = .042$ ), psychosocial ( $z = 2.05$ ,  $p = .040$ ), and patient care ( $z = 2.00$ ,  $p = .046$ ) outcomes.

**Conclusion:** The patient care experience varies across the NCCI indicators by sociodemographic and clinical factors that likely reflects health care system biases. Perceptions about communication and involvement appear most critical for optimal outcomes and should be a priority action area for cancer control.

1  
2  
3 **Keywords:** cancer; health service; information; communication; patient experiences; cancer  
4  
5 control.

6  
7  
8 **Strengths and limitations of this study**  
9

- 10  
11  
12  
13  
14  
15  
16  
17  
18  
19  
20  
21  
22  
23  
24  
25  
26  
27  
28  
29  
30  
31  
32  
33  
34  
35  
36  
37  
38  
39  
40  
41  
42  
43  
44  
45  
46  
47  
48  
49  
50  
51  
52  
53  
54  
55  
56  
57  
58  
59  
60
- This large representative sample was recruited from a state-wide jurisdiction and so likely represents the actual experience of patients from regional and remote Australia.
  - This study was cross-sectional therefore causality cannot be assumed.
  - This study was aimed at gaining an insight into the experiences of regional and remote cancer patients, hence findings are not generalisable to urbanised populations.

## INTRODUCTION

In Australia, as in other high income countries, cancer care delivery systems continue to be tested by increasing cancer prevalence due to an aging population and increasing survival. (1) Compounding this, widening socioeconomic and geographic inequities in cancer outcomes, (2) increasing healthcare costs, and workforce shortages (3,4) are all exacerbated by rapidly expanding, and complex, cancer diagnostic and treatment options. (5) In response, national societies and cancer control agencies globally have developed frameworks and guidelines for quality care cancer services that typically include characteristics such as being person-centered and tailored, evidence-based, coordinated, multi-disciplinary, quality assured and accountable. (6–9) While many of these guidelines focus on treatment, supportive and psychosocial care is also a central feature. For example, the first (of eight) recommendations from the Institute of Medicine 2013 report centers on patients and families receiving understandable information about all aspects of their cancer care. (8) The Australian Government's guides to best-practice cancer care, the Optimal Cancer Care Pathways, list access to supportive care, including survivorship, as a key theme across all steps of the care pathway. (7) Similarly, risk stratified pathways of cancer care in the UK emphasize assessing and supporting holistic patient needs, including those that are psychosocial and spiritual. While such frameworks are important, the question arises as to how cancer services might best evaluate the extent to which cancer care is meeting these recommendations, where gaps most exist, and crucially who is more vulnerable to underservicing.

A number of groups have developed indicators to reflect the extent to which optimal care is being delivered in terms of information, communication, education and care-coordination during diagnosis and treatment. (10,11) Thus far this been for quality assurance purposes within administering jurisdictions with findings not generally presented within the peer-reviewed literature. A set of items was recently developed by Cancer Australia for



1  
2 monitoring cancer patient experiences at the national level. The National Cancer Control  
3 Indicators (NCCI) patient experiences items are based on the National Health Service (NHS)  
4 England Cancer Patient Experience Survey, (12) and reflect the receipt and understanding of  
5 information about diagnosis and side effects of treatment as well as patient involvement in  
6 care and decision making, and the provision of care co-ordination tools and services. To date,  
7 results from the Australian NCCI indicators for patient experience have not been reported.  
8  
9  
10  
11  
12  
13  
14  
15

16 It is especially important to consider the quality of the patient experience for people  
17 who live in geographically remote locations. People with cancer living in remote locations  
18 incur the additional burden of having to travel long distances to attend specialist treatment  
19 facilities that are not available in sparsely populated and geographically remote areas of the  
20 country. (13) Cancer patients who live outside of major cities in Australia are known to  
21 experience poorer cancer outcomes (14,15) and report poor physical and mental health,  
22 (16,17) lower quality of life (QoL) (18,19) and unmet supportive care needs (18,20,21)  
23 compared to their urban counterparts.  
24  
25  
26  
27  
28  
29  
30  
31  
32  
33

34 Accordingly, the present study applied the NCCI guidelines as a framework to  
35 examine the health services experience of cancer patients and their families from regional and  
36 remote Australia experiencing geographic dislocation while obtaining cancer treatment. In  
37 doing so: 1) the construct validity of the NCCI guidelines was examined, 2) the extent to  
38 which these guidelines are currently being met was tested, 3) sociodemographic predictors of  
39 underservicing were explored, and 4) how psychosocial outcomes, unmet supportive care  
40 needs, satisfaction with health care were related to underservice were described.  
41  
42  
43  
44  
45  
46  
47  
48  
49  
50

## 51 **METHOD**

### 52 **Patient and Public Involvement Statement**

53 Patient and public involvement in the design and conduct of the study was sought from  
54 community members, research volunteers, and pilot study participants. Several community  
55 members including cancer survivors living in rural areas reviewed interview and  
56  
57  
58  
59  
60

1  
2  
3 questionnaire items providing feedback on the clarity, formatting, and time to complete. The  
4  
5 research volunteers tested and evaluated materials and protocols while patients provided  
6  
7 written and verbal feedback to researchers regarding clarity, burden and relevance associated  
8  
9 with completing study materials. Minor refinements to the study materials to were made to  
10  
11 increase clarity and ease of delivery based on this feedback.  
12  
13

## 14 **Participants**

15  
16 Participants (n = 518) were cancer patients from regional and remote Queensland  
17  
18 staying at six Cancer Council Queensland (CCQ; a cancer control not-for-profit) lodges  
19  
20 providing low or no - cost accommodation while receiving cancer care. [Figure 1](#) depicts  
21  
22 participant recruitment flow. Eligibility criteria were: 18 years or older, able to read and  
23  
24 understand English, and staying at a CCQ lodge for cancer treatment. A total of 1405 of  
25  
26 1801 eligible CCQ lodge guests staying between September 11<sup>th</sup>, 2017 and 1<sup>st</sup> February, 2020  
27  
28 were provided with an invitation pack containing study details, consent forms and a  
29  
30 questionnaire. Three hundred and ninety-six eligible guests were not approached as contact  
31  
32 details were not provided or accurate.  
33  
34  
35

36  
37 Invitation packs were distributed upon arrival by lodge staff or, if this was not  
38  
39 possible (e.g., after hours check-in) were sent via mail to their home address. Patients were  
40  
41 contacted by phone one week after pack distribution, offered further details and invited to  
42  
43 participate. Assessments included a self-administered questionnaire and face-to-face (or  
44  
45 telephone) interview at baseline, followed by self-administered questionnaires at 3 months,  
46  
47 12 months and annually thereafter.  
48  
49

50  
51 Of the eligible patients who received an invitation pack (n=1405), 635 (45.2%)  
52  
53 consented to participate, 395 (28.1%) actively refused, and 375 (26.7%) did not return a  
54  
55 consent form and could not be re-contact-ed. This report focusses on data collected at  
56  
57 baseline for a sample of 518 consenting participants who completed both the questionnaire  
58  
59 and interview component of the study.  
60

## Materials and measures

Questionnaires assessed demographic and patient characteristics, patient experiences according to the NCCI, psychological distress and cognitive adjustment, satisfaction with healthcare, QoL, and supportive care needs. Structured interviews assessed diagnostic and treatment pathways. The study has approval from a recognized institutional Human Research Ethics Committee (ref. H17REA152).

### Demographics and patient characteristics

Site of current cancer, gender, age, country of birth, highest level of education, and household income were reported by each participant. Participant's residential street address at baseline was geocoded and mapped to the 2011 SA2 boundaries using MapMarker® Australia Version 15.16.0.21 and MapInfo Pro® Version 15.0 and classified by Remoteness Area (22) and Socio-Economic Indexes for Areas (SEIFA). (23) Most recently diagnosed primary cancer site was obtained via self-report and verified against the population-based Queensland Cancer Register (QCR). Self-report data were relied upon where diagnosis could not be verified by the QCR (n=39), for example if the patient had non-melanoma skin cancer (which is not routinely notified to registries in Australia) or the patient's diagnosis had not yet been notified to the QCR.

### National Cancer Control Indicators - patient experience

Eight items derived from the National Health Service (NHS) England Cancer Patient Experience Survey (10) were adapted by Cancer Australia (12) as measures of National Cancer Control Indicators (NCCI) of cancer patient experiences. The items captured four key elements including 1) Patient information, communication and education during diagnosis; 2) Patient information, communication and education during; 3) Patient co-ordination and integration of care, continuity and transition; 4) Respect for patient preference. Response scales for each item vary including 3 category (e.g., yes, no, I don't know/remember) and 4 category (e.g., yes, yes to some extent, no, I don't know/remember) response options.

1  
2 Responses to each NCCI item were collapsed into a yes/no binary response with those  
3  
4 responding with “I don’t know” or “I don’t remember” coded as missing. Full item wording,  
5  
6 response categories and method for collapsing responses is available in as supplementary  
7  
8 material (Supplementary Table 1).  
9  
10

11 As the NCCI items have not been validated for use in research an exploratory factor  
12 analysis was conducted for the current sample. One to four-factor solutions were extracted  
13 sequentially using Mplus v.8 software. (24). The decision on the number of factors to retain  
14 was driven by 1) overall and comparative model fit (determined by  $\chi^2$  and  $\Delta\chi^2$  and their  
15 corresponding p values), 2) balancing the trade-off between explanatory power and  
16 parsimony (determined by the Bayesian and the Akaike information criteria), and 3) an  
17 interpretable pattern of strong and non-cross-loading factor loadings.  
18  
19  
20  
21  
22  
23  
24  
25  
26  
27

28 For the one to three-factor solutions, overall model fit improved as a function of the  
29 number of factors extracted (see [Table 1](#)). However, the four-factor solution yielded a poorer  
30 fit than the three-factor solution according to both  $\chi^2$  and information criteria values and was  
31 not considered a candidate solution. The Bayesian information criterion shows that the three-  
32 factor solution exhibited poorer fit compared to the two-factor solution once model  
33 complexity was accounted for. Therefore, the two-factor solution represented the best trade-  
34 off of explanatory power and parsimony. Finally, the two-factor solution also yielded a  
35 simple structure in the pattern of item loadings. Each NCCI item loaded cleanly onto one of  
36 each of the two factors (see [Table 2](#)); the first reflecting effective communication and patient  
37 involvement the second reflecting the provision of information or services. A confirmatory  
38 factor analytic approach was used to calculate factor score variables for the communication  
39 and patient involvement and provision of information and services. Factor score variables  
40 were transformed so that scores ranged from 0 (low) to 1.68 (high) for the communication  
41 and patient involvement factor and 0 (low) to 1.84 (high) for the provision of information and  
42 services factor.  
43  
44  
45  
46  
47  
48  
49  
50  
51  
52  
53  
54  
55  
56  
57  
58  
59  
60

Table 1. Comparative fit statistics for one to four factor EFA solutions

|                                             | 1-factor        | 2-factor       | 3-factor       | 4-factor                      |
|---------------------------------------------|-----------------|----------------|----------------|-------------------------------|
| <b>AIC</b>                                  | 3848.70         | 3784.24        | 3775.34        | 3787.09                       |
| <b><math>\Delta</math>AIC</b>               | -               | 64.46          | 8.89           | -11.74                        |
| <b>BIC</b>                                  | 3916.70         | 3881.99        | 3898.59        | 3931.59                       |
| <b><math>\Delta</math>BIC</b>               | -               | 34.71          | -16.61         | -32.99                        |
| <b><math>\chi^2</math> (<i>p</i>)</b>       | 435.96 (< .001) | 306.55 (.001)  | 207.71 (.776)  | 225.45 (.368)                 |
| <b><math>\Delta\chi^2</math> (<i>p</i>)</b> | -               | 84.76 (< .001) | 40.37 (< .001) | ( $\Delta\chi^2$ is negative) |

For peer review only

Table 2. Exploratory factor analysis item loadings for two-factor solution

| Item                                                                                                                                                | Communication<br>and patient<br>involvement | Provision of<br>information and<br>services |
|-----------------------------------------------------------------------------------------------------------------------------------------------------|---------------------------------------------|---------------------------------------------|
| Do you think your views were taken into account when the team of doctors and nurses caring for you were discussing which treatment you should have? | <b>0.884*</b>                               | 0.005                                       |
| Were you involved as much as you wanted to be in decisions about your care and treatment?                                                           | <b>0.925*</b>                               | -0.063                                      |
| Were the possible side effects of treatment(s) explained in a way you could understand?                                                             | <b>0.507*</b>                               | 0.249*                                      |
| When you were told you had cancer, did you understand the explanation of what was wrong with you?                                                   | <b>0.633*</b>                               | 0.059                                       |
| Have you been offered a written assessment and care plan?                                                                                           | 0.185                                       | <b>0.579*</b>                               |
| When you were told you had cancer, were you given written information about the type of cancer you had?                                             | 0.075                                       | <b>0.579*</b>                               |
| Before you started your treatment, were you given written information about the side effects of treatment(s)?                                       | 0.002                                       | <b>0.719*</b>                               |
| Were you given the name of a Clinical Nurse Specialist who would support you through your treatment?                                                | -0.001                                      | <b>0.736*</b>                               |

Geomin Rotated Loadings (\* significant at 5% level)

## Running head: REGIONAL AND REMOTE CANCER PATIENTS EXPERIENCES

## Psychological distress and adjustment

Stress, anxiety and depression were measured using the 21-item Depression, Anxiety, and Stress Scale (DASS-21) (25). The scale asks respondents to indicate the degree to which each statement applied to them over the past week on a four-point Likert scale ranging from 0 = *not at all* to 3 = *almost always*. Scores for each subscale were summed and multiplied by 2, with higher scores indicating more distress. (26) Reliability for the anxiety ( $\alpha = .67$ ), stress ( $\alpha = .87$ ) and depression ( $\alpha = .90$ ) subscales were adequate to excellent.

Psychological adjustment to a cancer diagnosis was assessed using the Constructed Meaning Scale (CMS). The 8 item CMS measures a patients' cognitive response to being diagnosed with a life-threatening illness (27) on a 4-point Likert scale ranging from 1 = *strongly disagree* to 4 = *strongly agree*. Scores on the CMS reflect ability to construct a positive outlook regarding the effect that cancer has or will have on their future, their relationships, and their sense of self. Internal consistency in the current study was good ( $\alpha = .77$ ).

## Satisfaction with healthcare

Nine items were created by the researchers to assess patients' satisfaction with their health care in terms of the referral process, speed of diagnosis, speed of test results, the hospital where they were treated and the doctors and nurses, the emotional and physical support they receive in hospital and finally, and their medical care overall. Degree of satisfaction with each item was reported on a 5-point Likert scale ranging from 1 = *very dissatisfied* to 5 = *very satisfied*. Data and participant feedback from the pilot phase were examined to ensure items were clear and relevant and excellent internal consistency for the measure was evident ( $\alpha = .92$ ). Items were averaged to create a mean score.

## Quality of life

## Regional and remote cancer patients' experiences

13

Multidimensional QoL was measured using the 35-item Assessment of Quality of Life 8 Dimension instrument (AQoL-8D)(28). Participants responded on a 5-point Likert scale based on aspects of QoL during the past week. Responses are coded so that lower scores reflect poorer QoL on two psychometrically derived dimensions reflecting physical and psychological wellbeing. Internal reliability was evident for physical ( $\alpha = .64$ ) and psychological ( $\alpha = .92$ ) dimensions in the current study.

## Supportive care needs

Unmet need was measured using the Supportive Care Needs Survey Short Form-34 (SCNS-SF34). (29) The scale assesses patient need for support across five domains including physical and daily living, psychological, health systems and information, patient care and support, and sexuality with a single item regarding financial needs. Responses were coded: 0 (*no need/not applicable/need satisfied*), 1 (*low need*), 2 (*moderate need*), or 3 (*high need*) and means calculated resulting in six continuous variables reflecting the degree of need in each domain. Subscales showed excellent internal reliability (physical and daily living needs  $\alpha = .86$ ; psychological needs  $\alpha = .94$ ; health system and information needs  $\alpha = .95$ ; patient care and support needs  $\alpha = .88$ ; sexuality needs  $\alpha = .87$ ).

**Analysis**

Data analyses were carried out in SPSS Version 26. (30) Frequencies and percentages were calculated for patient responses to each NCCI item. Demographics and area-level characteristic differences in the likelihood of reporting *yes* to a NCCI item were examined using chi-square statistics. A family-wise error rate adjustment was applied to constrain the chance of Type 1 errors to 5%. One-way analyses of variance (ANOVA) were used to identify group differences in NCCI factor scores. Pearson's point biserial correlations assessed whether age was associated with NCCI items and factors. Where group differences were significant, post-hoc contrasts were applied to compare each category against others.

13



## Regional and remote cancer patients' experiences

14

Odds ratios (OR) and 95% confidence intervals (CI) were reported for contrasts involving NCCI items. Associations between factor scores and health/psychosocial variables were assessed using a series of correlations with coefficients graphed and compared using a Fisher's z-test. Missing data were excluded from analyses in a pairwise manner.

**RESULTS****Sample characteristics**

Participant ages ranged from 26 to 93 ( $M = 64.6$ ,  $SD = 11.18$ ) and 47.3% of participants identified as female and 52.7% as male. Most participants were born in Australia (80.5%), with the remainder born in the UK (9.9%), New Zealand (4.7%), and other countries (4.9%). Most participants reported low income with 64.8% reporting a household income under \$50,000 a year (i.e., the median yearly gross income in Australia). Most patients were not fully covered by private health insurance (81.5%) and the majority lived in inner (44.0%) or outer (42.5%) regional areas marked by high levels of socio-economic disadvantage (i.e., 66.5% were in the lowest socio-economic quintiles). The most common primary cancers were breast (19.3%), head and neck (14.3%), and skin (12.6%). – see [Table 3](#). Referenced to population statistics (31), the current sample was representative of the non-metropolitan Queensland cancer population in terms of gender, age, and country of birth. However, patients with skin cancer were under-represented (24.5% in population) and patients with head and neck cancer were over-represented (5.8% in population). At the time of data collection, time since diagnosis for each participant ranged between and 33.7 years and 1 day (Median = 211), with 64% of participants diagnosed within the previous 12 mont

Running head: REGIONAL AND REMOTE CANCER PATIENTS EXPERIENCES

Table 3. Participant characteristics and responses to NCCI items with chi-square and ANOVA group comparisons.

|                           |                          | Communication and patient involvement |                             |                              |                              |                     | Provision of information and services |                                |                              |                                    |                     |
|---------------------------|--------------------------|---------------------------------------|-----------------------------|------------------------------|------------------------------|---------------------|---------------------------------------|--------------------------------|------------------------------|------------------------------------|---------------------|
|                           | Total n (%) <sup>^</sup> | Views on treatment n (%)              | Involved in decisions n (%) | Side effects explained n (%) | Understand Explanation n (%) | Factor Score M (SD) | Written info on type of cancer n (%)  | Assessment and care plan n (%) | Clinical nurse support n (%) | Written info on side effects n (%) | Factor Score M (SD) |
| <b>Gender</b>             |                          | $\chi^2 = 2.69$                       | $\chi^2 = 1.30$             | $\chi^2 = 0.32$              | $\chi^2 = 0.10$              | $F = 2.15$          | $\chi^2 = 7.88^*$                     | $\chi^2 = 0.23$                | $\chi^2 = 1.05$              | $\chi^2 = 1.46$                    | $F = 2.92$          |
| Female                    | <b>245 (52.7%)</b>       | 147 (63.4%)                           | 149 (63.4%)                 | 156 (65.5%)                  | 234 (97.5%)                  | 1.17 (0.43)         | 163 (70.3%)                           | 73 (36.3%)                     | 157 (71.7%)                  | 199 (86.9%)                        | 1.36 (0.46)         |
| Male                      | <b>273 (47.3%)</b>       | 147 (56.1%)                           | 165 (58.4%)                 | 182 (67.9%)                  | 263 (97.0%)                  | 1.11 (0.43)         | 152 (58.2%)                           | 86 (38.6%)                     | 160 (66.4%)                  | 209 (82.9%)                        | 1.21 (0.48)         |
| <b>Education</b>          |                          | $\chi^2 = 16.61^*$                    | $\chi^2 = 144 (68.2\%)$     | $\chi^2 = 9.70^*$            | $\chi^2 = 0.84$              | $F = 9.24$          | $\chi^2 = 3.00$                       | $\chi^2 = 11.44^*$             | $\chi^2 = 6.39$              | $\chi^2 = 2.65$                    | $F = 7.46^*$        |
| Middle school (yr 10)     | <b>217 (42.3%)</b>       | 146 (70.2%)                           | 41 (55.4%)                  | 155 (73.1%)                  | 205 (96.7%)                  | 1.23 (0.42)         | 141 (68.1%)                           | 85 (47.0%)                     | 141 (75.8%)                  | 176 (86.7%)                        | 1.27 (0.48)         |
| Senior school (yr 12)     | <b>78 (15.1%)</b>        | 39 (53.4%)                            | 117 (55.2%)                 | 41 (53.9%)                   | 76 (98.7%)                   | 1.05 (0.42)         | 44 (57.9%)                            | 17 (28.3%)                     | 47 (64.4%)                   | 55 (78.6%)                         | 1.07 (0.47)         |
| Trade/Tertiary            | <b>218 (42.5%)</b>       | 107 (51.4%)                           | $\chi^2 = 0.06$             | 139 (65.3%)                  | 211 (97.2%)                  | 1.08 (0.42)         | 128 (62.4%)                           | 57 (31.8%)                     | 127 (64.8%)                  | 172 (84.7%)                        | 1.12 (0.46)         |
| <b>&gt; median income</b> |                          | $\chi^2 = 0.03$                       | 182 (59.7%)                 | $\chi^2 = 0.06$              | $\chi^2 = 2.17$              | $F = 0.09$          | $\chi^2 = 0.24$                       | $\chi^2 = 0.44$                | $\chi^2 = 1.46$              | $\chi^2 = 1.66$                    | $F = 0.01$          |
| Yes                       | <b>318 (65.3%)</b>       | 73 (57.5%)                            | 144 (68.2%)                 | 84 (67.2%)                   | 126 (99.2%)                  | 1.14 (0.40)         | 81 (65.3%)                            | 37 (34.9%)                     | 77 (66.4%)                   | 103 (88.8%)                        | 1.17 (0.47)         |
| No                        | <b>169 (34.7%)</b>       | 172 (58.3%)                           | 78 (60.9%)                  | 204 (66.0%)                  | 301 (96.8%)                  | 1.13 (0.44)         | 189 (62.8%)                           | 100 (38.6%)                    | 200 (72.5%)                  | 248 (83.8%)                        | 1.17 (0.48)         |
| <b>Born in Australia</b>  |                          | $\chi^2 = 0.01$                       | $\chi^2 = 0.15$             | $\chi^2 = 0.59$              | $\chi^2 = 1.62$              | $F = 0.18$          | $\chi^2 = 0.55$                       | $\chi^2 = 0.15$                | $\chi^2 = 0.43$              | $\chi^2 = 0.85$                    | $F = 0.02$          |
| Yes                       | <b>413 (80.5%)</b>       | 233 (59.6%)                           | 238 (60.3%)                 | 261 (65.6%)                  | 387 (96.8%)                  | 1.32 (0.44)         | 246 (63.2%)                           | 127 (38.0%)                    | 248 (69.5%)                  | 322 (85.4%)                        | 1.17 (0.48)         |
| No                        | <b>100 (19.5%)</b>       | 58 (59.8%)                            | 63 (62.4%)                  | 71 (69.6%)                   | 104 (99.0%)                  | 1.15 (0.42)         | 66 (67.3%)                            | 30 (35.7%)                     | 64 (66.0%)                   | 80 (81.6%)                         | 1.16 (0.45)         |
| <b>Full PHI cover</b>     |                          | $\chi^2 = 0.86$                       | $\chi^2 = 0.44$             | $\chi^2 = 0.10$              | $\chi^2 = 0.96$              | $F = 0.26$          | $\chi^2 = 0.32$                       | $\chi^2 = 0.05$                | $\chi^2 = 3.38$              | $\chi^2 = 0.85$                    | $F = 0.01$          |
| Yes                       | <b>91 (18.5%)</b>        | 55 (64.7%)                            | 56 (64.4%)                  | 57 (65.5%)                   | 85 (98.8%)                   | 1.16 (0.24)         | 55 (67.1%)                            | 27 (36.0%)                     | 48 (60.0%)                   | 73 (88.0%)                         | 1.17 (0.47)         |
| No                        | <b>400 (81.5%)</b>       | 224 (59.3%)                           | 233 (60.5%)                 | 261 (67.3%)                  | 380 (96.9%)                  | 1.37 (0.44)         | 242 (63.7%)                           | 120 (37.4%)                    | 247 (70.6%)                  | 308 (83.9%)                        | 1.17 (0.48)         |
| <b>Cancer Site</b>        |                          | $\chi^2 = 4.97$                       | $\chi^2 = 8.65$             | $\chi^2 = 2.59$              | $\chi^2 = 1.37$              | $F = 2.29^*$        | $\chi^2 = 29.65^*$                    | $\chi^2 = 2.81$                | $\chi^2 = 46.11^*$           | $\chi^2 = 17.43^*$                 | $F = 8.03^*$        |
| Breast                    | <b>100 (19.3%)</b>       | 65 (68.4%)                            | 66 (68.0%)                  | 60 (61.9%)                   | 97 (98.0%)                   | 1.23 (0.43)         | 78 (80.4%)                            | 33 (41.3%)                     | 87 (92.6%)                   | 84 (92.3%)                         | 1.36 (0.39)         |
| Skin                      | <b>65 (12.6%)</b>        | 38 (59.4%)                            | 32 (50.8%)                  | 39 (61.9%)                   | 62 (95.4%)                   | 1.05 (0.46)         | 29 (44.6%)                            | 19 (34.5%)                     | 27 (48.2%)                   | 43 (69.4%)                         | 0.97 (0.54)         |
| Head & Neck               | <b>74 (14.3%)</b>        | 39 (54.2%)                            | 48 (66.7%)                  | 51 (68.9%)                   | 71 (97.3%)                   | 1.14 (0.42)         | 37 (52.9%)                            | 26 (44.8%)                     | 39 (66.1%)                   | 60 (85.7%)                         | 1.16 (0.48)         |
| Prostate                  | <b>64 (12.3%)</b>        | 38 (62.3%)                            | 43 (67.2%)                  | 43 (68.3%)                   | 62 (98.4%)                   | 1.20 (0.41)         | 47 (75.8%)                            | 20 (37.7%)                     | 47 (81.0%)                   | 49 (80.3%)                         | 1.25 (0.45)         |
| Other                     | <b>215 (41.5%)</b>       | 114 (56.4%)                           | 116 (56.3%)                 | 145 (69.4%)                  | 205 (97.2%)                  | 1.10 (0.24)         | 124 (62.3%)                           | 61 (34.3%)                     | 117 (60.6%)                  | 172 (87.3%)                        | 1.12 (0.46)         |
| <b>TOTAL</b>              | <b>518 (100%)</b>        | 294 (59.5%)                           | 305 (60.8%)                 | 338 (66.8%)                  | 498 (97.3%)                  | 1.14 (0.43)         | 316 (64.0%)                           | 159 (37.5%)                    | 317 (68.9%)                  | 408 (84.8%)                        | 1.17 (0.47)         |

PHI - Private Health Insurance. n (%) = number and percentage of participants in each demographic category responding yes to item, M (SD) = Mean and SD reported for factor scores, ^ valid percent calculated based on non-missing responses to this item, \* =  $p < .05$  (applying family-wise error rate adjustment for multiple  $\chi^2$  tests)

Regional and remote cancer patients' experiences

Table 3 cont. Participant characteristic and responses to NCCI items with chi-square and ANOVA group comparisons.

|                           | Communication and patient involvement |                                |                                   |                                    |                                    | Provision of information and services |                                            |                                      |                                    |                                          |                        |
|---------------------------|---------------------------------------|--------------------------------|-----------------------------------|------------------------------------|------------------------------------|---------------------------------------|--------------------------------------------|--------------------------------------|------------------------------------|------------------------------------------|------------------------|
|                           | Total<br>n (%)                        | Views on<br>treatment<br>n (%) | Involved in<br>decisions<br>n (%) | Side effects<br>explained<br>n (%) | Understand<br>explanation<br>n (%) | Factor Score<br>M (SD)                | Written info on<br>type of cancer<br>n (%) | Assessment<br>and care plan<br>n (%) | Clinical nurse<br>support<br>n (%) | Written info<br>on side effects<br>n (%) | Factor Score<br>M (SD) |
| <b>SEIFA Quintile</b>     |                                       | $\chi^2 = 5.29$                | $\chi^2 = 3.45$                   | $\chi^2 = 4.04$                    | $\chi^2 = 4.59$                    | $F = 0.61$                            | $\chi^2 = 1.30$                            | $\chi^2 = 0.90$                      | $\chi^2 = 5.58$                    | $\chi^2 = 2.64$                          | $F = 0.41$             |
| 1 <sup>st</sup> (lowest)  | <b>185 (36.0%)</b>                    | 115 (64.2%)                    | 110 (60.8%)                       | 129 (71.3%)                        | 180 (98.4%)                        | 1.17 (0.43)                           | 113 (63.8%)                                | 56 (37.3%)                           | 118 (71.1%)                        | 154 (88.0%)                              | 1.20 (0.46)            |
| 2 <sup>nd</sup>           | <b>155 (30.3%)</b>                    | 89 (60.5%)                     | 93 (61.2%)                        | 99 (65.6%)                         | 147 (96.1%)                        | 1.12 (0.45)                           | 98 (65.8%)                                 | 49 (38.9%)                           | 90 (65.7%)                         | 122 (82.4%)                              | 1.16 (0.49)            |
| 3 <sup>rd</sup>           | <b>112 (21.9%)</b>                    | 59 (57.3%)                     | 59 (56.75)                        | 65 (60.2%)                         | 105 (95.5%)                        | 1.09 (0.44)                           | 66 (63.5%)                                 | 36 (40.9%)                           | 71 (72.4%)                         | 82 (83.7%)                               | 1.17 (0.49)            |
| 4 <sup>th</sup>           | <b>54 (10.6%)</b>                     | 25 (47.2%)                     | 37 (69.8%)                        | 37 (68.5%)                         | 54 (100.0%)                        | 1.12 (0.39)                           | 32 (59.3%)                                 | 17 (34.7%)                           | 31 (64.6%)                         | 42 (82.4%)                               | 1.13 (0.48)            |
| 5 <sup>th</sup> (highest) | <b>5 (1.0%)</b>                       | 3 (60.0%)                      | 2 (40.0%)                         | 3 (60.0%)                          | 5 (100.0%)                         | 1.04 (0.43)                           | 4 (80.0%)                                  | 1 (25.0%)                            | 1 (25.0%)                          | 3 (75.0%)                                | 1.02 (0.041)           |
| <b>ARIA</b>               |                                       | $\chi^2 = 5.22$                | $\chi^2 = 3.35$                   | $\chi^2 = 4.55$                    | $\chi^2 = 2.66$                    | $F = 0.48$                            | $\chi^2 = 0.99$                            | $\chi^2 = 4.67$                      | $\chi^2 = 2.47$                    | $\chi^2 = 0.94$                          | $F = 0.99$             |
| Major city                | <b>24 (4.7%)</b>                      | 9 (37.5%)                      | 14 (58.3%)                        | 13 (54.2%)                         | 24 (100.0%)                        | 1.03 (0.44)                           | 17 (70.8%)                                 | 10 (41.7%)                           | 14 (63.6%)                         | 20 (90.9%)                               | 1.17 (0.46)            |
| Inner regional            | <b>225 (44.0%)</b>                    | 128 (60.7%)                    | 140 (63.6%)                       | 154 (70.3%)                        | 216 (97.3%)                        | 1.15 (0.38)                           | 139 (64.7%)                                | 61 (33.5%)                           | 133 (68.6%)                        | 177 (83.5%)                              | 1.16 (0.44)            |
| Outer regional            | <b>217 (42.5%)</b>                    | 128 (61.0%)                    | 125 (60.4%)                       | 140 (65.7%)                        | 207 (96.3%)                        | 1.12 (0.47)                           | 129 (62.3%)                                | 76 (43.4%)                           | 134 (68.0%)                        | 172 (85.1%)                              | 1.19 (0.52)            |
| Remote                    | <b>23 (4.5%)</b>                      | 13 (61.9%)                     | 12 (54.5%)                        | 14 (66.7%)                         | 23 (100.0%)                        | 1.14 (0.44)                           | 13 (61.9%)                                 | 7 (38.9%)                            | 14 (66.7%)                         | 16 (84.2%)                               | 1.17 (0.50)            |
| Very remote               | <b>22 (4.3%)</b>                      | 13 (61.9%)                     | 10 (45.5%)                        | 12 (54.5%)                         | 21 (100.0%)                        | 1.08 (0.43)                           | 15 (68.2%)                                 | 5 (27.8%)                            | 16 (84.2%)                         | 18 (85.7%)                               | 1.18 (0.48)            |

n(%) = number and percentage of participants in each area-level category responding yes to item, M (SD) = Mean and SD reported for factor scores, \* = p < .05 (applying family-wise error rate adjustment)

Running head: REGIONAL AND REMOTE CANCER PATIENTS EXPERIENCES

### Communication and patient involvement

Participants reported that their views were taken into account when their team of doctors and nurses were discussing their treatment 59.5% of the time (Table 3). Those with middle school education or lower were twice as likely to report having their views taken into account in treatment decisions (OR = 2.22, CI = 1.49 – 3.33) compared to those with senior high school or trade/tertiary level education. Older patients were slightly more likely to report that their views were taken into account by doctors and nurses when deciding on treatment ( $r = .11, p = .02$ ). Similarly, 60.8% of participants felt they were involved in decisions about their care and treatment as much as they would have liked, however, this did not vary according to individual characteristics.

Most participants reported understanding the explanation of “what was wrong with them” upon diagnosis (97.3%) and this did not differ significantly according to individual characteristics. Most patients (66.8%) reported that the possible side-effects of their treatment were explained to them in a way they could understand. Those with middle school education or lower were 1.5 times more likely to report having side effects explained to them in a way that they understood compared to those with trade/tertiary level education (OR = 1.50, CI = 1.14 – 1.96) and those with senior level education were less likely to report this compared to those with trade/tertiary level education (OR = 0.65, CI = 0.46 – 0.90).

Group differences were evident in participants’ scores on the communication and patient involvement factor with patients possessing middle school level education (M = 1.23, SD = 0.42) reporting higher scores than those with trade/tertiary level education (M = 1.08, SD = 0.42),  $t(509) = 42.75, p < .001, d = 0.36$ , or those with senior school level education (M = 1.05, SD = 0.42),  $t(509) = 21.88, p < .001, d = 0.43$ . When compared with all other cancer types, patients with breast (M = 1.23, SD = 0.43),  $t(512) = 28.75, p < .001, d = 0.28$ , and prostate (M = 1.20, SD = 0.41),  $t(512) = 22.40, p < .001, d = 0.17$  cancer reported higher

## Regional and remote cancer patients' experiences

18

1  
2  
3 scores on the communication and patient involvement factor, while those with skin (M =  
4 1.05, SD = 0.46),  $t(512) = 19.75, p < .001, d = 0.22$  and head and neck (M = 1.14, SD =  
5 0.42),  $t(512) = 22.83, p < .001, d = 0.01$  cancers reported lower scores than those with other  
6  
7  
8  
9  
10 cancer types.

**Provision of information and services**

11  
12  
13  
14  
15 Sixty-four percent of participants were given written information about the type of  
16  
17 cancer they had. Females were 1.69 (CI = 1.16 – 2.46) times as likely to report receiving this  
18  
19 information when compared to males. Patients with breast cancer were 2.41 (CI = 1.39 –  
20  
21 4.42) times more likely, and those with skin cancer were 0.49 (CI = 0.28 – 1.18) times as  
22  
23 likely to receive written information about the type of cancer they had compared to those  
24  
25 with other cancers. The majority of patients reported being given written information about  
26  
27 the side effects of treatment (84.8%) with those with skin cancer less likely to receive this  
28  
29 information compared to those with other cancer types 0.33 (CI= 0.17 – 0.65).  
30  
31  
32

33  
34 Only 37.5% of participants reported receiving a written assessment and care plan.  
35  
36 Those with middle school education or lower were almost two times more likely to report  
37  
38 receiving an assessment and care plan (OR = 1.90, CI = 1.23 – 2.91) compared to those with  
39  
40 senior high school or trade/tertiary level education. Over two thirds of patients reported being  
41  
42 given the name of a clinical nurse specialist to support them through treatment (68.9%),  
43  
44 however, patients with breast cancer were 8.07 (CI = 3.55 – 18.37) times more likely, and  
45  
46 patients with prostate cancer patients were 2.77 (CI = 1.36– 5.68) times more likely, to be  
47  
48 offered this service compared to participants with other types of cancer.  
49  
50

51  
52 Those with middle school level education or lower (M = 1.27, SD = 0.48) reported  
53  
54 higher scores on the provision of service and information factor than those with trade/tertiary  
55  
56 level education (M = 1.12, SD = 0.47),  $t(509) = 39.71, p < .001, d = 0.32$  or those with senior  
57  
58 school level education (M = 1.07, SD = 0.46),  $t(509) = 20.28, p < .001, d = 0.42$ . When  
59  
60 compared with all other cancer types, patients with breast (M = 1.36, SD = 0.39),  $t(99) =$   
18

34.47,  $p < .001$ ,  $d = 0.54$  or prostate ( $M = 1.25$ ,  $SD = 0.45$ ),  $t(63) = 22.42$ ,  $p < .001$ ,  $d = 0.19$  cancer reported higher scores on the provision of information and services factor, while those with skin ( $M = 0.97$ ,  $SD = 0.54$ ),  $t(64) = 14.52$ ,  $p < .001$ ,  $d = 0.46$  or head and neck ( $M = 1.16$ ,  $SD = 0.48$ ),  $t(73) = 20.73$ ,  $p < .001$ ,  $d = 0.03$  cancers reported lower scores than those with other cancer types. Area-level characteristics (i.e., remoteness or SEIFA) were not significantly associated with single items or factor scores reflecting provision of information and services (see [Table 3](#)).

### Associations between NCCI factor scores and health and psychosocial variables

Both communication and patient involvement and provision of information and services factors shared significant positive associations with QoL, satisfaction with health care and constructed meaning (see [Figure 2](#)). They were also both associated with lower supportive care needs in most cases, the strongest associations being with health system and information needs. The communication and patient involvement factor was moderately associated with greater psychosocial QoL ( $r = .30$ ,  $p < .001$ ) and satisfaction with healthcare ( $r = .29$ ,  $p < .001$ ) as well as lower levels of unmet 'health systems and information' ( $r = -.39$ ,  $p < .001$ ). and 'patient care' ( $r = .35$ ,  $p < .001$ ) needs and lower cancer threat appraisal ( $r = .31$ ,  $p < .001$ ). The provision of information and services factor had a weaker pattern of associations though still moderately predicted lower levels of unmet 'health systems and information' ( $r = -.32$ ,  $p < .001$ ) and 'patient care' ( $r = -.23$ ,  $p < .001$ ) needs as well as greater satisfaction with healthcare ( $r = .23$ ,  $p < .001$ ). The communication and patient involvement factor shared significantly stronger associations with higher psychosocial QoL ( $z = 2.03$ ,  $p = .042$ ), and lower levels of unmet need in terms of psychosocial support ( $z = 2.05$ ,  $p = .040$ ) and patient care ( $z = 2.00$ ,  $p = .046$ ). Communication and patient involvement was associated with lower stress and anxiety, while provision of information and services was not (see [Figure 2](#)).

1  
2  
3 Area-level characteristics (i.e., remoteness or SEIFA) were not significantly  
4 associated with single items or scores on either NCCI factor (see [Table 3](#)).  
5  
6

## 7 **DISCUSSION**

8  
9  
10 The goal of delivering equitable patient-centered cancer care is a corner stone of  
11 cancer control plans and care guidelines. (6,7,9,12) The present study suggests that the NCCI  
12 patient experience indicators have validity and strong potential as a quality assurance tool to  
13 support this. Importantly, this brief tool discriminated between different aspects of patient  
14 experience for those dislocated from their home during treatment and identified  
15 characteristics associated with a poorer experience. While it was almost universal for patients  
16 to recall understanding the explanation of their treatment, and most people reported that  
17 treatment side effects were explained and supported with written information, only a minority  
18 received a written assessment and care plan. Further, patient experience varied by clinical  
19 and sociodemographic characteristics suggesting that there is work to be done on better  
20 understanding what influences care, and how we might intervene.  
21  
22  
23  
24  
25  
26  
27  
28  
29  
30  
31  
32  
33  
34

35 From a construct perspective, the patient experience as measured by the NCCI  
36 indicators presented along two key dimensions: 1) communication and patient involvement  
37 and 2) provision of information and services. For both dimensions, the strong association  
38 with health system and information needs provides evidence of convergent validity. The  
39 closer connection between communication and patient involvement and QoL and  
40 psychosocial outcomes intuitively makes sense given the important role of the interpersonal  
41 relationships between the health care teams and patients, as well as the self-efficacy and  
42 personal agency that evolves from patient's involvement in their health care. (32) These  
43 associations may be bi-directional. Patients with lower psychological distress have a higher  
44 capacity to absorb information, take part in decision making, benefit from communications  
45 with healthcare professionals (33,34) and are subsequently more likely to report satisfaction  
46  
47  
48  
49  
50  
51  
52  
53  
54  
55  
56  
57  
58  
59  
60



with this element of their care. (35) Those individuals who are psychologically vulnerable or have poorer QoL likely need stepped up care to achieve optimal outcomes. (36)

Notably, breast and prostate cancer patients were more likely to receive clinical nurse support compared to skin and head and neck cancer patients. This may reflect the early introduction of the specialist nurse role for breast cancer patients, (37) and more recently prostate cancer patients. (38) While a specialist nurse appears to greatly enhance patient experience, (39) providing this for all cancer types is likely a resourcing challenge especially for regional and remote health services. Models that incorporate telehealth and that span broadly across multiple cancer types or chronic disease may be needed. (40) Higher education appeared to be associated with less communication and patient involvement and information and services. The reasons for this are unclear however it may be that health professionals assume these patients require less support or alternatively that people with more education have greater expectations in this domain of care.

As the aim of the present study was to provide specific insight into the experiences of regional and remote cancer patients, caution should be in applied in generalising these findings to urbanised populations. Since the survey is cross-sectional we cannot assume causality; and the data is self-reported and was not able to be verified by observational data or care records. However, this large, representative sample was recruited from a statewide jurisdiction and so likely represents the actual experience of patients from regional and remote Australia.

The present results outline the patient experience for a rural and regional population who are at risk of fragmented or poorly coordinated care. Patients who report better communication with their health care team and more involvement have better QoL, less stress and anxiety, and lower threat. Fulfilling the NCCI indicators connects to lower unmet need in health services and information. Cancer care services that ensure these indicators are



## Regional and remote cancer patients' experiences

22

met are better placed to provide an optimal cancer experience and improved patient-reported outcomes.

The NCCI presents as a useful and valid tool for assessing the patient experience. The aspect of care that appears most crucial is communication and involvement with the health care team. Strategies to optimize this for regional and remote patients need to be a cancer control priority.

For peer review only

## References

1. Bray F, Ferlay J, Soerjomataram I, Siegel RL, Torre LA, Jemal A. Global cancer statistics 2018: GLOBOCAN estimates of incidence and mortality worldwide for 36 cancers in 185 countries. *CA Cancer J Clin*. 2018;68(6):394–424.
2. Dasgupta P, Baade PD, Aitken JF, Ralph N, Chambers SK, Dunn J. Geographical variations in prostate cancer outcomes: a systematic review of international evidence. *Front Oncol*. 2019;9:238.
3. Alfano CM, Jefford M, Maher J, Birken SA, Mayer DK. Building personalized cancer follow-up care pathways in the United States: lessons learned from implementation in England, Northern Ireland, and Australia. *Am Soc Clin Oncol Educ Book*. 2019;39:625–639.
4. Ellison EC, Pawlik TM, Way DP, Satiani B, Williams TE. The impact of the aging population and incidence of cancer on future projections of general surgical workforce needs. *Surgery*. 2018;163(3):553–559.
5. Jakka S, Rossbach M. An economic perspective on personalized medicine. *HUGO J* [Internet]. 2013 Dec [cited 2020 Apr 20];7(1). Available from: <https://www.ncbi.nlm.nih.gov/pmc/articles/PMC4685168/>
6. National Health Service, UK. Innovation to implementation: Stratified pathways of care for people living with or beyond cancer A 'how to guide' [Internet]. 2016. Available from: <https://www.england.nhs.uk/wp-content/uploads/2016/04/stratified-pathways-update.pdf>
7. Australian Government, Department of Health. Optimal Cancer Care Pathways (OCPs) [Internet]. 2018. Available from: <https://www1.health.gov.au/internet/main/publishing.nsf/Content/occp>
8. Ganz PA, Balogh E. Delivering High-Quality Cancer Care: Charting a new course for a system in crisis. *Wash DC Inst Med Natl Acad*. 2013;
9. Bao H, Yang F, Su S, Wang X, Zhang M, Xiao Y, et al. Evaluating the effect of clinical care pathways on quality of cancer care: analysis of breast, colon and rectal cancer pathways. *J Cancer Res Clin Oncol*. 2016 May 1;142(5):1079–89.
10. Department of Health. National Cancer Patient Experience Survey 2018. National Results Summary [Internet]. National Health Service, United Kingdom; 2018. Available from: [https://assets.publishing.service.gov.uk/government/uploads/system/uploads/attachment\\_data/file/216682/dh\\_122520.pdf](https://assets.publishing.service.gov.uk/government/uploads/system/uploads/attachment_data/file/216682/dh_122520.pdf)
11. State of Victoria, Department of Health and Human Services. Understanding care experiences of people with cancer. Findings from pilot study 2 [Internet]. Victorian Government; 2016.
12. Cancer Australia, Australian Government. National Cancer Control Indicators. [Internet]. 2019. Available from: <https://ncci.canceraustralia.gov.au/>

13. Wilkes LM, White K, Mohan S, Beale B. Accessing metropolitan cancer care services: practical needs of rural families. *J Psychosoc Oncol*. 2006;24(2):85–101.
14. Ireland MJ, March S, Crawford-Williams F, Cassimatis M, Aitken JF, Hyde MK, et al. A systematic review of geographical differences in management and outcomes for colorectal cancer in Australia. *BMC Cancer*. 2017;17(1):95.
15. Cancer Council Queensland, Queensland University of Technology, Cooperative Research Centre for Spatial Information. Australian Cancer Atlas Version 09-2018. Accessed [give date] [Internet]. 2018 [cited 2018 Dec 14]. Available from: <https://atlas.cancer.org.au>
16. Weaver KE, Geiger AM, Lu L, Case LD. Rural-urban disparities in health status among US cancer survivors. *Cancer*. 2013;119(5):1050–1057.
17. Salehi A, Frommolt V, Coyne E. Factors affecting provision of care services for patients with cancer living in the rural area: an integrative review. *Aust J Cancer Nurs*. 2019;20(1).
18. Butow PN, Phillips F, Schweder J, White K, Underhill C, Goldstein D. Psychosocial well-being and supportive care needs of cancer patients living in urban and rural/regional areas: a systematic review. *Support Care Cancer*. 2012;20(1):1–22.
19. Burris JL, Andrykowski M. Disparities in mental health between rural and nonrural cancer survivors: a preliminary study. *Psycho-Oncol J Psychol Soc Behav Dimens Cancer*. 2010;19(6):637–645.
20. Beesley V, Eakin E, Steginga S, Aitken J, Dunn J, Battistutta D. Unmet needs of gynaecological cancer survivors: implications for developing community support services. *Psycho-Oncol J Psychol Soc Behav Dimens Cancer*. 2008;17(4):392–400.
21. Pateman KA, Cockburn NL, Batstone MD, Ford PJ. Quality of life of head and neck cancer patients in urban and regional areas: An Australian perspective. *Aust J Rural Health*. 2018;26(3):157–164.
22. Australian Bureau of Statistics. Australian Statistical Geography Standard (ASGS): Correspondences. Cat. No. 1270.0.55.006. [Internet]. Canberra: ABS; 2011. Available from: <https://www.abs.gov.au/AUSSTATS/abs@.nsf/DetailsPage/1270.0.55.006July%202011?OpenDocument> [Accessed 7 November 2019].
23. Australian Bureau of Statistics. ABS.Stat SEIFA by Local Government Area (LGA). [Internet]. Canberra: ABS; 2011. Available from: [http://stat.data.abs.gov.au/Index.aspx?DataSetCode=ABS\\_SEIFA\\_LGA](http://stat.data.abs.gov.au/Index.aspx?DataSetCode=ABS_SEIFA_LGA). [Accessed 7 November 2019].
24. Muthén Linda K, Muthén Bengt O. Mplus user's guide. Los Angel Muthen Muthen. 2007;
25. Antony MM, Bieling PJ, Cox BJ, Enns MW, Swinson RP. Psychometric properties of the 42-item and 21-item versions of the Depression Anxiety Stress Scales in clinical groups and a community sample. *Psychol Assess*. 1998;10(2):176.

26. Gomez F. A guide to the depression, anxiety and stress scale (DASS 21). Cent East Syd Prim Health Netw. 2016;
27. Fife BL. The measurement of meaning in illness. *Soc Sci Med*. 1995;40(8):1021–1028.
28. Richardson J, Sinha K, Iezzi A, Khan M. Modelling the utility of health states with the Assessment of Quality of Life (AQoL) 8D instrument: overview and utility scoring algorithm. *Res Pap 63 Cent Health Econ*. 2011;
29. Boyes A, Girgis A, Lecathelinais C. Brief assessment of adult cancer patients' perceived needs: development and validation of the 34-item Supportive Care Needs Survey (SCNS-SF34). *J Eval Clin Pract*. 2009;15(4):602–606.
30. Corp. I. IBM SPSS Statistics for Windows, Version 26. Armonk, NY: IBM Corp.; 2019.
31. Queensland Cancer Registry. unpublished data [Internet]. Available from: <https://cancerallianceqld.health.qld.gov.au/data-access/>
32. Prip A, Møller KA, Nielsen DL, Jarden M, Olsen M-H, Danielsen AK. The Patient–Healthcare Professional Relationship and Communication in the Oncology Outpatient Setting: A Systematic Review. *Cancer Nurs*. 2018;41(5):E11.
33. Jansen J, van Weert JC, de Groot J, van Dulmen S, Heeren TJ, Bensing JM. Emotional and informational patient cues: the impact of nurses' responses on recall. *Patient Educ Couns*. 2010;79(2):218–224.
34. van Osch M, Sep M, van Vliet LM, van Dulmen S, Bensing JM. Reducing patients' anxiety and uncertainty, and improving recall in bad news consultations. *Health Psychol*. 2014;33(11):1382.
35. Kane HL, Halpern MT, Squiers LB, Treiman KA, McCormack LA. Implementing and evaluating shared decision making in oncology practice. *CA Cancer J Clin*. 2014;64(6):377–388.
36. Schofield P, Chambers S. Effective, clinically feasible and sustainable: Key design features of psycho-educational and supportive care interventions to promote individualised self-management in cancer care. *Acta Oncol*. 2015;54(5):805–812.
37. Amir Z, Scully J, Borrill C. The professional role of breast cancer nurses in multi-disciplinary breast cancer care teams. *Eur J Oncol Nurs*. 2004;8(4):306–314.
38. Ralph N, Green A, Sara S, McDonald S, Norris P, Terry V, et al. Prostate cancer survivorship priorities for men and their partners: Delphi consensus from a nurse specialist cohort. *J Clin Nurs*. 2020;29(1–2):265–273.
39. Dunn J, Ralph N, Green A, Frydenberg M, Chambers SK. Contemporary consumer perspectives on prostate cancer survivorship: Fifty voices. *Psychooncology*. 2020;29(3):557–563.
40. Lovell NH, Redmond SJ, Basilakis J, Shany T, Celler BG. Telehealth technologies for managing chronic disease-experiences from Australia and the UK. In: 2010 Annual International Conference of the IEEE Engineering in Medicine and Biology. IEEE; 2010. p. 5267–5269.

1  
2  
3  
4  
5  
6  
7  
8  
9  
10  
11  
12  
13  
14  
15  
16  
17  
18  
19  
20  
21  
22  
23  
24  
25  
26  
27  
28  
29  
30  
31  
32  
33  
34  
35  
36  
37  
38  
39  
40  
41  
42  
43  
44  
45  
46  
47  
48  
49  
50  
51  
52  
53  
54  
55  
56  
57  
58  
59  
60

For peer review only

## Running head: REGIONAL AND REMOTE CANCER PATIENTS EXPERIENCES

Figure 1. Recruitment flowchart

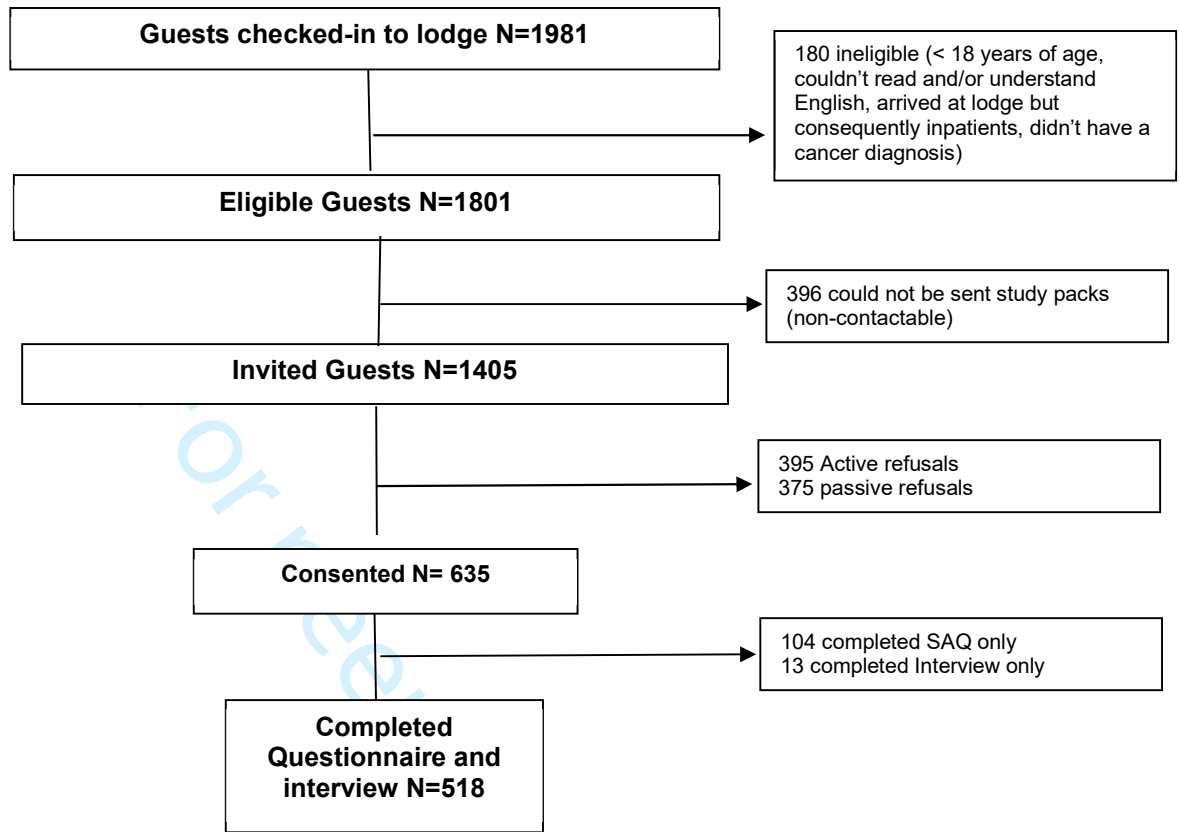

## Regional and remote cancer patients' experiences

25

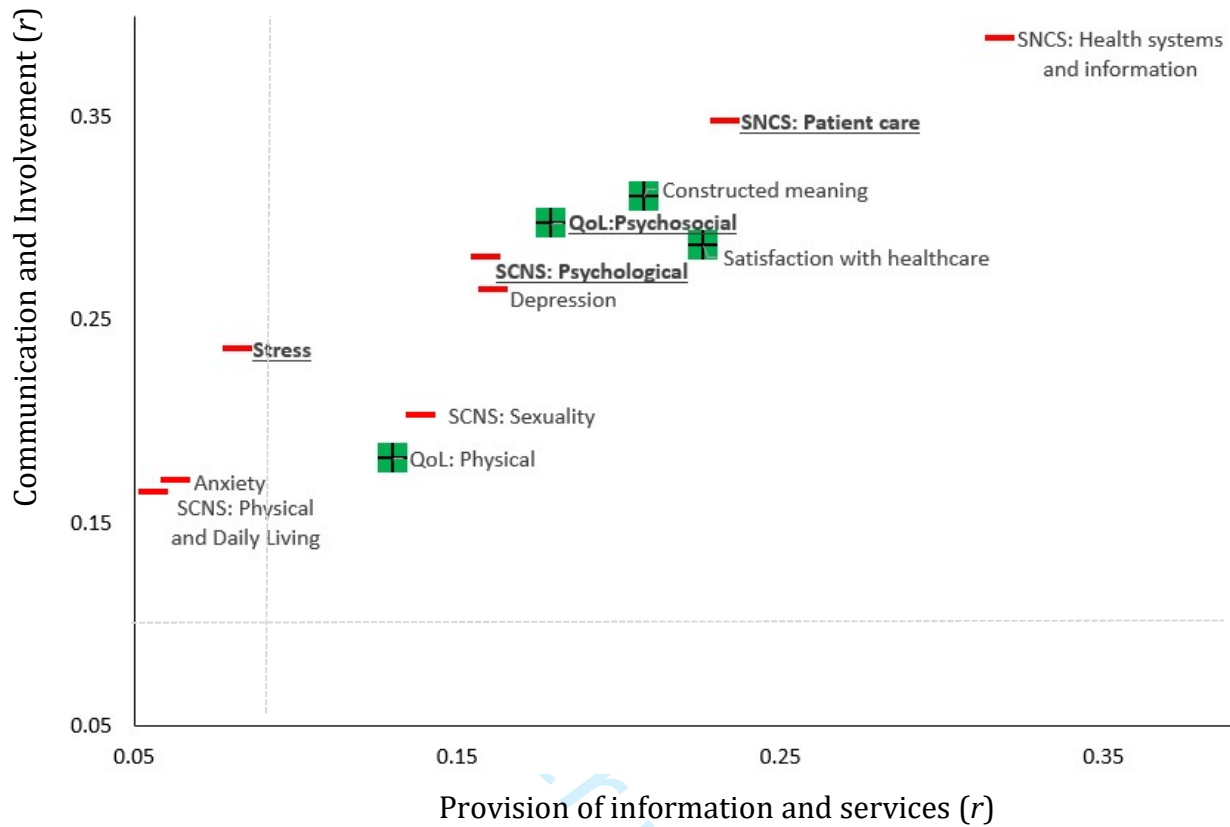

■ = Positive relationship with factor, — = Negative relationship with factor, **bold underlined** = significantly higher association with variable and communication and involvement factor,    = point at which beta weight is significant at <0.05

Figure 2. Visual comparison of the correlation co-efficients between each health/psychosocial variable and each factor.

## Applying National Cancer Control Indicators to Regional and Remote Cancer Patients' Experiences (Journal of Cancer Survivorship).

Jeff Dunn, Belinda C Goodwin ([belindagoodwin@cancerqld.org.au](mailto:belindagoodwin@cancerqld.org.au)), Joanne F. Aitken, Sonja March, Fiona Crawford-Williams, Michael J. Ireland, Nicholas Ralph, Leah Zajdlewicz, Arlen Rowe, and Suzanne K. Chambers.  
University of Southern Queensland & Cancer Council Queensland

Supplementary Table 1. Frequencies and percentages<sup>^</sup> of responses to NCCI – Patient Experience Items and grouping of binary responses.

|                                                                                                                                                     |                                           |                                                |                                                       |                                                           |                                     |
|-----------------------------------------------------------------------------------------------------------------------------------------------------|-------------------------------------------|------------------------------------------------|-------------------------------------------------------|-----------------------------------------------------------|-------------------------------------|
|                                                                                                                                                     | <b>Yes, I completely understood it</b>    | <b>Yes, I understood some of it</b>            | <b>No</b>                                             | <b>I can't remember</b>                                   |                                     |
| When you were told you had cancer, did you understand the explanation of what was wrong with you?                                                   | 345 (66.7%)                               | 153 (29.4%)                                    | 14 (2.7%)                                             | 5 (1.0%)                                                  |                                     |
|                                                                                                                                                     | <b>Yes, and it was easy to understand</b> | <b>Yes, and it was difficult to understand</b> | <b>No</b>                                             | <b>I did not need written information</b>                 | <b>I don't know/ can't remember</b> |
| When you were told you had cancer, were you given written information about the type of cancer you had?                                             | 262 (51.3%)                               | 54 (10.6%)                                     | 134 (26.2%)                                           | 44 (8.6%)                                                 | 17 (3/3%)                           |
|                                                                                                                                                     | <b>Yes</b>                                | <b>No</b>                                      | <b>I don't know/ can't remember</b>                   |                                                           |                                     |
| Have you been offered a written assessment and care plan                                                                                            | 159 (31.0%)                               | 265 (51.7%)                                    | 89 (17.3%)                                            |                                                           |                                     |
|                                                                                                                                                     | <b>Yes</b>                                | <b>No</b>                                      | <b>I don't know/ can't remember</b>                   |                                                           |                                     |
| Were you given the name of a Clinical Nurse Specialist who would support you through your treatment?                                                | 317 (61.8%)                               | 143 (27.9%)                                    | 53 (10.2%)                                            |                                                           |                                     |
|                                                                                                                                                     | <b>Yes, definitely</b>                    | <b>Yes, to some extent</b>                     | <b>No, but I would have liked to be more involved</b> | <b>I don't know/can't remember</b>                        |                                     |
| Were you involved as much as you wanted to be in decisions about your care and treatment?                                                           | 305 (59.2%)                               | 161 (31.3%)                                    | 36 (6.9%)                                             | 13 (2.5%)                                                 |                                     |
|                                                                                                                                                     | <b>Yes, definitely</b>                    | <b>Yes, to some extent</b>                     | <b>No</b>                                             | <b>I didn't know my treatment was being discussed ...</b> |                                     |
| Do you think your views were taken into account when the team of doctors and nurses caring for you were discussing which treatment you should have? | 294 (57.8%)                               | 152 (29.2%)                                    | 31 (6.1%)                                             | 17 (2.9%)                                                 |                                     |
|                                                                                                                                                     | <b>Yes, definitely</b>                    | <b>Yes, to some extent</b>                     | <b>No</b>                                             | <b>I did not need an explanation</b>                      | <b>I don't know/ can't remember</b> |
| Were the possible side effects of treatment(s) explained in a way you could understand?                                                             | 338 (65.5%)                               | 136 (26.4%)                                    | 30 (5.8%)                                             | 2 (0.4%)                                                  | 10 (1.9%)                           |
|                                                                                                                                                     | <b>Yes, and it was easy to understand</b> | <b>Yes, and it was difficult to understand</b> | <b>No</b>                                             | <b>I don't know/ can't remember</b>                       |                                     |
| Before you started your treatment, were you given written information about the side effects of treatment(s)?                                       | 354 (69.4%)                               | 54 (10.6%)                                     | 73 (14.3%)                                            | 29 (5.7%)                                                 |                                     |

<sup>^</sup>valid percentage, calculated based on non-missing data ----- = coded as yes, ----- = coded as no, no border = treated as missing



STROBE 2007 (v4) Statement—Checklist of items that should be included in reports of cross-sectional studies

| Section/Topic             | Item # | Recommendation                                                                                                                                                                       | Reported on page # |
|---------------------------|--------|--------------------------------------------------------------------------------------------------------------------------------------------------------------------------------------|--------------------|
| Title and abstract        | 1      | (a) Indicate the study’s design with a commonly used term in the title or the abstract                                                                                               | 3                  |
|                           |        | (b) Provide in the abstract an informative and balanced summary of what was done and what was found                                                                                  | 3                  |
| <b>Introduction</b>       |        |                                                                                                                                                                                      |                    |
| Background/rationale      | 2      | Explain the scientific background and rationale for the investigation being reported                                                                                                 | 5,6                |
| Objectives                | 3      | State specific objectives, including any prespecified hypotheses                                                                                                                     | 6                  |
| <b>Methods</b>            |        |                                                                                                                                                                                      |                    |
| Study design              | 4      | Present key elements of study design early in the paper                                                                                                                              | 7                  |
| Setting                   | 5      | Describe the setting, locations, and relevant dates, including periods of recruitment, exposure, follow-up, and data collection                                                      | 7                  |
| Participants              | 6      | (a) Give the eligibility criteria, and the sources and methods of selection of participants                                                                                          | 7                  |
| Variables                 | 7      | Clearly define all outcomes, exposures, predictors, potential confounders, and effect modifiers. Give diagnostic criteria, if applicable                                             | 7-13               |
| Data sources/ measurement | 8*     | For each variable of interest, give sources of data and details of methods of assessment (measurement). Describe comparability of assessment methods if there is more than one group | 7-13               |
| Bias                      | 9      | Describe any efforts to address potential sources of bias                                                                                                                            | 13 & 23            |
| Study size                | 10     | Explain how the study size was arrived at                                                                                                                                            | 7                  |
| Quantitative variables    | 11     | Explain how quantitative variables were handled in the analyses. If applicable, describe which groupings were chosen and why                                                         | 13                 |
| Statistical methods       | 12     | (a) Describe all statistical methods, including those used to control for confounding                                                                                                | 13                 |
|                           |        | (b) Describe any methods used to examine subgroups and interactions                                                                                                                  | 13                 |
|                           |        | (c) Explain how missing data were addressed                                                                                                                                          | 14                 |
|                           |        | (d) If applicable, describe analytical methods taking account of sampling strategy                                                                                                   | -                  |
|                           |        | (e) Describe any sensitivity analyses                                                                                                                                                | -                  |
| <b>Results</b>            |        |                                                                                                                                                                                      |                    |

|                          |     |                                                                                                                                                                                                              |                  |
|--------------------------|-----|--------------------------------------------------------------------------------------------------------------------------------------------------------------------------------------------------------------|------------------|
| Participants             | 13* | (a) Report numbers of individuals at each stage of study—eg numbers potentially eligible, examined for eligibility, confirmed eligible, included in the study, completing follow-up, and analysed            | 7 (figure)       |
|                          |     | (b) Give reasons for non-participation at each stage                                                                                                                                                         | 7 (figure)       |
|                          |     | (c) Consider use of a flow diagram                                                                                                                                                                           | 7 (figure)       |
| Descriptive data         | 14* | (a) Give characteristics of study participants (eg demographic, clinical, social) and information on exposures and potential confounders                                                                     | 14               |
|                          |     | (b) Indicate number of participants with missing data for each variable of interest                                                                                                                          | 15 – 16 (tables) |
| Outcome data             | 15* | Report numbers of outcome events or summary measures                                                                                                                                                         | 15 – 16 (tables) |
| Main results             | 16  | (a) Give unadjusted estimates and, if applicable, confounder-adjusted estimates and their precision (eg, 95% confidence interval). Make clear which confounders were adjusted for and why they were included | -                |
|                          |     | (b) Report category boundaries when continuous variables were categorized                                                                                                                                    | 15-16            |
|                          |     | (c) If relevant, consider translating estimates of relative risk into absolute risk for a meaningful time period                                                                                             | -                |
| Other analyses           | 17  | Report other analyses done—eg analyses of subgroups and interactions, and sensitivity analyses                                                                                                               | 18-20            |
| <b>Discussion</b>        |     |                                                                                                                                                                                                              |                  |
| Key results              | 18  | Summarise key results with reference to study objectives                                                                                                                                                     | 21               |
| Limitations              | 19  | Discuss limitations of the study, taking into account sources of potential bias or imprecision. Discuss both direction and magnitude of any potential bias                                                   | 22               |
| Interpretation           | 20  | Give a cautious overall interpretation of results considering objectives, limitations, multiplicity of analyses, results from similar studies, and other relevant evidence                                   | 21,22            |
| Generalisability         | 21  | Discuss the generalisability (external validity) of the study results                                                                                                                                        | 22               |
| <b>Other information</b> |     |                                                                                                                                                                                                              |                  |
| Funding                  | 22  | Give the source of funding and the role of the funders for the present study and, if applicable, for the original study on which the present article is based                                                | 2                |

\*Give information separately for cases and controls in case-control studies and, if applicable, for exposed and unexposed groups in cohort and cross-sectional studies.

**Note:** An Explanation and Elaboration article discusses each checklist item and gives methodological background and published examples of transparent reporting. The STROBE checklist is best used in conjunction with this article (freely available on the Web sites of PLoS Medicine at <http://www.plosmedicine.org/>, Annals of Internal Medicine at <http://www.annals.org/>, and Epidemiology at <http://www.epidem.com/>). Information on the STROBE Initiative is available at [www.strobe-statement.org](http://www.strobe-statement.org).

# BMJ Open

## Applying National Cancer Control Indicators to Regional and Remote Cancer Patients' Experiences

|                                 |                                                                                                                                                                                                                                                                                                                                                                                                                                                                                                                                                                                                                                                                                                                                                                                            |
|---------------------------------|--------------------------------------------------------------------------------------------------------------------------------------------------------------------------------------------------------------------------------------------------------------------------------------------------------------------------------------------------------------------------------------------------------------------------------------------------------------------------------------------------------------------------------------------------------------------------------------------------------------------------------------------------------------------------------------------------------------------------------------------------------------------------------------------|
| Journal:                        | <i>BMJ Open</i>                                                                                                                                                                                                                                                                                                                                                                                                                                                                                                                                                                                                                                                                                                                                                                            |
| Manuscript ID                   | bmjopen-2020-042507.R1                                                                                                                                                                                                                                                                                                                                                                                                                                                                                                                                                                                                                                                                                                                                                                     |
| Article Type:                   | Original research                                                                                                                                                                                                                                                                                                                                                                                                                                                                                                                                                                                                                                                                                                                                                                          |
| Date Submitted by the Author:   | 21-Oct-2020                                                                                                                                                                                                                                                                                                                                                                                                                                                                                                                                                                                                                                                                                                                                                                                |
| Complete List of Authors:       | Dunn, Jeff; Prostate Cancer Foundation of Australia; University of Southern Queensland - Springfield Campus, Goodwin, Belinda; Cancer Council Queensland, ; University of Southern Queensland - Springfield Campus, Aitken, Joanne; Cancer Council Queensland, Cancer Research Centre March, Sonja; University of Southern Queensland, School of Psychology and Counselling; University of Southern Queensland Crawford-Williams, Fiona; University of Southern Queensland Ireland, Michael; University of Southern Queensland, Psychology and Counselling<br>Ralph, Nicholas; University of Southern Queensland<br>Zajdlewicz, Leah; Cancer Council Queensland<br>Rowe, Arlen; University of Southern Queensland<br>Chambers, Suzanne; University of Technology Sydney Faculty of Health, |
| <b>Primary Subject Heading</b>: | Public health                                                                                                                                                                                                                                                                                                                                                                                                                                                                                                                                                                                                                                                                                                                                                                              |
| Secondary Subject Heading:      | Oncology, Health services research                                                                                                                                                                                                                                                                                                                                                                                                                                                                                                                                                                                                                                                                                                                                                         |
| Keywords:                       | HEALTH SERVICES ADMINISTRATION & MANAGEMENT, Quality in health care < HEALTH SERVICES ADMINISTRATION & MANAGEMENT, Adult oncology < ONCOLOGY, Organisation of health services < HEALTH SERVICES ADMINISTRATION & MANAGEMENT                                                                                                                                                                                                                                                                                                                                                                                                                                                                                                                                                                |
|                                 |                                                                                                                                                                                                                                                                                                                                                                                                                                                                                                                                                                                                                                                                                                                                                                                            |

SCHOLARONE™  
Manuscripts

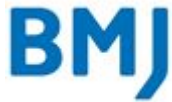

I, the Submitting Author has the right to grant and does grant on behalf of all authors of the Work (as defined in the below author licence), an exclusive licence and/or a non-exclusive licence for contributions from authors who are: i) UK Crown employees; ii) where BMJ has agreed a CC-BY licence shall apply, and/or iii) in accordance with the terms applicable for US Federal Government officers or employees acting as part of their official duties; on a worldwide, perpetual, irrevocable, royalty-free basis to BMJ Publishing Group Ltd ("BMJ") its licensees and where the relevant Journal is co-owned by BMJ to the co-owners of the Journal, to publish the Work in this journal and any other BMJ products and to exploit all rights, as set out in our [licence](#).

The Submitting Author accepts and understands that any supply made under these terms is made by BMJ to the Submitting Author unless you are acting as an employee on behalf of your employer or a postgraduate student of an affiliated institution which is paying any applicable article publishing charge ("APC") for Open Access articles. Where the Submitting Author wishes to make the Work available on an Open Access basis (and intends to pay the relevant APC), the terms of reuse of such Open Access shall be governed by a Creative Commons licence – details of these licences and which [Creative Commons](#) licence will apply to this Work are set out in our licence referred to above.

Other than as permitted in any relevant BMJ Author's Self Archiving Policies, I confirm this Work has not been accepted for publication elsewhere, is not being considered for publication elsewhere and does not duplicate material already published. I confirm all authors consent to publication of this Work and authorise the granting of this licence.

# Applying National Cancer Control Indicators to Regional and Remote Cancer Patients' Experiences

Jeff Dunn<sup>a-e</sup>, Belinda C. Goodwin<sup>\*, a,b</sup>, Joanne F. Aitken<sup>a-c,f</sup>, Sonja March<sup>b,g</sup>, Fiona Crawford-Williams<sup>b</sup>, Michael J. Ireland<sup>b,g</sup>, Nicholas Ralph<sup>b,e</sup>, Leah Zajdlewicz<sup>a</sup>, Arlen Rowe<sup>b,g</sup>, and Suzanne K. Chambers<sup>b,c,e,h</sup>

\*Corresponding author:  
Cancer Council Queensland  
553 Gregory Terrace, Fortitude Valley, QLD, 4006  
[belindagoodwin@cancerqld.org.au](mailto:belindagoodwin@cancerqld.org.au)

<sup>a</sup> Cancer Council Queensland, Brisbane, Australia

<sup>b</sup> Centre for Health Research, University of Southern Queensland, Springfield, QLD, Australia

<sup>c</sup> Menzies Health Institute Queensland, Griffith University, Mt Gravatt, QLD, Australia

<sup>d</sup> Prostate Cancer Foundation of Australia, Sydney, NSW, Australia

<sup>e</sup> Faculty of Health, University of Technology Sydney, NSW, Australia

<sup>f</sup> School of Public Health, The University of Queensland, Springfield, QLD, Australia

<sup>g</sup> School of Psychology and Counselling, University of Southern Queensland, Springfield, QLD, Australia

<sup>h</sup> Exercise Medicine Research Institute, Edith Cowan University, Perth, Australia

## Acknowledgements

We would like to thank the research participants for taking part in the study and the Cancer Council Queensland volunteers and lodge staff who assisted with recruitment and data collection and entry. We also acknowledged the efforts of research team members Anna Stiller (Pamo Lozang) and Zina Ndugwa in assisting with project and data management.

**Word count:** 4109

**Declarations****Conflict of interest**

The authors declare that they have no conflict of interest.

**Funding**

The study was funded by The University of Southern Queensland and Cancer Council Queensland. Award/Grant number is not applicable.

**Ethical Approval**

The questionnaire and methodology for this study was approved by the Human Research Ethics committee of the University of Southern Queensland (Ethics approval number: ref. H17REA152).

**Consent to participate**

Informed consent was obtained from all individual participants included in the study.

**Data availability statement**

The data that support the findings of this study are available from the corresponding author upon reasonable request.

**Author Contribution Statement**

JD, BG, JFA, SM, FCW, MJI, NR, LZ, AR, & SKC contributed to the study conception and design. Material preparation and data collection were conducted by BG, FCW, AR, & LZ and analyses were performed by BG and MI. The first draft of the manuscript was written by JD and SKC and JD, BG, JFA, SM, FCW, MJI, NR, LZ, AR, & SKC provided substantial contributions in revising the manuscript and approved the final manuscript.

## ABSTRACT

**Objectives:** To examine the health services experience of cancer patients from regional and remote Australia using the Australian National Cancer Control Indicators (NCCI) guidelines as an assessment framework.

**Design:** Cross-sectional.

**Setting:** Queensland non-for-profit cancer accommodation lodges.

**Participants:** Participants were cancer patients who travelled for treatment from rural and remote Queensland to major urban centres ( $n=518$ ; age  $M = 64.6$ ,  $SD = 11.18$ ).

**Outcome measures:** Assessments included NCCI patient indicators, quality of life (QoL), psychological distress and unmet supportive care needs.

**Results:** The frequency at which NCCI indicators were met ranged from 37.5% for receiving an assessment and care plan to 97.3% for understanding explanations about diagnosis.

Middle school educated participants were more likely than those with senior level education or higher to receive an assessment and care plan ( $OR = 1.90$ ,  $CI = 1.23 - 2.91$ ) and to report having their views on treatment taken into account ( $OR = 2.22$ ,  $CI = 1.49 - 3.33$ ). Patients with breast or prostate cancer reported better communication and patient involvement and information and services provision ( $r = p < .001$ ) compared to those with skin and head and neck cancer. When compared to information and service provision, communication and patient involvement showed stronger positive associations with QoL ( $z = 2.03$ ,  $p = .042$ ), psychosocial ( $z = 2.05$ ,  $p = .040$ ), and patient care ( $z = 2.00$ ,  $p = .046$ ) outcomes.

**Conclusion:** The patient care experience varies across the NCCI indicators by sociodemographic and clinical factors that likely reflects health care system biases. Perceptions about communication and involvement appear most critical for optimal outcomes and should be a priority action area for cancer control.

1  
2  
3 **Keywords:** cancer; health service; information; communication; patient experiences; cancer  
4  
5 control.

6  
7  
8 **Strengths and limitations of this study**  
9

- 10  
11  
12 • This large representative sample was recruited from a state-wide jurisdiction and so  
13 likely represents the actual experience of patients from regional and remote Australia.  
14  
15  
16  
17 • This study was cross-sectional therefore causality cannot be assumed.  
18  
19  
20  
21 • This study was aimed at gaining an insight into the experiences of regional and  
22 remote cancer patients, hence findings are not generalisable to urbanised populations.  
23  
24  
25  
26  
27  
28  
29  
30  
31  
32  
33  
34  
35  
36  
37  
38  
39  
40  
41  
42  
43  
44  
45  
46  
47  
48  
49  
50  
51  
52  
53  
54  
55  
56  
57  
58  
59  
60



## INTRODUCTION

In Australia, as in other high income countries, cancer care delivery systems continue to be tested by increasing cancer prevalence due to an aging population and increasing survival. (1) Compounding this, widening socioeconomic and geographic inequities in cancer outcomes, (2) increasing healthcare costs, and workforce shortages (3,4) are all exacerbated by rapidly expanding, and complex, cancer diagnostic and treatment options. (5) In response, national societies and cancer control agencies globally have developed frameworks and guidelines for quality care cancer services that typically include characteristics such as being person-centered and tailored, evidence-based, coordinated, multi-disciplinary, quality assured and accountable. (6–9) While many of these guidelines focus on treatment, supportive and psychosocial care is also a central feature. For example, the first (of eight) recommendations from the Institute of Medicine 2013 report centers on patients and families receiving understandable information about all aspects of their cancer care. (8) The Australian Government's guides to best-practice cancer care, the Optimal Cancer Care Pathways, list access to supportive care, including survivorship, as a key theme across all steps of the care pathway. (7) Similarly, risk stratified pathways of cancer care in the UK emphasize assessing and supporting holistic patient needs, including those that are psychosocial and spiritual. While such frameworks are important, the question arises as to how cancer services might best evaluate the extent to which cancer care is meeting these recommendations, where gaps most exist, and crucially who is more vulnerable to underservicing.

A number of groups have developed indicators to reflect the extent to which optimal care is being delivered in terms of information, communication, education and care-coordination during diagnosis and treatment. (10,11) Thus far this been for quality assurance purposes within administering jurisdictions with findings not generally presented within the peer-reviewed literature. A set of items was recently developed by Cancer Australia for

1  
2 monitoring cancer patient experiences at the national level. The National Cancer Control  
3 Indicators (NCCI) patient experiences items are based on the National Health Service (NHS)  
4 England Cancer Patient Experience Survey, (12) and reflect the receipt and understanding of  
5 information about diagnosis and side effects of treatment as well as patient involvement in  
6 care and decision making, and the provision of care co-ordination tools and services. To date,  
7 results from the Australian NCCI indicators for patient experience have not been reported.  
8  
9  
10  
11  
12  
13  
14  
15

16 It is especially important to consider the quality of the patient experience for people  
17 who live in geographically remote locations. People with cancer living in remote locations  
18 incur the additional burden of having to travel long distances to attend specialist treatment  
19 facilities that are not available in sparsely populated and geographically remote areas of the  
20 country. (13) Cancer patients who live outside of major cities in Australia are known to  
21 experience poorer cancer outcomes (14,15) and report poor physical and mental health,  
22 (16,17) lower quality of life (QoL) (18,19) and unmet supportive care needs (18,20,21)  
23 compared to their urban counterparts.  
24  
25  
26  
27  
28  
29  
30  
31  
32  
33

34 Accordingly, the present study applied the NCCI guidelines as a framework to  
35 examine the health services experience of cancer patients and their families from regional and  
36 remote Australia experiencing geographic dislocation while obtaining cancer treatment. In  
37 doing so: 1) the construct validity of the NCCI guidelines was examined, 2) the extent to  
38 which these guidelines are currently being met was tested, 3) sociodemographic predictors of  
39 underservicing were explored, and 4) how psychosocial outcomes, unmet supportive care  
40 needs, satisfaction with health care were related to underservice were described.  
41  
42  
43  
44  
45  
46  
47  
48  
49  
50

## 51 **METHOD**

### 52 **Patient and Public Involvement Statement**

53 Patient and public involvement in the design and conduct of the study was sought from  
54 community members, research volunteers, and pilot study participants. Several community  
55 members including cancer survivors living in rural areas reviewed interview and  
56  
57  
58  
59  
60

1  
2  
3 questionnaire items providing feedback on the clarity, formatting, and time to complete. The  
4  
5 research volunteers tested and evaluated materials and protocols while patients provided  
6  
7 written and verbal feedback to researchers regarding clarity, burden and relevance associated  
8  
9 with completing study materials. Minor refinements to the study materials to were made to  
10  
11 increase clarity and ease of delivery based on this feedback.  
12  
13

## 14 **Participants**

15  
16 Participants (n = 518) were cancer patients from regional and remote Queensland  
17  
18 staying at six Cancer Council Queensland (CCQ) lodges. CCQ is a not for profit organization  
19  
20 offering a range of services to those affected by cancer, one of those being the  
21  
22 accommodation lodges which aim to limit out of pocket expenses for patients. People who  
23  
24 are diagnosed with cancer, who are required to travel for their treatment, may receive a  
25  
26 referral to stay at one of the CCQ lodges from their healthcare team. Accommodation costs  
27  
28 are determined in conjunction with the patient's eligibility for the Queensland government's  
29  
30 Patient Travel Subsidy Scheme which is designed to assist in the cost of travel to the nearest  
31  
32 specialist medical service that is more than 50km from the patients nearest hospital. [Figure 1](#)  
33  
34 depicts participant recruitment flow. Eligibility criteria were: 18 years or older, able to read  
35  
36 and understand English, and staying at a CCQ lodge for cancer treatment. A total of 1405 of  
37  
38 1801 eligible CCQ lodge guests staying between September 11<sup>th</sup>, 2017 and 1<sup>st</sup> February, 2020  
39  
40 were provided with an invitation pack containing study details, consent forms and a  
41  
42 questionnaire. Three hundred and ninety-six eligible guests were not approached as contact  
43  
44 details were not provided or accurate.  
45  
46  
47  
48  
49

50  
51 Invitation packs were distributed upon arrival by lodge staff or, if this was not  
52  
53 possible (e.g., after hours check-in) were sent via mail to their home address. Patients were  
54  
55 contacted by phone one week after pack distribution, offered further details and invited to  
56  
57 participate. Assessments included a self-administered questionnaire and face-to-face (or  
58  
59  
60

1  
2 telephone) interview at baseline, followed by self-administered questionnaires at 3 months,  
3  
4  
5 12 months and annually thereafter.

6  
7 Of the eligible patients who received an invitation pack (n=1405), 635 (45.2%)  
8  
9 consented to participate, 395 (28.1%) actively refused, and 375 (26.7%) did not return a  
10  
11 consent form and could not be re-contacted. This report focusses on data collected at baseline  
12  
13 for a sample of 518 consenting participants who completed both the questionnaire and  
14  
15 interview component of the study. Based on the available names and addresses of non-  
16  
17 respondents it could be estimated that responders and non-responders did not differ  
18  
19 significantly according to gender, remoteness, or socio-economic status.  
20  
21  
22

### 23 **Materials and measures**

24  
25 Questionnaires assessed demographic and patient characteristics, patient experiences  
26  
27 according to the NCCI, psychological distress and cognitive adjustment, satisfaction with  
28  
29 healthcare, QoL, and supportive care needs. Structured interviews assessed diagnostic and  
30  
31 treatment pathways. The study has approval from a recognized institutional Human Research  
32  
33 Ethics Committee (ref. H17REA152).

#### 34 Demographics and patient characteristics

35  
36  
37 Site of current cancer, gender, age, country of birth, highest level of education, and  
38  
39 household income were reported by each participant. Participant's residential street address at  
40  
41 baseline was geocoded and mapped to the 2011 SA2 boundaries using MapMarker®  
42  
43 Australia Version 15.16.0.21 and MapInfo Pro® Version 15.0 and classified by Remoteness  
44  
45 Area (22) and Socio-Economic Indexes for Areas (SEIFA). (23) Most recently diagnosed  
46  
47 primary cancer site was obtained via self-report and verified against the population-based  
48  
49 Queensland Cancer Register (QCR). Self-report data were relied upon where diagnosis could  
50  
51 not be verified by the QCR (n=39), for example if the patient had non-melanoma skin cancer  
52  
53 (which is not routinely notified to registries in Australia) or the patient's diagnosis had not  
54  
55 yet been notified to the QCR.  
56  
57  
58  
59  
60

## National Cancer Control Indicators - patient experience

Eight items derived from the National Health Service (NHS) England Cancer Patient Experience Survey (10) were adapted by Cancer Australia (12) as measures of National Cancer Control Indicators (NCCI) of cancer patient experiences. The items captured four key elements including 1) Patient information, communication and education during diagnosis; 2) Patient information, communication and education during; 3) Patient co-ordination and integration of care, continuity and transition; 4) Respect for patient preference. Response scales for each item vary including 3 category (e.g., yes, no, I don't know/remember) and 4 category (e.g., yes, yes to some extent, no, I don't know/remember) response options. Responses to each NCCI item were collapsed into a yes/no binary response with those responding with "I don't know" or "I don't remember" coded as missing. Full item wording, response categories and method for collapsing responses is available in as supplementary material (Supplementary Table 1).

As the NCCI items have not been validated for use in research an exploratory factor analysis was conducted for the current sample. One to four-factor solutions were extracted sequentially using Mplus v.8 software. (24). The decision on the number of factors to retain was driven by 1) overall and comparative model fit (determined by  $\chi^2$  and  $\Delta\chi^2$  and their corresponding p values), 2) balancing the trade-off between explanatory power and parsimony (determined by the Bayesian and the Akaike information criteria), and 3) an interpretable pattern of strong and non-cross-loading factor loadings.

For the one to three-factor solutions, overall model fit improved as a function of the number of factors extracted (see [Table 1](#)). However, the four-factor solution yielded a poorer fit than the three-factor solution according to both  $\chi^2$  and information criteria values and was not considered a candidate solution. The Bayesian information criterion shows that the three-factor solution exhibited poorer fit compared to the two-factor solution once model complexity was accounted for. Therefore, the two-factor solution represented the best trade-

1  
2  
3 off of explanatory power and parsimony. Finally, the two-factor solution also yielded a  
4  
5 simple structure in the pattern of item loadings. Each NCCI item loaded cleanly onto one of  
6  
7 each of the two factors (see [Table 2](#)); the first reflecting effective communication and patient  
8  
9 involvement the second reflecting the provision of information or services. A confirmatory  
10  
11 factor analytic approach was used to calculate factor score variables for the communication  
12  
13 and patient involvement and provision of information and services. Factor score variables  
14  
15 were transformed so that scores ranged from 0 (low) to 1.68 (high) for the communication  
16  
17 and patient involvement factor and 0 (low) to 1.84 (high) for the provision of information and  
18  
19 services factor.  
20  
21  
22  
23  
24  
25  
26  
27  
28  
29  
30  
31  
32  
33  
34  
35  
36  
37  
38  
39  
40  
41  
42  
43  
44  
45  
46  
47  
48  
49  
50  
51  
52  
53  
54  
55  
56  
57  
58  
59  
60

Table 1. Comparative fit statistics for one to four factor EFA solutions

|                                      | 1-factor        | 2-factor       | 3-factor       | 4-factor                      |
|--------------------------------------|-----------------|----------------|----------------|-------------------------------|
| <b>AIC</b>                           | 3848.70         | 3784.24        | 3775.34        | 3787.09                       |
| <b><math>\Delta</math>AIC</b>        | -               | 64.46          | 8.89           | -11.74                        |
| <b>BIC</b>                           | 3916.70         | 3881.99        | 3898.59        | 3931.59                       |
| <b><math>\Delta</math>BIC</b>        | -               | 34.71          | -16.61         | -32.99                        |
| <b><math>\chi^2</math> (p)</b>       | 435.96 (< .001) | 306.55 (.001)  | 207.71 (.776)  | 225.45 (.368)                 |
| <b><math>\Delta\chi^2</math> (p)</b> | -               | 84.76 (< .001) | 40.37 (< .001) | ( $\Delta\chi^2$ is negative) |

For peer review only

Table 2. Exploratory factor analysis item loadings for two-factor solution

| Item                                                                                                                                                | Communication<br>and patient<br>involvement | Provision of<br>information and<br>services |
|-----------------------------------------------------------------------------------------------------------------------------------------------------|---------------------------------------------|---------------------------------------------|
| Do you think your views were taken into account when the team of doctors and nurses caring for you were discussing which treatment you should have? | <b>0.884*</b>                               | 0.005                                       |
| Were you involved as much as you wanted to be in decisions about your care and treatment?                                                           | <b>0.925*</b>                               | -0.063                                      |
| Were the possible side effects of treatment(s) explained in a way you could understand?                                                             | <b>0.507*</b>                               | 0.249*                                      |
| When you were told you had cancer, did you understand the explanation of what was wrong with you?                                                   | <b>0.633*</b>                               | 0.059                                       |
| Have you been offered a written assessment and care plan?                                                                                           | 0.185                                       | <b>0.579*</b>                               |
| When you were told you had cancer, were you given written information about the type of cancer you had?                                             | 0.075                                       | <b>0.579*</b>                               |
| Before you started your treatment, were you given written information about the side effects of treatment(s)?                                       | 0.002                                       | <b>0.719*</b>                               |
| Were you given the name of a Clinical Nurse Specialist who would support you through your treatment?                                                | -0.001                                      | <b>0.736*</b>                               |

Geomin Rotated Loadings (\* significant at 5% level)



## Running head: REGIONAL AND REMOTE CANCER PATIENTS EXPERIENCES

### Psychological distress and adjustment

Stress, anxiety and depression were measured using the 21-item Depression, Anxiety, and Stress Scale (DASS-21) (25). The scale asks respondents to indicate the degree to which each statement applied to them over the past week on a four-point Likert scale ranging from 0 = *not at all* to 3 = *almost always*. Scores for each subscale were summed and multiplied by 2, with higher scores indicating more distress. (26) Reliability for the anxiety ( $\alpha = .67$ ), stress ( $\alpha = .87$ ) and depression ( $\alpha = .90$ ) subscales were adequate to excellent.

Psychological adjustment to a cancer diagnosis was assessed using the Constructed Meaning Scale (CMS). The 8 item CMS measures a patients' cognitive response to being diagnosed with a life-threatening illness (27) on a 4-point Likert scale ranging from 1 = *strongly disagree* to 4 = *strongly agree*. Scores on the CMS reflect ability to construct a positive outlook regarding the effect that cancer has or will have on their future, their relationships, and their sense of self. Internal consistency in the current study was good ( $\alpha = .77$ ).

### Satisfaction with healthcare

Nine items were created by the researchers to assess patients' satisfaction with their health care in terms of the referral process, speed of diagnosis, speed of test results, the hospital where they were treated and the doctors and nurses, the emotional and physical support they receive in hospital and finally, and their medical care overall. Degree of satisfaction with each item was reported on a 5-point Likert scale ranging from 1 = *very dissatisfied* to 5 = *very satisfied*. Data and participant feedback from the pilot phase were examined to ensure items were clear and relevant and excellent internal consistency for the measure was evident ( $\alpha = .92$ ). Items were averaged to create a mean score.

### Quality of life

## Regional and remote cancer patients' experiences

Multidimensional QoL was measured using the 35-item Assessment of Quality of Life 8 Dimension instrument (AQoL-8D)(28). Participants responded on a 5-point Likert scale based on aspects of QoL during the past week. Responses are coded so that lower scores reflect poorer QoL on two psychometrically derived dimensions reflecting physical and psychological wellbeing. Internal reliability was evident for physical ( $\alpha = .64$ ) and psychological ( $\alpha = .92$ ) dimensions in the current study.

## Supportive care needs

Unmet need was measured using the Supportive Care Needs Survey Short Form-34 (SCNS-SF34). (29) The scale assesses patient need for support across five domains including physical and daily living, psychological, health systems and information, patient care and support, and sexuality with a single item regarding financial needs. Responses were coded: 0 (*no need/not applicable/need satisfied*), 1 (*low need*), 2 (*moderate need*), or 3 (*high need*) and means calculated resulting in six continuous variables reflecting the degree of need in each domain. Subscales showed excellent internal reliability (physical and daily living needs  $\alpha = .86$ ; psychological needs  $\alpha = .94$ ; health system and information needs  $\alpha = .95$ ; patient care and support needs  $\alpha = .88$ ; sexuality needs  $\alpha = .87$ ).

## Analysis

Data analyses were carried out in SPSS Version 26. (30) Frequencies and percentages were calculated for patient responses to each NCCI item. Demographics and area-level characteristic differences in the likelihood of reporting *yes* to a NCCI item were examined using chi-square statistics. A family-wise error rate adjustment was applied to constrain the chance of Type 1 errors to 5%. One-way analyses of variance (ANOVA) were used to identify group differences in NCCI factor scores. Pearson's point biserial correlations assessed whether age was associated with NCCI items and factors. Where group differences were significant, post-hoc contrasts were applied to compare each category against others.

## Regional and remote cancer patients' experiences

Odds ratios (OR) and 95% confidence intervals (CI) were reported for contrasts involving NCCI items. Associations between factor scores and health/psychosocial variables were assessed using a series of correlations with coefficients graphed and compared using a Fisher's *z*-test. Missing data were excluded from analyses in a pairwise manner.

## RESULTS

### Sample characteristics

Participant ages ranged from 26 to 93 ( $M = 64.6$ ,  $SD = 11.18$ ) and 47.3% of participants identified as female and 52.7% as male. Most participants were born in Australia (80.5%), with the remainder born in the UK (9.9%), New Zealand (4.7%), and other countries (4.9%). Most participants reported low income with 64.8% reporting a household income under \$50,000 a year (i.e., the median yearly gross income in Australia). Most patients were not fully covered by private health insurance (81.5%) and the majority lived in inner (44.0%) or outer (42.5%) regional areas marked by high levels of socio-economic disadvantage (i.e., 66.5% were in the lowest socio-economic quintiles). The most common primary cancers were breast (19.3%), head and neck (14.3%), and skin (12.6%). – see [Table 3](#). Referenced to population statistics (31), the current sample was representative of the non-metropolitan Queensland cancer population in terms of gender, age, and country of birth. However, patients with skin cancer were under-represented (24.5% in population) and patients with head and neck cancer were over-represented (5.8% in population). At the time of data collection, time since diagnosis for each participant ranged between and 33.7 years and 1 day (Median = 211 days), with 64% of participants diagnosed within the previous 12 months.

Running head: REGIONAL AND REMOTE CANCER PATIENTS EXPERIENCES

Table 3. Participant characteristics and responses to NCCI items with chi-square and ANOVA group comparisons.

|                           |                    | Communication and patient involvement |                             |                              |                              |                     | Provision of information and services |                                |                              |                                    |                     |
|---------------------------|--------------------|---------------------------------------|-----------------------------|------------------------------|------------------------------|---------------------|---------------------------------------|--------------------------------|------------------------------|------------------------------------|---------------------|
|                           | Total n (%)^       | Views on treatment n (%)              | Involved in decisions n (%) | Side effects explained n (%) | Understand Explanation n (%) | Factor Score M (SD) | Written info on type of cancer n (%)  | Assessment and care plan n (%) | Clinical nurse support n (%) | Written info on side effects n (%) | Factor Score M (SD) |
| <b>Gender</b>             |                    | $\chi^2 = 2.69$                       | $\chi^2 = 1.30$             | $\chi^2 = 0.32$              | $\chi^2 = 0.10$              | $F = 2.15$          | $\chi^2 = 7.88^*$                     | $\chi^2 = 0.23$                | $\chi^2 = 1.05$              | $\chi^2 = 1.46$                    | $F = 2.92$          |
| Female                    | <b>245 (52.7%)</b> | 147 (63.4%)                           | 149 (63.4%)                 | 156 (65.5%)                  | 234 (97.5%)                  | 1.17 (0.43)         | 163 (70.3%)                           | 73 (36.3%)                     | 157 (71.7%)                  | 199 (86.9%)                        | 1.36 (0.46)         |
| Male                      | <b>273 (47.3%)</b> | 147 (56.1%)                           | 165 (58.4%)                 | 182 (67.9%)                  | 263 (97.0%)                  | 1.11 (0.43)         | 152 (58.2%)                           | 86 (38.6%)                     | 160 (66.4%)                  | 209 (82.9%)                        | 1.21 (0.48)         |
| <b>Education</b>          |                    | $\chi^2 = 16.61^*$                    | 144 (68.2%)                 | $\chi^2 = 9.70^*$            | $\chi^2 = 0.84$              | $F = 9.24$          | $\chi^2 = 3.00$                       | $\chi^2 = 11.44^*$             | $\chi^2 = 6.39$              | $\chi^2 = 2.65$                    | $F = 7.46^*$        |
| Middle school (yr 10)     | <b>217 (42.3%)</b> | 146 (70.2%)                           | 41 (55.4%)                  | 155 (73.1%)                  | 205 (96.7%)                  | 1.23 (0.42)         | 141 (68.1%)                           | 85 (47.0%)                     | 141 (75.8%)                  | 176 (86.7%)                        | 1.27 (0.48)         |
| Senior school (yr 12)     | <b>78 (15.1%)</b>  | 39 (53.4%)                            | 117 (55.2%)                 | 41 (53.9%)                   | 76 (98.7%)                   | 1.05 (0.42)         | 44 (57.9%)                            | 17 (28.3%)                     | 47 (64.4%)                   | 55 (78.6%)                         | 1.07 (0.47)         |
| Trade/Tertiary            | <b>218 (42.5%)</b> | 107 (51.4%)                           | $\chi^2 = 0.06$             | 139 (65.3%)                  | 211 (97.2%)                  | 1.08 (0.42)         | 128 (62.4%)                           | 57 (31.8%)                     | 127 (64.8%)                  | 172 (84.7%)                        | 1.12 (0.46)         |
| <b>&gt; median income</b> |                    | $\chi^2 = 0.03$                       | 182 (59.7%)                 | $\chi^2 = 0.06$              | $\chi^2 = 2.17$              | $F = 0.09$          | $\chi^2 = 0.24$                       | $\chi^2 = 0.44$                | $\chi^2 = 1.46$              | $\chi^2 = 1.66$                    | $F = 0.01$          |
| Yes                       | <b>318 (65.3%)</b> | 73 (57.5%)                            | 144 (68.2%)                 | 84 (67.2%)                   | 126 (99.2%)                  | 1.14 (0.40)         | 81 (65.3%)                            | 37 (34.9%)                     | 77 (66.4%)                   | 103 (88.8%)                        | 1.17 (0.47)         |
| No                        | <b>169 (34.7%)</b> | 172 (58.3%)                           | 78 (60.9%)                  | 204 (66.0%)                  | 301 (96.8%)                  | 1.13 (0.44)         | 189 (62.8%)                           | 100 (38.6%)                    | 200 (72.5%)                  | 248 (83.8%)                        | 1.17 (0.48)         |
| <b>Born in Australia</b>  |                    | $\chi^2 = 0.01$                       | $\chi^2 = 0.15$             | $\chi^2 = 0.59$              | $\chi^2 = 1.62$              | $F = 0.18$          | $\chi^2 = 0.55$                       | $\chi^2 = 0.15$                | $\chi^2 = 0.43$              | $\chi^2 = 0.85$                    | $F = 0.02$          |
| Yes                       | <b>413 (80.5%)</b> | 233 (59.6%)                           | 238 (60.3%)                 | 261 (65.6%)                  | 387 (96.8%)                  | 1.32 (0.44)         | 246 (63.2%)                           | 127 (38.0%)                    | 248 (69.5%)                  | 322 (85.4%)                        | 1.17 (0.48)         |
| No                        | <b>100 (19.5%)</b> | 58 (59.8%)                            | 63 (62.4%)                  | 71 (69.6%)                   | 104 (99.0%)                  | 1.15 (0.42)         | 66 (67.3%)                            | 30 (35.7%)                     | 64 (66.0%)                   | 80 (81.6%)                         | 1.16 (0.45)         |
| <b>Full PHI cover</b>     |                    | $\chi^2 = 0.86$                       | $\chi^2 = 0.44$             | $\chi^2 = 0.10$              | $\chi^2 = 0.96$              | $F = 0.26$          | $\chi^2 = 0.32$                       | $\chi^2 = 0.05$                | $\chi^2 = 3.38$              | $\chi^2 = 0.85$                    | $F = 0.01$          |
| Yes                       | <b>91 (18.5%)</b>  | 55 (64.7%)                            | 56 (64.4%)                  | 57 (65.5%)                   | 85 (98.8%)                   | 1.16 (0.24)         | 55 (67.1%)                            | 27 (36.0%)                     | 48 (60.0%)                   | 73 (88.0%)                         | 1.17 (0.47)         |
| No                        | <b>400 (81.5%)</b> | 224 (59.3%)                           | 233 (60.5%)                 | 261 (67.3%)                  | 380 (96.9%)                  | 1.37 (0.44)         | 242 (63.7%)                           | 120 (37.4%)                    | 247 (70.6%)                  | 308 (83.9%)                        | 1.17 (0.48)         |
| <b>Cancer Site</b>        |                    | $\chi^2 = 4.97$                       | $\chi^2 = 8.65$             | $\chi^2 = 2.59$              | $\chi^2 = 1.37$              | $F = 2.29^*$        | $\chi^2 = 29.65^*$                    | $\chi^2 = 2.81$                | $\chi^2 = 46.11^*$           | $\chi^2 = 17.43^*$                 | $F = 8.03^*$        |
| Breast                    | <b>100 (19.3%)</b> | 65 (68.4%)                            | 66 (68.0%)                  | 60 (61.9%)                   | 97 (98.0%)                   | 1.23 (0.43)         | 78 (80.4%)                            | 33 (41.3%)                     | 87 (92.6%)                   | 84 (92.3%)                         | 1.36 (0.39)         |
| Skin                      | <b>65 (12.6%)</b>  | 38 (59.4%)                            | 32 (50.8%)                  | 39 (61.9%)                   | 62 (95.4%)                   | 1.05 (0.46)         | 29 (44.6%)                            | 19 (34.5%)                     | 27 (48.2%)                   | 43 (69.4%)                         | 0.97 (0.54)         |
| Head & Neck               | <b>74 (14.3%)</b>  | 39 (54.2%)                            | 48 (66.7%)                  | 51 (68.9%)                   | 71 (97.3%)                   | 1.14 (0.42)         | 37 (52.9%)                            | 26 (44.8%)                     | 39 (66.1%)                   | 60 (85.7%)                         | 1.16 (0.48)         |
| Prostate                  | <b>64 (12.3%)</b>  | 38 (62.3%)                            | 43 (67.2%)                  | 43 (68.3%)                   | 62 (98.4%)                   | 1.20 (0.41)         | 47 (75.8%)                            | 20 (37.7%)                     | 47 (81.0%)                   | 49 (80.3%)                         | 1.25 (0.45)         |
| Other                     | <b>215 (41.5%)</b> | 114 (56.4%)                           | 116 (56.3%)                 | 145 (69.4%)                  | 205 (97.2%)                  | 1.10 (0.24)         | 124 (62.3%)                           | 61 (34.3%)                     | 117 (60.6%)                  | 172 (87.3%)                        | 1.12 (0.46)         |
| <b>TOTAL</b>              | <b>518 (100%)</b>  | 294 (59.5%)                           | 305 (60.8%)                 | 338 (66.8%)                  | 498 (97.3%)                  | 1.14 (0.43)         | 316 (64.0%)                           | 159 (37.5%)                    | 317 (68.9%)                  | 408 (84.8%)                        | 1.17 (0.47)         |

PHI - Private Health Insurance. n (%) = number and percentage of participants in each demographic category responding yes to item, M (SD) = Mean and SD reported for factor scores, ^ valid percent calculated based on non-missing responses to this item, \* = p < .05 (applying family-wise error rate adjustment for multiple  $\chi^2$  tests)

Regional and remote cancer patients' experiences

Table 3 cont. Participant characteristic and responses to NCCI items with chi-square and ANOVA group comparisons.

|                           | Communication and patient involvement |                          |                             |                              |                              | Provision of information and services |                                      |                                |                              |                                    |                     |
|---------------------------|---------------------------------------|--------------------------|-----------------------------|------------------------------|------------------------------|---------------------------------------|--------------------------------------|--------------------------------|------------------------------|------------------------------------|---------------------|
|                           | Total n (%)                           | Views on treatment n (%) | Involved in decisions n (%) | Side effects explained n (%) | Understand explanation n (%) | Factor Score M (SD)                   | Written info on type of cancer n (%) | Assessment and care plan n (%) | Clinical nurse support n (%) | Written info on side effects n (%) | Factor Score M (SD) |
| <b>SEIFA Quintile</b>     |                                       | $\chi^2 = 5.29$          | $\chi^2 = 3.45$             | $\chi^2 = 4.04$              | $\chi^2 = 4.59$              | $F = 0.61$                            | $\chi^2 = 1.30$                      | $\chi^2 = 0.90$                | $\chi^2 = 5.58$              | $\chi^2 = 2.64$                    | $F = 0.41$          |
| 1 <sup>st</sup> (lowest)  | <b>185 (36.0%)</b>                    | 115 (64.2%)              | 110 (60.8%)                 | 129 (71.3%)                  | 180 (98.4%)                  | 1.17 (0.43)                           | 113 (63.8%)                          | 56 (37.3%)                     | 118 (71.1%)                  | 154 (88.0%)                        | 1.20 (0.46)         |
| 2 <sup>nd</sup>           | <b>155 (30.3%)</b>                    | 89 (60.5%)               | 93 (61.2%)                  | 99 (65.6%)                   | 147 (96.1%)                  | 1.12 (0.45)                           | 98 (65.8%)                           | 49 (38.9%)                     | 90 (65.7%)                   | 122 (82.4%)                        | 1.16 (0.49)         |
| 3 <sup>rd</sup>           | <b>112 (21.9%)</b>                    | 59 (57.3%)               | 59 (56.75)                  | 65 (60.2%)                   | 105 (95.5%)                  | 1.09 (0.44)                           | 66 (63.5%)                           | 36 (40.9%)                     | 71 (72.4%)                   | 82 (83.7%)                         | 1.17 (0.49)         |
| 4 <sup>th</sup>           | <b>54 (10.6%)</b>                     | 25 (47.2%)               | 37 (69.8%)                  | 37 (68.5%)                   | 54 (100.0%)                  | 1.12 (0.39)                           | 32 (59.3%)                           | 17 (34.7%)                     | 31 (64.6%)                   | 42 (82.4%)                         | 1.13 (0.48)         |
| 5 <sup>th</sup> (highest) | <b>5 (1.0%)</b>                       | 3 (60.0%)                | 2 (40.0%)                   | 3 (60.0%)                    | 5 (100.0%)                   | 1.04 (0.43)                           | 4 (80.0%)                            | 1 (25.0%)                      | 1 (25.0%)                    | 3 (75.0%)                          | 1.02 (0.041)        |
| <b>ARIA</b>               |                                       | $\chi^2 = 5.22$          | $\chi^2 = 3.35$             | $\chi^2 = 4.55$              | $\chi^2 = 2.66$              | $F = 0.48$                            | $\chi^2 = 0.99$                      | $\chi^2 = 4.67$                | $\chi^2 = 2.47$              | $\chi^2 = 0.94$                    | $F = 0.99$          |
| Major city                | <b>24 (4.7%)</b>                      | 9 (37.5%)                | 14 (58.3%)                  | 13 (54.2%)                   | 24 (100.0%)                  | 1.03 (0.44)                           | 17 (70.8%)                           | 10 (41.7%)                     | 14 (63.6%)                   | 20 (90.9%)                         | 1.17 (0.46)         |
| Inner regional            | <b>225 (44.0%)</b>                    | 128 (60.7%)              | 140 (63.6%)                 | 154 (70.3%)                  | 216 (97.3%)                  | 1.15 (0.38)                           | 139 (64.7%)                          | 61 (33.5%)                     | 133 (68.6%)                  | 177 (83.5%)                        | 1.16 (0.44)         |
| Outer regional            | <b>217 (42.5%)</b>                    | 128 (61.0%)              | 125 (60.4%)                 | 140 (65.7%)                  | 207 (96.3%)                  | 1.12 (0.47)                           | 129 (62.3%)                          | 76 (43.4%)                     | 134 (68.0%)                  | 172 (85.1%)                        | 1.19 (0.52)         |
| Remote                    | <b>23 (4.5%)</b>                      | 13 (61.9%)               | 12 (54.5%)                  | 14 (66.7%)                   | 23 (100.0%)                  | 1.14 (0.44)                           | 13 (61.9%)                           | 7 (38.9%)                      | 14 (66.7%)                   | 16 (84.2%)                         | 1.17 (0.50)         |
| Very remote               | <b>22 (4.3%)</b>                      | 13 (61.9%)               | 10 (45.5%)                  | 12 (54.5%)                   | 21 (100.0%)                  | 1.08 (0.43)                           | 15 (68.2%)                           | 5 (27.8%)                      | 16 (84.2%)                   | 18 (85.7%)                         | 1.18 (0.48)         |

n(%) = number and percentage of participants in each area-level category responding yes to item, M (SD) = Mean and SD reported for factor scores,

\*=  $p < .05$  (applying family-wise error rate adjustment)

Running head: REGIONAL AND REMOTE CANCER PATIENTS EXPERIENCES

### Communication and patient involvement

Participants reported that their views were taken into account when their team of doctors and nurses were discussing their treatment 59.5% of the time (Table 3). Those with middle school education or lower were twice as likely to report having their views taken into account in treatment decisions (OR = 2.22, CI = 1.49 – 3.33) compared to those with senior high school or trade/tertiary level education. Older patients were slightly more likely to report that their views were taken into account by doctors and nurses when deciding on treatment ( $r = .11, p = .02$ ). Similarly, 60.8% of participants felt they were involved in decisions about their care and treatment as much as they would have liked, however, this did not vary according to individual characteristics.

Most participants reported understanding the explanation of “what was wrong with them” upon diagnosis (97.3%) and this did not differ significantly according to individual characteristics. More than half of the patients (66.8%) reported that the possible side-effects of their treatment were explained to them in a way they could understand. Those with middle school education or lower were 1.5 times more likely to report having side effects explained to them in a way that they understood compared to those with trade/tertiary level education (OR = 1.50, CI = 1.14 – 1.96) and those with senior level education were less likely to report this compared to those with trade/tertiary level education (OR = 0.65, CI = 0.46 – 0.90).

Group differences were evident in participants’ scores on the communication and patient involvement factor with patients possessing middle school level education (M = 1.23, SD = 0.42) reporting higher scores than those with trade/tertiary level education (M = 1.08, SD = 0.42),  $t(509) = 42.75, p < .001, d = 0.36$ , or those with senior school level education (M = 1.05, SD = 0.42),  $t(509) = 21.88, p < .001, d = 0.43$ . When compared with all other cancer types, patients with breast (M = 1.23, SD = 0.43),  $t(512) = 28.75, p < .001, d = 0.28$ , and prostate (M = 1.20, SD = 0.41),  $t(512) = 22.40, p < .001, d = 0.17$  cancer reported higher

## Regional and remote cancer patients' experiences

scores on the communication and patient involvement factor, while those with skin (M = 1.05, SD = 0.46),  $t(512) = 19.75, p < .001, d = 0.22$  and head and neck (M = 1.14, SD = 0.42),  $t(512) = 22.83, p < .001, d = 0.01$  cancers reported lower scores than those with other cancer types.

### Provision of information and services

Sixty-four percent of participants were given written information about the type of cancer they had. Females were 1.69 (CI = 1.16 – 2.46) times as likely to report receiving this information when compared to males. Patients with breast cancer were 2.41 (CI = 1.39 – 4.42) times more likely, and those with skin cancer were 0.49 (CI = 0.28 – 1.18) times as likely to receive written information about the type of cancer they had compared to those with other cancers. The majority of patients reported being given written information about the side effects of treatment (84.8%) with those with skin cancer less likely to receive this information compared to those with other cancer types 0.33 (CI= 0.17 – 0.65).

Only 37.5% of participants reported receiving a written assessment and care plan. Those with middle school education or lower were almost two times more likely to report receiving an assessment and care plan (OR = 1.90, CI = 1.23 – 2.91) compared to those with senior high school or trade/tertiary level education. Over two thirds of patients reported being given the name of a clinical nurse specialist to support them through treatment (68.9%), however, patients with breast cancer were 8.07 (CI = 3.55 – 18.37) times more likely, and patients with prostate cancer patients were 2.77 (CI = 1.36– 5.68) times more likely, to be offered this service compared to participants with other types of cancer.

Those with middle school level education or lower (M = 1.27, SD = 0.48) reported higher scores on the provision of service and information factor than those with trade/tertiary level education (M = 1.12, SD = 0.47),  $t(509) = 39.71, p < .001, d = 0.32$  or those with senior school level education (M = 1.07, SD = 0.46),  $t(509) = 20.28, p < .001, d = 0.42$ . When compared with all other cancer types, patients with breast (M = 1.36, SD = 0.39),  $t(99) = 19$



## Regional and remote cancer patients' experiences

34.47,  $p < .001$ ,  $d = 0.54$  or prostate ( $M = 1.25$ ,  $SD = 0.45$ ),  $t(63) = 22.42$ ,  $p < .001$ ,  $d = 0.19$  cancer reported higher scores on the provision of information and services factor, while those with skin ( $M = 0.97$ ,  $SD = 0.54$ ),  $t(64) = 14.52$ ,  $p < .001$ ,  $d = 0.46$  or head and neck ( $M = 1.16$ ,  $SD = 0.48$ ),  $t(73) = 20.73$ ,  $p < .001$ ,  $d = 0.03$  cancers reported lower scores than those with other cancer types. Area-level characteristics (i.e., remoteness or SEIFA) were not significantly associated with single items or factor scores reflecting provision of information and services (see [Table 3](#)).

### Associations between NCCI factor scores and health and psychosocial variables

Both communication and patient involvement and provision of information and services factors shared significant positive associations with QoL, satisfaction with health care and constructed meaning (see [Figure 2](#)). They were also both associated with lower supportive care needs in most cases, the strongest associations being with health system and information needs. The communication and patient involvement factor was moderately associated with greater psychosocial QoL ( $r = .30$ ,  $p < .001$ ) and satisfaction with healthcare ( $r = .29$ ,  $p < .001$ ) as well as lower levels of unmet 'health systems and information' ( $r = -.39$ ,  $p < .001$ ). and 'patient care' ( $r = .35$ ,  $p < .001$ ) needs and lower cancer threat appraisal ( $r = .31$ ,  $p < .001$ ). The provision of information and services factor had a weaker pattern of associations though still moderately predicted lower levels of unmet 'health systems and information' ( $r = -.32$ ,  $p < .001$ ) and 'patient care' ( $r = -.23$ ,  $p < .001$ ) needs as well as greater satisfaction with healthcare ( $r = .23$ ,  $p < .001$ ). The communication and patient involvement factor shared significantly stronger associations with higher psychosocial QoL ( $z = 2.03$ ,  $p = .042$ ), and lower levels of unmet need in terms of psychosocial support ( $z = 2.05$ ,  $p = .040$ ) and patient care ( $z = 2.00$ ,  $p = .046$ ). Communication and patient involvement was associated with lower stress and anxiety, while provision of information and services was not (see [Figure 2](#)).



## Regional and remote cancer patients' experiences

Area-level characteristics (i.e., remoteness or SEIFA) were not significantly associated with single items or scores on either NCCI factor (see [Table 3](#)).

## DISCUSSION

The goal of delivering equitable patient-centered cancer care is a corner stone of cancer control plans and care guidelines. (6,7,9,12) The present study suggests that the NCCI patient experience indicators have validity and strong potential as a quality assurance tool to support this. Importantly, this brief tool discriminated between different aspects of patient experience for those dislocated from their home during treatment and identified characteristics associated with a poorer experience. While it was almost universal for patients to recall understanding the explanation of their treatment, and most people reported that treatment side effects were explained and supported with written information, only a minority received a written assessment and care plan. Further, patient experience varied by clinical and sociodemographic characteristics suggesting that there is work to be done on better understanding what influences care, and how we might intervene.

From a construct perspective, the patient experience as measured by the NCCI indicators presented along two key dimensions: 1) communication and patient involvement and 2) provision of information and services. For both dimensions, the strong association with health system and information needs provides evidence of convergent validity. The closer connection between communication and patient involvement and QoL and psychosocial outcomes intuitively makes sense given the important role of the interpersonal relationships between the health care teams and patients, as well as the self-efficacy and personal agency that evolves from patient's involvement in their health care. (32) These associations may be bi-directional. Patients with lower psychological distress have a higher capacity to absorb information, take part in decision making, benefit from communications with healthcare professionals (33,34) and are subsequently more likely to report satisfaction

## Regional and remote cancer patients' experiences

with this element of their care. (35) Those individuals who are psychologically vulnerable or have poorer QoL likely need stepped up care to achieve optimal outcomes. (36)

Despite suggestions that remote living is associated with poorer experiences for cancer survivors, area level factors were not associated with NCCI outcomes. Rather, differences in patient experiences according to cancer were apparent. Notably, breast and prostate cancer patients were more likely to receive clinical nurse support compared to skin and head and neck cancer patients. This may reflect the different resources and services available for specific cancers, for example, the introduction of the specialist nurse role for breast cancer patients, (37) and more recently prostate cancer patients. (38) While a specialist nurse appears to greatly enhance patient experience, (39) providing this for all cancer types is likely a resourcing challenge especially for regional and remote health services. Models that incorporate telehealth and that span broadly across multiple cancer types or chronic disease may be needed. (40) Higher education appeared to be associated with less communication and patient involvement and information and services. The reasons for this are unclear however it may be that health professionals assume these patients require less support or alternatively that people with more education have greater expectations in this domain of care.

As the aim of the present study was to provide specific insight into the experiences of regional and remote cancer patients, caution should be applied in generalising these findings to urbanised populations. Since the survey is cross-sectional we cannot assume causality; and the data is self-reported and was not able to be verified by observational data or care records. However, this large, representative sample was recruited from a statewide jurisdiction and so likely represents the actual experience of patients from regional and remote Australia. Although the aim of the current research was to assess patient experiences using a metric published by a National governing body, it is important to note that several

## Regional and remote cancer patients' experiences

valid measures of patient experience covering different aspects of patients' care and support needs exist and future research will benefit from their inclusion.

The present results outline the patient experience for a rural and regional population who are at risk of fragmented or poorly coordinated care. Patients who report better communication with their health care team and more involvement have better QoL, less stress and anxiety, and lower threat. Fulfilling the NCCI indicators connects to lower unmet need in health services and information. Cancer care services that ensure these indicators are met are better placed to provide an optimal cancer experience and improved patient-reported outcomes.

The NCCI presents as a useful and valid tool for assessing the patient experience. The aspect of care that appears most crucial is communication and involvement with the health care team. Strategies to optimize this for regional and remote patients need to be a cancer control priority.

Regional and remote cancer patients' experiences

**Figure Captions:**

Figure 1. Recruitment flowchart

Figure 2. Visual comparison of the correlation co-efficients between each health/psychosocial variable and each factor.

For peer review only

## Regional and remote cancer patients' experiences

## References

1. Bray F, Ferlay J, Soerjomataram I, Siegel RL, Torre LA, Jemal A. Global cancer statistics 2018: GLOBOCAN estimates of incidence and mortality worldwide for 36 cancers in 185 countries. *CA Cancer J Clin*. 2018;68(6):394–424.
2. Dasgupta P, Baade PD, Aitken JF, Ralph N, Chambers SK, Dunn J. Geographical variations in prostate cancer outcomes: a systematic review of international evidence. *Front Oncol*. 2019;9:238.
3. Alfano CM, Jefford M, Maher J, Birken SA, Mayer DK. Building personalized cancer follow-up care pathways in the United States: lessons learned from implementation in England, Northern Ireland, and Australia. *Am Soc Clin Oncol Educ Book*. 2019;39:625–639.
4. Ellison EC, Pawlik TM, Way DP, Satiani B, Williams TE. The impact of the aging population and incidence of cancer on future projections of general surgical workforce needs. *Surgery*. 2018;163(3):553–559.
5. Jakka S, Rossbach M. An economic perspective on personalized medicine. *HUGO J* [Internet]. 2013 Dec [cited 2020 Apr 20];7(1). Available from: <https://www.ncbi.nlm.nih.gov/pmc/articles/PMC4685168/>
6. National Health Service, UK. Innovation to implementation: Stratified pathways of care for people living with or beyond cancer A 'how to guide' [Internet]. 2016. Available from: <https://www.england.nhs.uk/wp-content/uploads/2016/04/stratified-pathways-update.pdf>
7. Australian Government, Department of Health. Optimal Cancer Care Pathways (OCPs) [Internet]. 2018. Available from: <https://www1.health.gov.au/internet/main/publishing.nsf/Content/occp>
8. Ganz PA, Balogh E. Delivering High-Quality Cancer Care: Charting a new course for a system in crisis. *Wash DC Inst Med Natl Acad*. 2013;
9. Bao H, Yang F, Su S, Wang X, Zhang M, Xiao Y, et al. Evaluating the effect of clinical care pathways on quality of cancer care: analysis of breast, colon and rectal cancer pathways. *J Cancer Res Clin Oncol*. 2016 May 1;142(5):1079–89.
10. Department of Health. National Cancer Patient Experience Survey 2018. National Results Summary [Internet]. National Health Service, United Kingdom; 2018. Available from: [https://assets.publishing.service.gov.uk/government/uploads/system/uploads/attachment\\_data/file/216682/dh\\_122520.pdf](https://assets.publishing.service.gov.uk/government/uploads/system/uploads/attachment_data/file/216682/dh_122520.pdf)
11. State of Victoria, Department of Health and Human Services. Understanding care experiences of people with cancer. Findings from pilot study 2 [Internet]. Victorian Government; 2016.
12. Cancer Australia, Australian Government. National Cancer Control Indicators. [Internet]. 2019. Available from: <https://ncci.canceraustralia.gov.au/>

## Regional and remote cancer patients' experiences

13. Wilkes LM, White K, Mohan S, Beale B. Accessing metropolitan cancer care services: practical needs of rural families. *J Psychosoc Oncol*. 2006;24(2):85–101.
14. Ireland MJ, March S, Crawford-Williams F, Cassimatis M, Aitken JF, Hyde MK, et al. A systematic review of geographical differences in management and outcomes for colorectal cancer in Australia. *BMC Cancer*. 2017;17(1):95.
15. Cancer Council Queensland, Queensland University of Technology, Cooperative Research Centre for Spatial Information. Australian Cancer Atlas Version 09-2018. Accessed [give date] [Internet]. 2018 [cited 2018 Dec 14]. Available from: <https://atlas.cancer.org.au>
16. Weaver KE, Geiger AM, Lu L, Case LD. Rural-urban disparities in health status among US cancer survivors. *Cancer*. 2013;119(5):1050–1057.
17. Salehi A, Frommolt V, Coyne E. Factors affecting provision of care services for patients with cancer living in the rural area: an integrative review. *Aust J Cancer Nurs*. 2019;20(1).
18. Butow PN, Phillips F, Schweder J, White K, Underhill C, Goldstein D. Psychosocial well-being and supportive care needs of cancer patients living in urban and rural/regional areas: a systematic review. *Support Care Cancer*. 2012;20(1):1–22.
19. Burris JL, Andrykowski M. Disparities in mental health between rural and nonrural cancer survivors: a preliminary study. *Psycho-Oncol J Psychol Soc Behav Dimens Cancer*. 2010;19(6):637–645.
20. Beesley V, Eakin E, Steginga S, Aitken J, Dunn J, Battistutta D. Unmet needs of gynaecological cancer survivors: implications for developing community support services. *Psycho-Oncol J Psychol Soc Behav Dimens Cancer*. 2008;17(4):392–400.
21. Pateman KA, Cockburn NL, Batstone MD, Ford PJ. Quality of life of head and neck cancer patients in urban and regional areas: An Australian perspective. *Aust J Rural Health*. 2018;26(3):157–164.
22. Australian Bureau of Statistics. Australian Statistical Geography Standard (ASGS): Correspondences. Cat. No. 1270.0.55.006. [Internet]. Canberra: ABS; 2011. Available from: <https://www.abs.gov.au/AUSSTATS/abs@.nsf/DetailsPage/1270.0.55.006July%202011?OpenDocument> [Accessed 7 November 2019].
23. Australian Bureau of Statistics. ABS.Stat SEIFA by Local Government Area (LGA). [Internet]. Canberra: ABS; 2011. Available from: [http://stat.data.abs.gov.au/Index.aspx?DataSetCode=ABS\\_SEIFA\\_LGA](http://stat.data.abs.gov.au/Index.aspx?DataSetCode=ABS_SEIFA_LGA). [Accessed 7 November 2019].
24. Muthén Linda K, Muthén Bengt O. Mplus user's guide. Los Angel Muthen Muthen. 2007;
25. Antony MM, Bieling PJ, Cox BJ, Enns MW, Swinson RP. Psychometric properties of the 42-item and 21-item versions of the Depression Anxiety Stress Scales in clinical groups and a community sample. *Psychol Assess*. 1998;10(2):176.

## Regional and remote cancer patients' experiences

26. Gomez F. A guide to the depression, anxiety and stress scale (DASS 21). Cent East Syd Prim Health Netw. 2016;
27. Fife BL. The measurement of meaning in illness. *Soc Sci Med*. 1995;40(8):1021–1028.
28. Richardson J, Sinha K, Iezzi A, Khan M. Modelling the utility of health states with the Assessment of Quality of Life (AQoL) 8D instrument: overview and utility scoring algorithm. *Res Pap 63 Cent Health Econ*. 2011;
29. Boyes A, Girgis A, Lecathelinais C. Brief assessment of adult cancer patients' perceived needs: development and validation of the 34-item Supportive Care Needs Survey (SCNS-SF34). *J Eval Clin Pract*. 2009;15(4):602–606.
30. Corp. I. IBM SPSS Statistics for Windows, Version 26. Armonk, NY: IBM Corp.; 2019.
31. Queensland Cancer Registry. unpublished data [Internet]. Available from: <https://cancerallianceqld.health.qld.gov.au/data-access/>
32. Prip A, Møller KA, Nielsen DL, Jarden M, Olsen M-H, Danielsen AK. The Patient–Healthcare Professional Relationship and Communication in the Oncology Outpatient Setting: A Systematic Review. *Cancer Nurs*. 2018;41(5):E11.
33. Jansen J, van Weert JC, de Groot J, van Dulmen S, Heeren TJ, Bensing JM. Emotional and informational patient cues: the impact of nurses' responses on recall. *Patient Educ Couns*. 2010;79(2):218–224.
34. van Osch M, Sep M, van Vliet LM, van Dulmen S, Bensing JM. Reducing patients' anxiety and uncertainty, and improving recall in bad news consultations. *Health Psychol*. 2014;33(11):1382.
35. Kane HL, Halpern MT, Squiers LB, Treiman KA, McCormack LA. Implementing and evaluating shared decision making in oncology practice. *CA Cancer J Clin*. 2014;64(6):377–388.
36. Schofield P, Chambers S. Effective, clinically feasible and sustainable: Key design features of psycho-educational and supportive care interventions to promote individualised self-management in cancer care. *Acta Oncol*. 2015;54(5):805–812.
37. Amir Z, Scully J, Borrill C. The professional role of breast cancer nurses in multi-disciplinary breast cancer care teams. *Eur J Oncol Nurs*. 2004;8(4):306–314.
38. Ralph N, Green A, Sara S, McDonald S, Norris P, Terry V, et al. Prostate cancer survivorship priorities for men and their partners: Delphi consensus from a nurse specialist cohort. *J Clin Nurs*. 2020;29(1–2):265–273.
39. Dunn J, Ralph N, Green A, Frydenberg M, Chambers SK. Contemporary consumer perspectives on prostate cancer survivorship: Fifty voices. *Psychooncology*. 2020;29(3):557–563.
40. Lovell NH, Redmond SJ, Basilakis J, Shany T, Celler BG. Telehealth technologies for managing chronic disease-experiences from Australia and the UK. In: 2010 Annual International Conference of the IEEE Engineering in Medicine and Biology. IEEE; 2010. p. 5267–5269.

27

Regional and remote cancer patients' experiences

1  
2  
3  
4  
5  
6  
7  
8  
9  
10  
11  
12  
13  
14  
15  
16  
17  
18  
19  
20  
21  
22  
23  
24  
25  
26  
27  
28  
29  
30  
31  
32  
33  
34  
35  
36  
37  
38  
39  
40  
41  
42  
43  
44  
45  
46  
47  
48  
49  
50  
51  
52  
53  
54  
55  
56  
57  
58  
59  
60

For peer review only



Running head: REGIONAL AND REMOTE CANCER PATIENTS EXPERIENCES

Figure 1. Recruitment flowchart

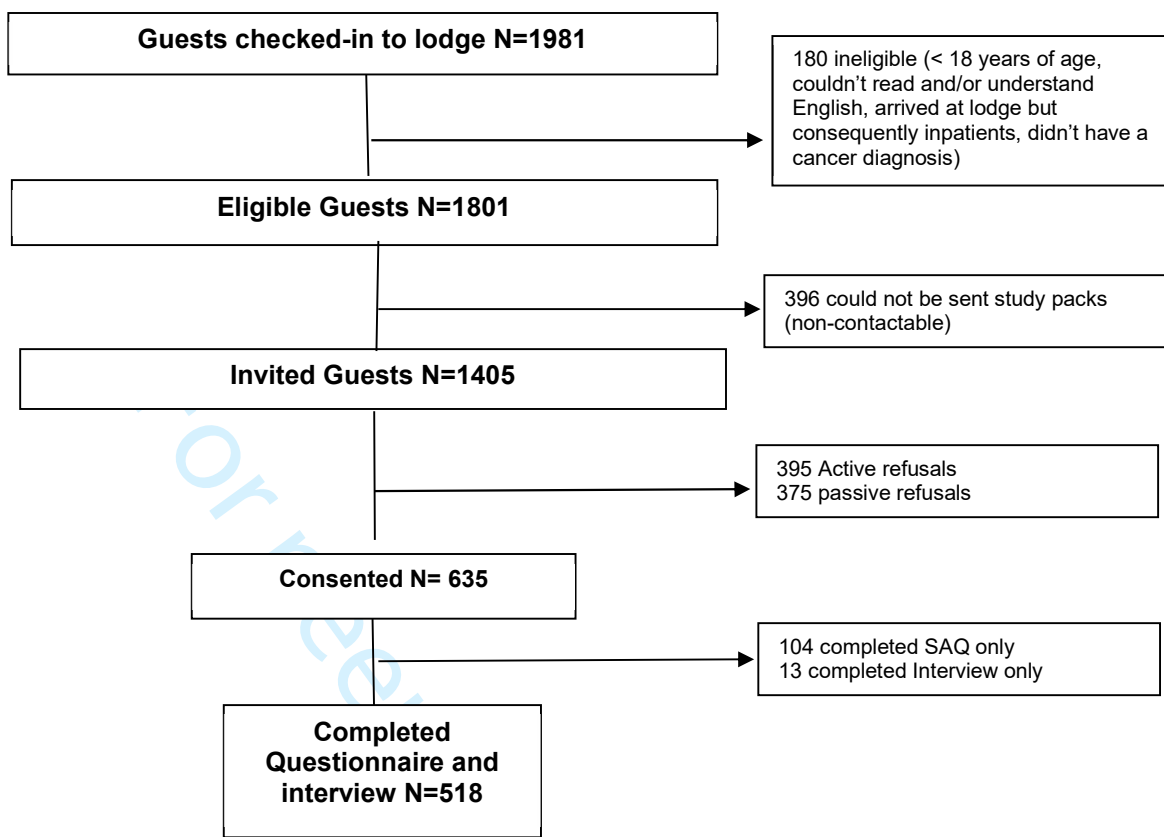

Regional and remote cancer patients' experiences

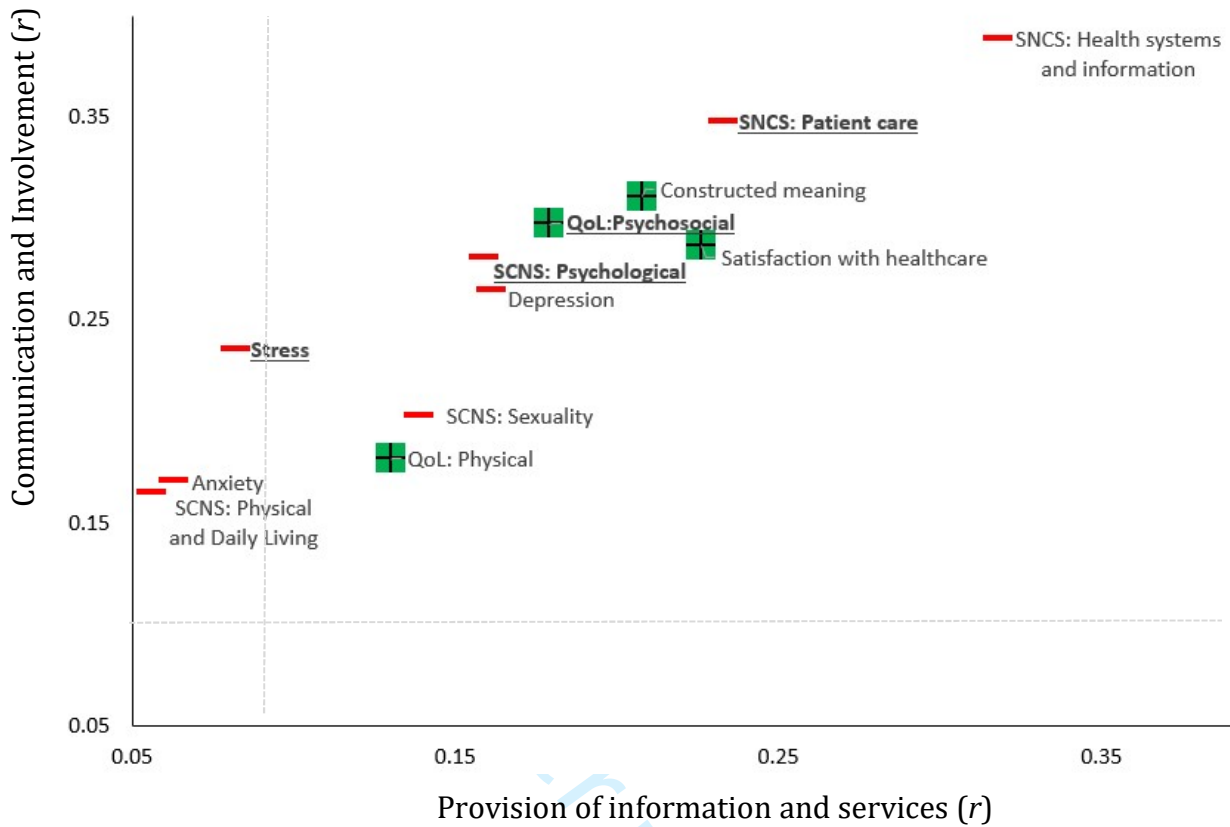

+ = Positive relationship with factor, - = Negative relationship with factor, **bold underlined** = significantly higher association with variable and communication and involvement factor,    = point at which beta weight is significant at <0.05

Figure 2. Visual comparison of the correlation co-efficients between each health/psychosocial variable and each factor.

**Applying National Cancer Control Indicators to Regional and Remote Cancer Patients' Experiences** Jeff Dunn, Belinda C Goodwin ([belindagoodwin@cancerqld.org.au](mailto:belindagoodwin@cancerqld.org.au)), Joanne F. Aitken, Sonja March, Fiona Crawford-Williams, Michael J. Ireland, Nicholas Ralph, Leah Zajdlewicz, Arlen Rowe, and Suzanne K. Chambers.  
University of Southern Queensland & Cancer Council Queensland

Supplementary Table 1. Frequencies and percentages<sup>^</sup> of responses to NCCI – Patient Experience Items and grouping of binary responses, n (%).

|                                                                                                         |                                           |                                                |                                                       |                                           |                                     |
|---------------------------------------------------------------------------------------------------------|-------------------------------------------|------------------------------------------------|-------------------------------------------------------|-------------------------------------------|-------------------------------------|
|                                                                                                         | <b>Yes, I completely understood it</b>    | <b>Yes, I understood some of it</b>            | <b>No</b>                                             | <b>I can't remember</b>                   | <b>Missing</b>                      |
| When you were told you had cancer, did you understand the explanation of what was wrong with you?       | 345 (66.7%)                               | 153 (29.4%)                                    | 14 (2.7%)                                             | 5 (1.0%)                                  | 1 (0.19%)                           |
|                                                                                                         | <b>Yes, and it was easy to understand</b> | <b>Yes, and it was difficult to understand</b> | <b>No</b>                                             | <b>I did not need written information</b> | <b>I don't know/ can't remember</b> |
| When you were told you had cancer, were you given written information about the type of cancer you had? | 262 (51.3%)                               | 54 (10.6%)                                     | 134 (26.2%)                                           | 44 (8.6%)                                 | 17 (3/3%)                           |
|                                                                                                         | <b>Yes</b>                                | <b>No</b>                                      | <b>I don't know/ can't remember</b>                   | <b>Missing</b>                            |                                     |
| Have you been offered a written assessment and care plan                                                | 159 (31.0%)                               | 265 (51.7%)                                    | 89 (17.3%)                                            | 5 (1.0%)                                  |                                     |
|                                                                                                         | <b>Yes</b>                                | <b>No</b>                                      | <b>I don't know/ can't remember</b>                   | <b>Missing</b>                            |                                     |
| Were you given the name of a Clinical Nurse Specialist who would support you through your treatment?    | 317 (61.8%)                               | 143 (27.9%)                                    | 53 (10.2%)                                            | 5 (1.0%)                                  |                                     |
|                                                                                                         | <b>Yes, definitely</b>                    | <b>Yes, to some extent</b>                     | <b>No, but I would have liked to be more involved</b> | <b>I don't know/can't remember</b>        | <b>Missing</b>                      |
| Were you involved as much as you wanted to be in decisions about your care and treatment?               | 305 (59.2%)                               | 161 (31.3%)                                    | 36 (6.9%)                                             | 13 (2.5%)                                 | 3 (0.6%)                            |

<sup>^</sup>valid percentage reported except for missing column, calculated based on non-missing data ----- = coded as yes, ----- = coded as no, no border = treated as missing

**Applying National Cancer Control Indicators to Regional and Remote Cancer Patients' Experiences** Jeff Dunn, Belinda C Goodwin ([belindagoodwin@cancerqld.org.au](mailto:belindagoodwin@cancerqld.org.au)), Joanne F. Aitken, Sonja March, Fiona Crawford-Williams, Michael J. Ireland, Nicholas Ralph, Leah Zajdlewicz, Arlen Rowe, and Suzanne K. Chambers.  
 University of Southern Queensland & Cancer Council Queensland

Supplementary Table 1. (Cont.)

|                                                                                                                                                     | Yes, definitely | Yes, to some extent | No         | I didn't know my treatment was being discussed ... | I don't know/ can't remember | Missing  |
|-----------------------------------------------------------------------------------------------------------------------------------------------------|-----------------|---------------------|------------|----------------------------------------------------|------------------------------|----------|
| Do you think your views were taken into account when the team of doctors and nurses caring for you were discussing which treatment you should have? | 294 (57.8%)     | 152 (29.2%)         | 31 (6.1%)  | 17 (2.9%)                                          | 15 (2.8%)                    | 9 (1.7%) |
| Were the possible side effects of treatment(s) explained in a way you could understand?                                                             | 338 (65.5%)     | 136 (26.4%)         | 30 (5.8%)  | 2 (0.4%)                                           | 10 (1.9%)                    | 2 (0.4%) |
| Before you started your treatment, were you given written information about the side effects of treatment(s)?                                       | 354 (69.4%)     | 54 (10.6%)          | 73 (14.3%) | 29 (5.7%)                                          |                              | 8 (1.5%) |

^valid percentage reported except for missing column, calculated based on non-missing data ----- = coded as yes, ----- = coded as no, no border = treated as missing

Note: To assess whether time since diagnosis was associated with non-response (i.e., no response or I don't know/ don't remember response), point bi-serial correlations were conducted between non-response and days since diagnosis. One weak association whereby those who were further past diagnosis were less likely to recall/provide a response to the NCCI item "Were you involved as much as you wanted to be in decisions about your care and treatment" ( $r = .130, p = .004$ )

**STROBE 2007 (v4) Statement—Checklist of items that should be included in reports of *cross-sectional studies***

| Section/Topic                | Item # | Recommendation                                                                                                                                                                       | Reported on page # |
|------------------------------|--------|--------------------------------------------------------------------------------------------------------------------------------------------------------------------------------------|--------------------|
| <b>Title and abstract</b>    | 1      | (a) Indicate the study's design with a commonly used term in the title or the abstract                                                                                               | 3                  |
|                              |        | (b) Provide in the abstract an informative and balanced summary of what was done and what was found                                                                                  | 3                  |
| <b>Introduction</b>          |        |                                                                                                                                                                                      |                    |
| Background/rationale         | 2      | Explain the scientific background and rationale for the investigation being reported                                                                                                 | 5,6                |
| Objectives                   | 3      | State specific objectives, including any prespecified hypotheses                                                                                                                     | 6                  |
| <b>Methods</b>               |        |                                                                                                                                                                                      |                    |
| Study design                 | 4      | Present key elements of study design early in the paper                                                                                                                              | 7                  |
| Setting                      | 5      | Describe the setting, locations, and relevant dates, including periods of recruitment, exposure, follow-up, and data collection                                                      | 7                  |
| Participants                 | 6      | (a) Give the eligibility criteria, and the sources and methods of selection of participants                                                                                          | 7                  |
| Variables                    | 7      | Clearly define all outcomes, exposures, predictors, potential confounders, and effect modifiers. Give diagnostic criteria, if applicable                                             | 7-13               |
| Data sources/<br>measurement | 8*     | For each variable of interest, give sources of data and details of methods of assessment (measurement). Describe comparability of assessment methods if there is more than one group | 7-13               |
| Bias                         | 9      | Describe any efforts to address potential sources of bias                                                                                                                            | 13 & 23            |
| Study size                   | 10     | Explain how the study size was arrived at                                                                                                                                            | 7                  |
| Quantitative variables       | 11     | Explain how quantitative variables were handled in the analyses. If applicable, describe which groupings were chosen and why                                                         | 13                 |
| Statistical methods          | 12     | (a) Describe all statistical methods, including those used to control for confounding                                                                                                | 13                 |
|                              |        | (b) Describe any methods used to examine subgroups and interactions                                                                                                                  | 13                 |
|                              |        | (c) Explain how missing data were addressed                                                                                                                                          | 14                 |
|                              |        | (d) If applicable, describe analytical methods taking account of sampling strategy                                                                                                   | -                  |
|                              |        | (e) Describe any sensitivity analyses                                                                                                                                                | -                  |
| <b>Results</b>               |        |                                                                                                                                                                                      |                    |

|                          |     |                                                                                                                                                                                                              |                  |
|--------------------------|-----|--------------------------------------------------------------------------------------------------------------------------------------------------------------------------------------------------------------|------------------|
| Participants             | 13* | (a) Report numbers of individuals at each stage of study—eg numbers potentially eligible, examined for eligibility, confirmed eligible, included in the study, completing follow-up, and analysed            | 7 (figure)       |
|                          |     | (b) Give reasons for non-participation at each stage                                                                                                                                                         | 7 (figure)       |
|                          |     | (c) Consider use of a flow diagram                                                                                                                                                                           | 7 (figure)       |
| Descriptive data         | 14* | (a) Give characteristics of study participants (eg demographic, clinical, social) and information on exposures and potential confounders                                                                     | 14               |
|                          |     | (b) Indicate number of participants with missing data for each variable of interest                                                                                                                          | 15 – 16 (tables) |
| Outcome data             | 15* | Report numbers of outcome events or summary measures                                                                                                                                                         | 15 – 16 (tables) |
| Main results             | 16  | (a) Give unadjusted estimates and, if applicable, confounder-adjusted estimates and their precision (eg, 95% confidence interval). Make clear which confounders were adjusted for and why they were included | -                |
|                          |     | (b) Report category boundaries when continuous variables were categorized                                                                                                                                    | 15-16            |
|                          |     | (c) If relevant, consider translating estimates of relative risk into absolute risk for a meaningful time period                                                                                             | -                |
| Other analyses           | 17  | Report other analyses done—eg analyses of subgroups and interactions, and sensitivity analyses                                                                                                               | 18-20            |
| <b>Discussion</b>        |     |                                                                                                                                                                                                              |                  |
| Key results              | 18  | Summarise key results with reference to study objectives                                                                                                                                                     | 21               |
| Limitations              | 19  | Discuss limitations of the study, taking into account sources of potential bias or imprecision. Discuss both direction and magnitude of any potential bias                                                   | 22               |
| Interpretation           | 20  | Give a cautious overall interpretation of results considering objectives, limitations, multiplicity of analyses, results from similar studies, and other relevant evidence                                   | 21,22            |
| Generalisability         | 21  | Discuss the generalisability (external validity) of the study results                                                                                                                                        | 22               |
| <b>Other information</b> |     |                                                                                                                                                                                                              |                  |
| Funding                  | 22  | Give the source of funding and the role of the funders for the present study and, if applicable, for the original study on which the present article is based                                                | 2                |

\*Give information separately for cases and controls in case-control studies and, if applicable, for exposed and unexposed groups in cohort and cross-sectional studies.

**Note:** An Explanation and Elaboration article discusses each checklist item and gives methodological background and published examples of transparent reporting. The STROBE checklist is best used in conjunction with this article (freely available on the Web sites of PLoS Medicine at <http://www.plosmedicine.org/>, Annals of Internal Medicine at <http://www.annals.org/>, and Epidemiology at <http://www.epidem.com/>). Information on the STROBE Initiative is available at [www.strobe-statement.org](http://www.strobe-statement.org).

# BMJ Open

## Are National Cancer Control Indicators for Patient Experiences being met in Regional and Remote Australia? A cross-sectional study of Cancer Survivors who Travelled for Treatment.

|                                 |                                                                                                                                                                                                                                                                                                                                                                                                                                                                                                                                                                                                                                                                                                                                                                                            |
|---------------------------------|--------------------------------------------------------------------------------------------------------------------------------------------------------------------------------------------------------------------------------------------------------------------------------------------------------------------------------------------------------------------------------------------------------------------------------------------------------------------------------------------------------------------------------------------------------------------------------------------------------------------------------------------------------------------------------------------------------------------------------------------------------------------------------------------|
| Journal:                        | <i>BMJ Open</i>                                                                                                                                                                                                                                                                                                                                                                                                                                                                                                                                                                                                                                                                                                                                                                            |
| Manuscript ID                   | bmjopen-2020-042507.R2                                                                                                                                                                                                                                                                                                                                                                                                                                                                                                                                                                                                                                                                                                                                                                     |
| Article Type:                   | Original research                                                                                                                                                                                                                                                                                                                                                                                                                                                                                                                                                                                                                                                                                                                                                                          |
| Date Submitted by the Author:   | 18-Jan-2021                                                                                                                                                                                                                                                                                                                                                                                                                                                                                                                                                                                                                                                                                                                                                                                |
| Complete List of Authors:       | Dunn, Jeff; Prostate Cancer Foundation of Australia; University of Southern Queensland - Springfield Campus, Goodwin, Belinda; Cancer Council Queensland, ; University of Southern Queensland - Springfield Campus, Aitken, Joanne; Cancer Council Queensland, Cancer Research Centre March, Sonja; University of Southern Queensland, School of Psychology and Counselling; University of Southern Queensland Crawford-Williams, Fiona; University of Southern Queensland Ireland, Michael; University of Southern Queensland, Psychology and Counselling<br>Ralph, Nicholas; University of Southern Queensland<br>Zajdlewicz, Leah; Cancer Council Queensland<br>Rowe, Arlen; University of Southern Queensland<br>Chambers, Suzanne; University of Technology Sydney Faculty of Health, |
| <b>Primary Subject Heading</b>: | Public health                                                                                                                                                                                                                                                                                                                                                                                                                                                                                                                                                                                                                                                                                                                                                                              |
| Secondary Subject Heading:      | Oncology, Health services research                                                                                                                                                                                                                                                                                                                                                                                                                                                                                                                                                                                                                                                                                                                                                         |
| Keywords:                       | HEALTH SERVICES ADMINISTRATION & MANAGEMENT, Quality in health care < HEALTH SERVICES ADMINISTRATION & MANAGEMENT, Adult oncology < ONCOLOGY, Organisation of health services < HEALTH SERVICES ADMINISTRATION & MANAGEMENT                                                                                                                                                                                                                                                                                                                                                                                                                                                                                                                                                                |
|                                 |                                                                                                                                                                                                                                                                                                                                                                                                                                                                                                                                                                                                                                                                                                                                                                                            |

SCHOLARONE™  
Manuscripts



I, the Submitting Author has the right to grant and does grant on behalf of all authors of the Work (as defined in the below author licence), an exclusive licence and/or a non-exclusive licence for contributions from authors who are: i) UK Crown employees; ii) where BMJ has agreed a CC-BY licence shall apply, and/or iii) in accordance with the terms applicable for US Federal Government officers or employees acting as part of their official duties; on a worldwide, perpetual, irrevocable, royalty-free basis to BMJ Publishing Group Ltd ("BMJ") its licensees and where the relevant Journal is co-owned by BMJ to the co-owners of the Journal, to publish the Work in this journal and any other BMJ products and to exploit all rights, as set out in our [licence](#).

The Submitting Author accepts and understands that any supply made under these terms is made by BMJ to the Submitting Author unless you are acting as an employee on behalf of your employer or a postgraduate student of an affiliated institution which is paying any applicable article publishing charge ("APC") for Open Access articles. Where the Submitting Author wishes to make the Work available on an Open Access basis (and intends to pay the relevant APC), the terms of reuse of such Open Access shall be governed by a Creative Commons licence – details of these licences and which [Creative Commons](#) licence will apply to this Work are set out in our licence referred to above.

Other than as permitted in any relevant BMJ Author's Self Archiving Policies, I confirm this Work has not been accepted for publication elsewhere, is not being considered for publication elsewhere and does not duplicate material already published. I confirm all authors consent to publication of this Work and authorise the granting of this licence.



1  
2  
3  
4  
5 **Are National Cancer Control Indicators for Patient Experiences being met in Regional**  
6  
7 **and Remote Australia? A cross-sectional study of Cancer Survivors who Travelled for**  
8  
9 **Treatment.**  
10

11 Jeff Dunn<sup>a-e</sup>, Belinda C. Goodwin<sup>\*,a,b</sup>, Joanne F. Aitken<sup>a-c,f</sup>, Sonja March<sup>b,g</sup>, Fiona  
12 Crawford-Williams<sup>b</sup>, Michael J. Ireland<sup>b,g</sup>, Nicholas Ralph<sup>b,e</sup>, Leah Zajdlewicz<sup>a</sup>, Arlen  
13 Rowe<sup>b,g</sup>, and Suzanne K. Chambers<sup>b,c,e,h</sup>  
14

15  
16  
17  
18 \*Corresponding author:  
19 Cancer Council Queensland  
20 553 Gregory Terrace, Fortitude Valley, QLD, 4006  
21 [belindagoodwin@cancerqld.org.au](mailto:belindagoodwin@cancerqld.org.au)  
22  
23

24  
25 <sup>a</sup> Cancer Council Queensland, Brisbane, Australia  
26

27 <sup>b</sup> Centre for Health Research, University of Southern Queensland, Springfield, QLD, Australia  
28

29 <sup>c</sup> Menzies Health Institute Queensland, Griffith University, Mt Gravatt, QLD, Australia  
30

31 <sup>d</sup> Prostate Cancer Foundation of Australia, Sydney, NSW, Australia  
32

33 <sup>e</sup> Faculty of Health, University of Technology Sydney, NSW, Australia  
34

35 <sup>f</sup> School of Public Health, The University of Queensland, Springfield, QLD, Australia  
36

37 <sup>g</sup> School of Psychology and Counselling, University of Southern Queensland, Springfield, QLD,  
38 Australia  
39

40 <sup>h</sup> Exercise Medicine Research Institute, Edith Cowan University, Perth, Australia  
41

42  
43  
44  
45 **Acknowledgements**  
46

47 We would like to thank the research participants for taking part in the study and the Cancer  
48 Council Queensland volunteers and lodge staff who assisted with recruitment and data  
49 collection and entry. We also acknowledged the efforts of research team members Anna  
50 Stiller (Pamo Lozang) and Zina Ndugwa in assisting with project and data management.  
51  
52  
53  
54  
55

56 **Word count:** 4714  
57  
58  
59  
60

## ABSTRACT

**Objectives:** To examine the health services experience of cancer patients from regional and remote Australia using the Australian National Cancer Control Indicators (NCCI) guidelines as an assessment framework.

**Design:** Cross-sectional.

**Setting:** Queensland non-for-profit cancer accommodation lodges.

**Participants:** Participants were cancer patients who travelled for treatment from rural and remote Queensland to major urban centres ( $n=518$ ; age  $M = 64.6$ ,  $SD = 11.18$ ).

**Outcome measures:** Assessments included NCCI patient indicators, quality of life (QoL), psychological distress and unmet supportive care needs.

**Results:** The frequency at which NCCI indicators were met ranged from 37.5% for receiving an assessment and care plan to 97.3% for understanding explanations about diagnosis. Geographical considerations did not impact patient experience whereas middle school educated participants were more likely than those with senior level education or higher to receive an assessment and care plan ( $OR = 1.90$ ,  $CI = 1.23 - 2.91$ ) and to report having their views on treatment taken into account ( $OR = 2.22$ ,  $CI = 1.49 - 3.33$ ). Patients with breast or prostate cancer reported better communication and patient involvement and information and services provision ( $r = p < .001$ ) compared to those with skin and head and neck cancer. When compared to information and service provision, communication and patient involvement showed stronger positive associations with QoL ( $z = 2.03$ ,  $p = .042$ ), psychosocial ( $z = 2.05$ ,  $p = .040$ ), and patient care ( $z = 2.00$ ,  $p = .046$ ) outcomes.

**Conclusion:** The patient care experience varies across the NCCI indicators by sociodemographic and clinical factors that likely reflects health care system biases. Perceptions about communication and involvement appear most critical for optimal outcomes and should be a priority action area for cancer control.

1  
2  
3 **Keywords:** cancer; health service; information; communication; patient experiences; cancer  
4  
5 control.  
6  
7

### 8 **Strengths and limitations of this study**

9

- 10  
11 • This is the first study to quantitatively measure and test the National Cancer Control  
12 Indicators for patient experience.  
13
- 14  
15 • Findings provide important insight into the patient experience for a regional and  
16 remote population who are at risk of fragmented or poorly coordinated care.  
17
- 18  
19 • This large representative sample was recruited from a state-wide jurisdiction and so  
20 likely represents the actual experience of patients from regional and remote Australia.  
21
- 22  
23 • This study was cross-sectional therefore causality cannot be assumed.  
24
- 25  
26 • This study was aimed at gaining an insight into the experiences of regional and  
27 remote cancer patients, hence findings are not generalisable to urbanised populations.  
28  
29  
30  
31  
32  
33  
34  
35  
36  
37  
38  
39  
40  
41  
42  
43  
44  
45  
46  
47  
48  
49  
50  
51  
52  
53  
54  
55  
56  
57  
58  
59  
60

## INTRODUCTION

In Australia, as in other high income countries, cancer care delivery systems continue to be tested by increasing cancer prevalence due to an aging population and increasing survival. (1) Compounding this, widening socioeconomic and geographic inequities in cancer outcomes, (2) increasing healthcare costs, and workforce shortages (3,4) are all exacerbated by rapidly expanding, and complex, cancer diagnostic and treatment options. (5) In response, national societies and cancer control agencies globally have developed frameworks and guidelines for quality care cancer services that typically include characteristics such as being person-centered and tailored, evidence-based, coordinated, multi-disciplinary, quality assured and accountable. (6–9) While many of these guidelines focus on treatment, supportive and psychosocial care is also a central feature. For example, the first (of eight) recommendations from the Institute of Medicine 2013 report centers on patients and families receiving understandable information about all aspects of their cancer care. (8) The Australian Government's guides to best-practice cancer care, the Optimal Cancer Care Pathways, list access to supportive care, including survivorship, as a key theme across all steps of the care pathway. (7) Similarly, risk stratified pathways of cancer care in the UK emphasize assessing and supporting holistic patient needs, including those that are psychosocial and spiritual. While such frameworks are important, the question arises as to how cancer services might best evaluate the extent to which cancer care is meeting these recommendations, where gaps most exist, and crucially who is more vulnerable to underservicing.

A number of groups have developed indicators to reflect the extent to which optimal care is being delivered in terms of information, communication, education and care-coordination during diagnosis and treatment. (10,11) Thus far this been for quality assurance purposes within administering jurisdictions with findings not generally presented within the peer-reviewed literature. A set of items was recently developed by Cancer Australia for

1  
2 monitoring cancer patient experiences at the national level. The National Cancer Control  
3 Indicators (NCCI) patient experiences items are based on the National Health Service (NHS)  
4 England Cancer Patient Experience Survey, (12) and reflect the receipt and understanding of  
5 information about diagnosis and side effects of treatment as well as patient involvement in  
6 care and decision making, and the provision of care co-ordination tools and services. To date,  
7 results from the Australian NCCI indicators for patient experience have not been reported.  
8  
9  
10  
11  
12  
13  
14  
15

16 It is especially important to consider the quality of the patient experience for people  
17 who live in geographically remote locations. People with cancer living in remote locations  
18 incur the additional burden of having to travel long distances to attend specialist treatment  
19 facilities that are not available in sparsely populated and geographically remote areas of the  
20 country. (13) Cancer patients who live outside of major cities in Australia are known to  
21 experience poorer cancer outcomes (14,15) and report poor physical and mental health,  
22 (16,17) lower quality of life (QoL) (18,19) and unmet supportive care needs (18,20,21)  
23 compared to their urban counterparts.  
24  
25  
26  
27  
28  
29  
30  
31  
32  
33

34 Accordingly, the present study applied the NCCI guidelines as a framework to  
35 examine the health services experience of cancer patients and their families from regional and  
36 remote Australia experiencing geographic dislocation while obtaining cancer treatment. In  
37 doing so: 1) the construct validity of the NCCI guidelines was examined, 2) the extent to  
38 which these guidelines are currently being met was tested, 3) sociodemographic predictors of  
39 underservicing were explored, and 4) how psychosocial outcomes, unmet supportive care  
40 needs, satisfaction with health care were related to underservice were described.  
41  
42  
43  
44  
45  
46  
47  
48  
49  
50

## 51 **METHOD**

### 52 **Patient and Public Involvement Statement**

53 Patient and public involvement in the design and conduct of the study was sought from  
54 community members, research volunteers, and pilot study participants. Several community  
55 members including cancer survivors living in rural areas reviewed interview and  
56  
57  
58  
59  
60

1  
2 questionnaire items providing feedback on the clarity, formatting, and time to complete. The  
3  
4 research volunteers tested and evaluated materials and protocols while patients provided  
5  
6 written and verbal feedback to researchers regarding clarity, burden and relevance associated  
7  
8 with completing study materials. Minor refinements to the study materials to were made to  
9  
10 increase clarity and ease of delivery based on this feedback.  
11  
12

### 13 14 **Participants**

15  
16 Participants (n = 518) were cancer patients from regional and remote Queensland  
17  
18 staying at six Cancer Council Queensland (CCQ) lodges. CCQ is a not for profit organization  
19  
20 offering a range of services to those affected by cancer, one of those being the  
21  
22 accommodation lodges which aim to limit out of pocket expenses for patients. People who  
23  
24 are diagnosed with cancer, who are required to travel for their treatment, may receive a  
25  
26 referral to stay at one of the CCQ lodges from their healthcare team. Accommodation costs  
27  
28 are determined in conjunction with the patient's eligibility for the Queensland government's  
29  
30 Patient Travel Subsidy Scheme which is designed to assist in the cost of travel to the nearest  
31  
32 specialist medical service that is more than 50km from the patients nearest hospital. [Figure 1](#)  
33  
34 depicts participant recruitment flow. Eligibility criteria were: 18 years or older, able to read  
35  
36 and understand English, and staying at a CCQ lodge for cancer treatment. A total of 14015  
37  
38 of 1811 eligible CCQ lodge guests staying between September 11<sup>th</sup>, 2017 and 1<sup>st</sup> February,  
39  
40 2020 were provided with an invitation pack containing study details, consent forms and a  
41  
42 questionnaire. Three hundred and ninety-six eligible guests were not approached as contact  
43  
44 details were not provided or accurate.  
45  
46  
47  
48  
49

50  
51 Invitation packs were distributed upon arrival by lodge staff or, if this was not  
52  
53 possible (e.g., after hours check-in) were sent via mail to their home address. Patients were  
54  
55 contacted by phone one week after pack distribution, offered further details and invited to  
56  
57 participate. Assessments included a self-administered questionnaire and face-to-face (or  
58  
59  
60

1  
2 telephone) interview at baseline, followed by self-administered questionnaires at 3 months,  
3  
4  
5 12 months and annually thereafter.

6  
7 Of the eligible patients who received an invitation pack (n=1415), 645 (45.2%)  
8  
9 consented to participate, 395 (28.1%) actively refused, and 375 (26.7%) did not return a  
10  
11 consent form and could not be re-contacted. This report focusses on data collected at baseline  
12  
13 for a sample of 518 consenting participants who had a cancer diagnosis and completed both  
14  
15 the questionnaire and interview component of the study. Based on the available names and  
16  
17 addresses of non-respondents it could be estimated that responders and non-responders did  
18  
19 not differ significantly according to gender, remoteness, or socio-economic status.  
20  
21  
22

### 23 **Materials and measures**

24  
25 Questionnaires assessed demographic and patient characteristics, patient experiences  
26  
27 according to the NCCI, psychological distress and cognitive adjustment, satisfaction with  
28  
29 healthcare, QoL, and supportive care needs. Structured interviews assessed diagnostic and  
30  
31 treatment pathways. The study has approval from a recognized institutional Human Research  
32  
33 Ethics Committee (ref. H17REA152).

#### 34 **Demographics and patient characteristics**

35  
36  
37 Site of current cancer, gender, age, country of birth, highest level of education, and  
38  
39 household income were reported by each participant. Participant's residential street address at  
40  
41 baseline was geocoded and mapped to the 2011 SA2 boundaries using MapMarker®  
42  
43 Australia Version 15.16.0.21 and MapInfo Pro® Version 15.0 and classified by Remoteness  
44  
45 Area (22) and Socio-Economic Indexes for Areas (SEIFA). (23) Most recently diagnosed  
46  
47 primary cancer site was obtained via self-report and verified against the population-based  
48  
49 Queensland Cancer Register (QCR). Self-report data were relied upon where diagnosis could  
50  
51 not be verified by the QCR (n=39), for example if the patient had non-melanoma skin cancer  
52  
53 (which is not routinely notified to registries in Australia) or the patient's diagnosis had not  
54  
55 yet been notified to the QCR.  
56  
57  
58  
59  
60

## National Cancer Control Indicators - patient experience

Eight items derived from the National Health Service (NHS) England Cancer Patient Experience Survey (10) were adapted by Cancer Australia (12) as measures of National Cancer Control Indicators (NCCI) of cancer patient experiences. The items captured four key elements including 1) Patient information, communication and education during diagnosis; 2) Patient information, communication and education during; 3) Patient co-ordination and integration of care, continuity and transition; 4) Respect for patient preference. Response scales for each item vary including 3 category (e.g., yes, no, I don't know/remember) and 4 category (e.g., yes, yes to some extent, no, I don't know/remember) response options. Responses to each NCCI item were collapsed into a yes/no binary response with those responding with "I don't know" or "I don't remember" coded as missing. Full item wording, response categories and method for collapsing responses is available in as supplementary material (Supplementary Table 1).

As the NCCI items have not been validated for use in research an exploratory factor analysis was conducted for the current sample. One to four-factor solutions were extracted sequentially using Mplus v.8 software. (24). The decision on the number of factors to retain was driven by 1) overall and comparative model fit (determined by  $\chi^2$  and  $\Delta\chi^2$  and their corresponding p values), 2) balancing the trade-off between explanatory power and parsimony (determined by the Bayesian and the Akaike information criteria), and 3) an interpretable pattern of strong and non-cross-loading factor loadings.

For the one to three-factor solutions, overall model fit improved as a function of the number of factors extracted (see [Table 1](#)). However, the four-factor solution yielded a poorer fit than the three-factor solution according to both  $\chi^2$  and information criteria values and was not considered a candidate solution. The Bayesian information criterion shows that the three-factor solution exhibited poorer fit compared to the two-factor solution once model complexity was accounted for. Therefore, the two-factor solution represented the best trade-



1  
2  
3 off of explanatory power and parsimony. Finally, the two-factor solution also yielded a  
4  
5 simple structure in the pattern of item loadings. Each NCCI item loaded cleanly onto one of  
6  
7 each of the two factors (see [Table 2](#)); the first reflecting effective communication and patient  
8  
9 involvement the second reflecting the provision of information or services. A confirmatory  
10  
11 factor analytic approach was used to calculate factor score variables for the communication  
12  
13 and patient involvement and provision of information and services. Factor score variables  
14  
15 were transformed so that scores ranged from 0 (low) to 1.68 (high) for the communication  
16  
17 and patient involvement factor and 0 (low) to 1.84 (high) for the provision of information and  
18  
19 services factor.  
20  
21  
22  
23  
24  
25  
26  
27  
28  
29  
30  
31  
32  
33  
34  
35  
36  
37  
38  
39  
40  
41  
42  
43  
44  
45  
46  
47  
48  
49  
50  
51  
52  
53  
54  
55  
56  
57  
58  
59  
60

Table 1. Comparative fit statistics for one to four factor EFA solutions

|                                             | 1-factor        | 2-factor       | 3-factor       | 4-factor                      |
|---------------------------------------------|-----------------|----------------|----------------|-------------------------------|
| <b>AIC</b>                                  | 3848.70         | 3784.24        | 3775.34        | 3787.09                       |
| <b><math>\Delta</math>AIC</b>               | -               | 64.46          | 8.89           | -11.74                        |
| <b>BIC</b>                                  | 3916.70         | 3881.99        | 3898.59        | 3931.59                       |
| <b><math>\Delta</math>BIC</b>               | -               | 34.71          | -16.61         | -32.99                        |
| <b><math>\chi^2</math> (<i>p</i>)</b>       | 435.96 (< .001) | 306.55 (.001)  | 207.71 (.776)  | 225.45 (.368)                 |
| <b><math>\Delta\chi^2</math> (<i>p</i>)</b> | -               | 84.76 (< .001) | 40.37 (< .001) | ( $\Delta\chi^2$ is negative) |

For peer review only

Table 2. Exploratory factor analysis item loadings for two-factor solution

| Item                                                                                                                                                | Communication<br>and patient<br>involvement | Provision of<br>information and<br>services |
|-----------------------------------------------------------------------------------------------------------------------------------------------------|---------------------------------------------|---------------------------------------------|
| Do you think your views were taken into account when the team of doctors and nurses caring for you were discussing which treatment you should have? | 0.884*                                      | 0.005                                       |
| Were you involved as much as you wanted to be in decisions about your care and treatment?                                                           | 0.925*                                      | -0.063                                      |
| Were the possible side effects of treatment(s) explained in a way you could understand?                                                             | 0.507*                                      | 0.249*                                      |
| When you were told you had cancer, did you understand the explanation of what was wrong with you?                                                   | 0.633*                                      | 0.059                                       |
| Have you been offered a written assessment and care plan?                                                                                           | 0.185                                       | 0.579*                                      |
| When you were told you had cancer, were you given written information about the type of cancer you had?                                             | 0.075                                       | 0.579*                                      |
| Before you started your treatment, were you given written information about the side effects of treatment(s)?                                       | 0.002                                       | 0.719*                                      |
| Were you given the name of a Clinical Nurse Specialist who would support you through your treatment?                                                | -0.001                                      | 0.736*                                      |

Geomin Rotated Loadings (\* significant at 5% level)

## Running head: REGIONAL AND REMOTE CANCER PATIENTS EXPERIENCES

## Psychological distress and adjustment

Stress, anxiety and depression were measured using the 21-item Depression, Anxiety, and Stress Scale (DASS-21) (25). The scale asks respondents to indicate the degree to which each statement applied to them over the past week on a four-point Likert scale ranging from 0 = *not at all* to 3 = *almost always*. Scores for each subscale were summed and multiplied by 2, with higher scores indicating more distress. (26) Reliability for the anxiety ( $\alpha = .67$ ), stress ( $\alpha = .87$ ) and depression ( $\alpha = .90$ ) subscales were adequate to excellent.

Psychological adjustment to a cancer diagnosis was assessed using the Constructed Meaning Scale (CMS). The 8 item CMS measures a patients' cognitive response to being diagnosed with a life-threatening illness (27) on a 4-point Likert scale ranging from 1 = *strongly disagree* to 4 = *strongly agree*. Scores on the CMS reflect ability to construct a positive outlook regarding the effect that cancer has or will have on their future, their relationships, and their sense of self. Internal consistency in the current study was good ( $\alpha = .77$ ).

## Satisfaction with healthcare

Nine items were created by the researchers to assess patients' satisfaction with their health care in terms of the referral process, speed of diagnosis, speed of test results, the hospital where they were treated and the doctors and nurses, the emotional and physical support they receive in hospital and finally, and their medical care overall. Degree of satisfaction with each item was reported on a 5-point Likert scale ranging from 1 = *very dissatisfied* to 5 = *very satisfied*. Data and participant feedback from the pilot phase were examined to ensure items were clear and relevant and excellent internal consistency for the measure was evident ( $\alpha = .92$ ). Items were averaged to create a mean score.

## Quality of life

## Regional and remote cancer patients' experiences

Multidimensional QoL was measured using the 35-item Assessment of Quality of Life 8 Dimension instrument (AQoL-8D)(28). Participants responded on a 5-point Likert scale based on aspects of QoL during the past week. Responses are coded so that lower scores reflect poorer QoL on two psychometrically derived dimensions reflecting physical and psychological wellbeing. Internal reliability was evident for physical ( $\alpha = .64$ ) and psychological ( $\alpha = .92$ ) dimensions in the current study.

## Supportive care needs

Unmet need was measured using the Supportive Care Needs Survey Short Form-34 (SCNS-SF34). (29) The scale assesses patient need for support across five domains including physical and daily living, psychological, health systems and information, patient care and support, and sexuality with a single item regarding financial needs. Responses were coded: 0 (*no need/not applicable/need satisfied*), 1 (*low need*), 2 (*moderate need*), or 3 (*high need*) and means calculated resulting in six continuous variables reflecting the degree of need in each domain. Subscales showed excellent internal reliability (physical and daily living needs  $\alpha = .86$ ; psychological needs  $\alpha = .94$ ; health system and information needs  $\alpha = .95$ ; patient care and support needs  $\alpha = .88$ ; sexuality needs  $\alpha = .87$ ).

## Analysis

Data analyses were carried out in SPSS Version 26. (30) Frequencies and percentages were calculated for patient responses to each NCCI item. Demographics and area-level characteristic differences in the likelihood of reporting *yes* to a NCCI item were examined using chi-square statistics. A family-wise error rate adjustment was applied to constrain the chance of Type 1 errors to 5%. One-way analyses of variance (ANOVA) were used to identify group differences in NCCI factor scores and psychosocial outcomes Pearson's point biserial correlations assessed whether age was associated with NCCI items and factors. Where group differences were significant, post-hoc contrasts were applied to compare each

## Regional and remote cancer patients' experiences

category against others. Odds ratios (OR) and 95% confidence intervals (CI) were reported for contrasts involving NCCI items. Associations between factor scores and health/psychosocial variables were assessed using a series of correlations with coefficients graphed and compared using a Fisher's z-test. Missing data were excluded from analyses in a pairwise manner.

## RESULTS

### Sample characteristics

Participant ages ranged from 26 to 93 ( $M = 64.6$ ,  $SD = 11.18$ ) and 47.3% of participants identified as female and 52.7% as male. Most participants were born in Australia (80.5%), with the remainder born in the UK (9.9%), New Zealand (4.7%), and other countries (4.9%). Most participants reported low income with 64.8% reporting a household income under \$50,000 a year (i.e., the median yearly gross income in Australia). Most patients were not fully covered by private health insurance (81.5%) and the majority lived in inner (44.0%) or outer (42.5%) regional areas marked by high levels of socio-economic disadvantage (i.e., 66.5% were in the lowest socio-economic quintiles). The most common primary cancers were breast (19.3%), head and neck (14.3%), and skin (12.6%). – see [Table 3](#). Referenced to population statistics available through the Queensland Cancer Registry, the current sample was representative of the non-metropolitan Queensland cancer population in terms of gender, age, and country of birth. However, patients with skin cancer were under-represented (24.5% in population) and patients with head and neck cancer were over-represented (5.8% in population). At the time of data collection, time since diagnosis for each participant ranged between and 33.7 years and 1 day (Median = 211 days), with 64% of participants diagnosed within the previous 12 months.

Running head: REGIONAL AND REMOTE CANCER PATIENTS EXPERIENCES

Table 3. Participant characteristics and responses to NCCI items with chi-square and ANOVA group comparisons.

|                           |                          | Communication and patient involvement |                             |                              |                              |                     | Provision of information and services |                                |                              |                                    |                     |
|---------------------------|--------------------------|---------------------------------------|-----------------------------|------------------------------|------------------------------|---------------------|---------------------------------------|--------------------------------|------------------------------|------------------------------------|---------------------|
|                           | Total n (%) <sup>^</sup> | Views on treatment n (%)              | Involved in decisions n (%) | Side effects explained n (%) | Understand Explanation n (%) | Factor Score M (SD) | Written info on type of cancer n (%)  | Assessment and care plan n (%) | Clinical nurse support n (%) | Written info on side effects n (%) | Factor Score M (SD) |
| <b>Gender</b>             |                          | $\chi^2 = 2.69$                       | $\chi^2 = 1.30$             | $\chi^2 = 0.32$              | $\chi^2 = 0.10$              | $F = 2.15$          | $\chi^2 = 7.88^*$                     | $\chi^2 = 0.23$                | $\chi^2 = 1.05$              | $\chi^2 = 1.46$                    | $F = 2.92$          |
| Female                    | <b>245 (52.7%)</b>       | 147 (63.4%)                           | 149 (63.4%)                 | 156 (65.5%)                  | 234 (97.5%)                  | 1.17 (0.43)         | 163 (70.3%)                           | 73 (36.3%)                     | 157 (71.7%)                  | 199 (86.9%)                        | 1.36 (0.46)         |
| Male                      | <b>273 (47.3%)</b>       | 147 (56.1%)                           | 165 (58.4%)                 | 182 (67.9%)                  | 263 (97.0%)                  | 1.11 (0.43)         | 152 (58.2%)                           | 86 (38.6%)                     | 160 (66.4%)                  | 209 (82.9%)                        | 1.21 (0.48)         |
| <b>Education</b>          |                          | $\chi^2 = 16.61^*$                    | 144 (68.2%)                 | $\chi^2 = 9.70^*$            | $\chi^2 = 0.84$              | $F = 9.24$          | $\chi^2 = 3.00$                       | $\chi^2 = 11.44^*$             | $\chi^2 = 6.39$              | $\chi^2 = 2.65$                    | $F = 7.46^*$        |
| Middle school (yr 10)     | <b>217 (42.3%)</b>       | 146 (70.2%)                           | 41 (55.4%)                  | 155 (73.1%)                  | 205 (96.7%)                  | 1.23 (0.42)         | 141 (68.1%)                           | 85 (47.0%)                     | 141 (75.8%)                  | 176 (86.7%)                        | 1.27 (0.48)         |
| Senior school (yr 12)     | <b>78 (15.1%)</b>        | 39 (53.4%)                            | 117 (55.2%)                 | 41 (53.9%)                   | 76 (98.7%)                   | 1.05 (0.42)         | 44 (57.9%)                            | 17 (28.3%)                     | 47 (64.4%)                   | 55 (78.6%)                         | 1.07 (0.47)         |
| Trade/Tertiary            | <b>218 (42.5%)</b>       | 107 (51.4%)                           | $\chi^2 = 0.06$             | 139 (65.3%)                  | 211 (97.2%)                  | 1.08 (0.42)         | 128 (62.4%)                           | 57 (31.8%)                     | 127 (64.8%)                  | 172 (84.7%)                        | 1.12 (0.46)         |
| <b>&gt; median income</b> |                          | $\chi^2 = 0.03$                       | 182 (59.7%)                 | $\chi^2 = 0.06$              | $\chi^2 = 2.17$              | $F = 0.09$          | $\chi^2 = 0.24$                       | $\chi^2 = 0.44$                | $\chi^2 = 1.46$              | $\chi^2 = 1.66$                    | $F = 0.01$          |
| Yes                       | <b>318 (65.3%)</b>       | 73 (57.5%)                            | 144 (68.2%)                 | 84 (67.2%)                   | 126 (99.2%)                  | 1.14 (0.40)         | 81 (65.3%)                            | 37 (34.9%)                     | 77 (66.4%)                   | 103 (88.8%)                        | 1.17 (0.47)         |
| No                        | <b>169 (34.7%)</b>       | 172 (58.3%)                           | 78 (60.9%)                  | 204 (66.0%)                  | 301 (96.8%)                  | 1.13 (0.44)         | 189 (62.8%)                           | 100 (38.6%)                    | 200 (72.5%)                  | 248 (83.8%)                        | 1.17 (0.48)         |
| <b>Born in Australia</b>  |                          | $\chi^2 = 0.01$                       | $\chi^2 = 0.15$             | $\chi^2 = 0.59$              | $\chi^2 = 1.62$              | $F = 0.18$          | $\chi^2 = 0.55$                       | $\chi^2 = 0.15$                | $\chi^2 = 0.43$              | $\chi^2 = 0.85$                    | $F = 0.02$          |
| Yes                       | <b>413 (80.5%)</b>       | 233 (59.6%)                           | 238 (60.3%)                 | 261 (65.6%)                  | 387 (96.8%)                  | 1.32 (0.44)         | 246 (63.2%)                           | 127 (38.0%)                    | 248 (69.5%)                  | 322 (85.4%)                        | 1.17 (0.48)         |
| No                        | <b>100 (19.5%)</b>       | 58 (59.8%)                            | 63 (62.4%)                  | 71 (69.6%)                   | 104 (99.0%)                  | 1.15 (0.42)         | 66 (67.3%)                            | 30 (35.7%)                     | 64 (66.0%)                   | 80 (81.6%)                         | 1.16 (0.45)         |
| <b>Full PHI cover</b>     |                          | $\chi^2 = 0.86$                       | $\chi^2 = 0.44$             | $\chi^2 = 0.10$              | $\chi^2 = 0.96$              | $F = 0.26$          | $\chi^2 = 0.32$                       | $\chi^2 = 0.05$                | $\chi^2 = 3.38$              | $\chi^2 = 0.85$                    | $F = 0.01$          |
| Yes                       | <b>91 (18.5%)</b>        | 55 (64.7%)                            | 56 (64.4%)                  | 57 (65.5%)                   | 85 (98.8%)                   | 1.16 (0.24)         | 55 (67.1%)                            | 27 (36.0%)                     | 48 (60.0%)                   | 73 (88.0%)                         | 1.17 (0.47)         |
| No                        | <b>400 (81.5%)</b>       | 224 (59.3%)                           | 233 (60.5%)                 | 261 (67.3%)                  | 380 (96.9%)                  | 1.37 (0.44)         | 242 (63.7%)                           | 120 (37.4%)                    | 247 (70.6%)                  | 308 (83.9%)                        | 1.17 (0.48)         |
| <b>Cancer Site</b>        |                          | $\chi^2 = 4.97$                       | $\chi^2 = 8.65$             | $\chi^2 = 2.59$              | $\chi^2 = 1.37$              | $F = 2.29^*$        | $\chi^2 = 29.65^*$                    | $\chi^2 = 2.81$                | $\chi^2 = 46.11^*$           | $\chi^2 = 17.43^*$                 | $F = 8.03^*$        |
| Breast                    | <b>100 (19.3%)</b>       | 65 (68.4%)                            | 66 (68.0%)                  | 60 (61.9%)                   | 97 (98.0%)                   | 1.23 (0.43)         | 78 (80.4%)                            | 33 (41.3%)                     | 87 (92.6%)                   | 84 (92.3%)                         | 1.36 (0.39)         |
| Skin                      | <b>65 (12.6%)</b>        | 38 (59.4%)                            | 32 (50.8%)                  | 39 (61.9%)                   | 62 (95.4%)                   | 1.05 (0.46)         | 29 (44.6%)                            | 19 (34.5%)                     | 27 (48.2%)                   | 43 (69.4%)                         | 0.97 (0.54)         |
| Head & Neck               | <b>74 (14.3%)</b>        | 39 (54.2%)                            | 48 (66.7%)                  | 51 (68.9%)                   | 71 (97.3%)                   | 1.14 (0.42)         | 37 (52.9%)                            | 26 (44.8%)                     | 39 (66.1%)                   | 60 (85.7%)                         | 1.16 (0.48)         |
| Prostate                  | <b>64 (12.3%)</b>        | 38 (62.3%)                            | 43 (67.2%)                  | 43 (68.3%)                   | 62 (98.4%)                   | 1.20 (0.41)         | 47 (75.8%)                            | 20 (37.7%)                     | 47 (81.0%)                   | 49 (80.3%)                         | 1.25 (0.45)         |
| Other                     | <b>215 (41.5%)</b>       | 114 (56.4%)                           | 116 (56.3%)                 | 145 (69.4%)                  | 205 (97.2%)                  | 1.10 (0.24)         | 124 (62.3%)                           | 61 (34.3%)                     | 117 (60.6%)                  | 172 (87.3%)                        | 1.12 (0.46)         |
| <b>TOTAL</b>              | <b>518 (100%)</b>        | 294 (59.5%)                           | 305 (60.8%)                 | 338 (66.8%)                  | 498 (97.3%)                  | 1.14 (0.43)         | 316 (64.0%)                           | 159 (37.5%)                    | 317 (68.9%)                  | 408 (84.8%)                        | 1.17 (0.47)         |

PHI - Private Health Insurance. n (%) = number and percentage of participants in each demographic category responding yes to item, M (SD) = Mean and SD reported for factor scores, ^ valid percent calculated based on non-missing responses to this item, \* =  $p < .05$  (applying family-wise error rate adjustment for multiple  $\chi^2$  tests)

Regional and remote cancer patients' experiences

Table 3 cont. Participant characteristic and responses to NCCI items with chi-square and ANOVA group comparisons.

|                           | Communication and patient involvement |                          |                             |                              |                              | Provision of information and services |                                      |                                |                              |                                    |                     |
|---------------------------|---------------------------------------|--------------------------|-----------------------------|------------------------------|------------------------------|---------------------------------------|--------------------------------------|--------------------------------|------------------------------|------------------------------------|---------------------|
|                           | Total n (%)                           | Views on treatment n (%) | Involved in decisions n (%) | Side effects explained n (%) | Understand explanation n (%) | Factor Score M (SD)                   | Written info on type of cancer n (%) | Assessment and care plan n (%) | Clinical nurse support n (%) | Written info on side effects n (%) | Factor Score M (SD) |
| <b>SEIFA Quintile</b>     |                                       | $\chi^2 = 5.29$          | $\chi^2 = 3.45$             | $\chi^2 = 4.04$              | $\chi^2 = 4.59$              | $F = 0.61$                            | $\chi^2 = 1.30$                      | $\chi^2 = 0.90$                | $\chi^2 = 5.58$              | $\chi^2 = 2.64$                    | $F = 0.41$          |
| 1 <sup>st</sup> (lowest)  | <b>185 (36.0%)</b>                    | 115 (64.2%)              | 110 (60.8%)                 | 129 (71.3%)                  | 180 (98.4%)                  | 1.17 (0.43)                           | 113 (63.8%)                          | 56 (37.3%)                     | 118 (71.1%)                  | 154 (88.0%)                        | 1.20 (0.46)         |
| 2 <sup>nd</sup>           | <b>155 (30.3%)</b>                    | 89 (60.5%)               | 93 (61.2%)                  | 99 (65.6%)                   | 147 (96.1%)                  | 1.12 (0.45)                           | 98 (65.8%)                           | 49 (38.9%)                     | 90 (65.7%)                   | 122 (82.4%)                        | 1.16 (0.49)         |
| 3 <sup>rd</sup>           | <b>112 (21.9%)</b>                    | 59 (57.3%)               | 59 (56.75)                  | 65 (60.2%)                   | 105 (95.5%)                  | 1.09 (0.44)                           | 66 (63.5%)                           | 36 (40.9%)                     | 71 (72.4%)                   | 82 (83.7%)                         | 1.17 (0.49)         |
| 4 <sup>th</sup>           | <b>54 (10.6%)</b>                     | 25 (47.2%)               | 37 (69.8%)                  | 37 (68.5%)                   | 54 (100.0%)                  | 1.12 (0.39)                           | 32 (59.3%)                           | 17 (34.7%)                     | 31 (64.6%)                   | 42 (82.4%)                         | 1.13 (0.48)         |
| 5 <sup>th</sup> (highest) | <b>5 (1.0%)</b>                       | 3 (60.0%)                | 2 (40.0%)                   | 3 (60.0%)                    | 5 (100.0%)                   | 1.04 (0.43)                           | 4 (80.0%)                            | 1 (25.0%)                      | 1 (25.0%)                    | 3 (75.0%)                          | 1.02 (0.041)        |
| <b>ARIA</b>               |                                       | $\chi^2 = 5.22$          | $\chi^2 = 3.35$             | $\chi^2 = 4.55$              | $\chi^2 = 2.66$              | $F = 0.48$                            | $\chi^2 = 0.99$                      | $\chi^2 = 4.67$                | $\chi^2 = 2.47$              | $\chi^2 = 0.94$                    | $F = 0.99$          |
| Major city                | <b>24 (4.7%)</b>                      | 9 (37.5%)                | 14 (58.3%)                  | 13 (54.2%)                   | 24 (100.0%)                  | 1.03 (0.44)                           | 17 (70.8%)                           | 10 (41.7%)                     | 14 (63.6%)                   | 20 (90.9%)                         | 1.17 (0.46)         |
| Inner regional            | <b>225 (44.0%)</b>                    | 128 (60.7%)              | 140 (63.6%)                 | 154 (70.3%)                  | 216 (97.3%)                  | 1.15 (0.38)                           | 139 (64.7%)                          | 61 (33.5%)                     | 133 (68.6%)                  | 177 (83.5%)                        | 1.16 (0.44)         |
| Outer regional            | <b>217 (42.5%)</b>                    | 128 (61.0%)              | 125 (60.4%)                 | 140 (65.7%)                  | 207 (96.3%)                  | 1.12 (0.47)                           | 129 (62.3%)                          | 76 (43.4%)                     | 134 (68.0%)                  | 172 (85.1%)                        | 1.19 (0.52)         |
| Remote                    | <b>23 (4.5%)</b>                      | 13 (61.9%)               | 12 (54.5%)                  | 14 (66.7%)                   | 23 (100.0%)                  | 1.14 (0.44)                           | 13 (61.9%)                           | 7 (38.9%)                      | 14 (66.7%)                   | 16 (84.2%)                         | 1.17 (0.50)         |
| Very remote               | <b>22 (4.3%)</b>                      | 13 (61.9%)               | 10 (45.5%)                  | 12 (54.5%)                   | 21 (100.0%)                  | 1.08 (0.43)                           | 15 (68.2%)                           | 5 (27.8%)                      | 16 (84.2%)                   | 18 (85.7%)                         | 1.18 (0.48)         |

n(%) = number and percentage of participants in each area-level category responding yes to item, M (SD) = Mean and SD reported for factor scores, \* = p < .05 (applying family-wise error rate adjustment)



Running head: REGIONAL AND REMOTE CANCER PATIENTS EXPERIENCES

### Communication and patient involvement

Participants reported that their views were taken into account when their team of doctors and nurses were discussing their treatment 59.5% of the time (Table 3). Those with middle school education or lower were twice as likely to report having their views taken into account in treatment decisions (OR = 2.22, CI = 1.49 – 3.33) compared to those with senior high school or trade/tertiary level education. Older patients were slightly more likely to report that their views were taken into account by doctors and nurses when deciding on treatment ( $r = .11, p = .02$ ). Similarly, 60.8% of participants felt they were involved in decisions about their care and treatment as much as they would have liked, however, this did not vary according to individual characteristics.

Most participants reported understanding the explanation of “what was wrong with them” upon diagnosis (97.3%) and this did not differ significantly according to individual characteristics. More than half of the patients (66.8%) reported that the possible side-effects of their treatment were explained to them in a way they could understand. Those with middle school education or lower were 1.5 times more likely to report having side effects explained to them in a way that they understood compared to those with trade/tertiary level education (OR = 1.50, CI = 1.14 – 1.96) and those with senior level education were less likely to report this compared to those with trade/tertiary level education (OR = 0.65, CI = 0.46 – 0.90).

Group differences were evident in participants’ scores on the communication and patient involvement factor with patients possessing middle school level education (M = 1.23, SD = 0.42) reporting higher scores than those with trade/tertiary level education (M = 1.08, SD = 0.42),  $t(509) = 42.75, p < .001, d = 0.36$ , or those with senior school level education (M = 1.05, SD = 0.42),  $t(509) = 21.88, p < .001, d = 0.43$ . When compared with all other cancer types, patients with breast (M = 1.23, SD = 0.43),  $t(512) = 28.75, p < .001, d = 0.28$ , and prostate (M = 1.20, SD = 0.41),  $t(512) = 22.40, p < .001, d = 0.17$  cancer reported higher

## Regional and remote cancer patients' experiences

scores on the communication and patient involvement factor, while those with skin (M = 1.05, SD = 0.46),  $t(512) = 19.75, p < .001, d = 0.22$  and head and neck (M = 1.14, SD = 0.42),  $t(512) = 22.83, p < .001, d = 0.01$  cancers reported lower scores than those with other cancer types.

## Provision of information and services

Sixty-four percent of participants were given written information about the type of cancer they had. Females were 1.69 (CI = 1.16 – 2.46) times as likely to report receiving this information when compared to males. Patients with breast cancer were 2.41 (CI = 1.39 – 4.42) times more likely, and those with skin cancer were 0.49 (CI = 0.28 – 1.18) times as likely to receive written information about the type of cancer they had compared to those with other cancers. The majority of patients reported being given written information about the side effects of treatment (84.8%) with those with skin cancer less likely to receive this information compared to those with other cancer types 0.33 (CI= 0.17 – 0.65).

Only 37.5% of participants reported receiving a written assessment and care plan. Those with middle school education or lower were almost two times more likely to report receiving an assessment and care plan (OR = 1.90, CI = 1.23 – 2.91) compared to those with senior high school or trade/tertiary level education. Over two thirds of patients reported being given the name of a clinical nurse specialist to support them through treatment (68.9%), however, patients with breast cancer were 8.07 (CI = 3.55 – 18.37) times more likely, and patients with prostate cancer patients were 2.77 (CI = 1.36– 5.68) times more likely, to be offered this service compared to participants with other types of cancer.

Those with middle school level education or lower (M = 1.27, SD = 0.48) reported higher scores on the provision of service and information factor than those with trade/tertiary level education (M = 1.12, SD = 0.47),  $t(509) = 39.71, p < .001, d = 0.32$  or those with senior school level education (M = 1.07, SD = 0.46),  $t(509) = 20.28, p < .001, d = 0.42$ . When compared with all other cancer types, patients with breast (M = 1.36, SD = 0.39),  $t(99) = 18$

## Regional and remote cancer patients' experiences

34.47,  $p < .001$ ,  $d = 0.54$  or prostate ( $M = 1.25$ ,  $SD = 0.45$ ),  $t(63) = 22.42$ ,  $p < .001$ ,  $d = 0.19$  cancer reported higher scores on the provision of information and services factor, while those with skin ( $M = 0.97$ ,  $SD = 0.54$ ),  $t(64) = 14.52$ ,  $p < .001$ ,  $d = 0.46$  or head and neck ( $M = 1.16$ ,  $SD = 0.48$ ),  $t(73) = 20.73$ ,  $p < .001$ ,  $d = 0.03$  cancers reported lower scores than those with other cancer types. Area-level characteristics (i.e., remoteness or SEIFA) were not significantly associated with single items or factor scores reflecting provision of information and services (see [Table 3](#)). Mean levels of physical QoL ( $F(4) = 5.94$ ,  $p < .001$ ), anxiety ( $F(4) = 3.42$ ,  $p = .009$ ), physical and daily living ( $F(4) = 5.02$ ,  $p < .001$ ) and sexuality ( $F(4) = 3.34$ ,  $p = .010$ ), supportive care needs were significant different across cancer types. Post hoc comparisons with a Bonferroni adjustment showed that breast cancer survivors ( $M = 4.48$ ,  $SD = 4.10$ ) reported significantly lower levels of anxiety than those in the 'other' cancer group ( $M = 6.63$ ,  $SD = 5.94$ ),  $p = .015$  and those with prostate cancer ( $M = .50$ ,  $SD = .68$ ) and breast cancer ( $M = .59$ ,  $SD = .68$ ) reported lower physical and daily living supportive care needs than those in the 'other' cancer group ( $M = .89$ ,  $SD = .82$ ),  $p = .004$  and  $p = .012$  respectively. Those with prostate cancer ( $M = .64$ ,  $SD = .92$ ) also reported significantly higher sexuality supportive care needs than those with skin ( $M = .29$ ,  $SD = .60$ ),  $p = .039$  or head and neck cancer ( $M = .28$ ,  $SD = .61$ ),  $p = .020$  and those with breast ( $M = 75.73$ ,  $SD = 10.25$ ) and prostate cancer ( $M = 70.88$ ,  $SD = 10.81$ ) report significantly higher physical QoL compared to those in the 'other' cancer group ( $M = 70.88$ ,  $SD = 10.81$ ), both  $p < .001$ .

## Associations between NCCI factor scores and health and psychosocial variables

Both communication and patient involvement and provision of information and services factors shared significant positive associations with QoL, satisfaction with health care and constructed meaning (see [Figure 2](#)). They were also both associated with lower supportive care needs in most cases, the strongest associations being with health system and information needs. The communication and patient involvement factor was moderately associated with greater psychosocial QoL ( $r = .30$ ,  $p < .001$ ) and satisfaction with healthcare

## Regional and remote cancer patients' experiences

( $r = .29, p < .001$ ) as well as lower levels of unmet 'health systems and information' ( $r = -.39, p < .001$ ). and 'patient care' ( $r = .35, p < .001$ ) needs and lower cancer threat appraisal ( $r = .31, p < .001$ ). The provision of information and services factor had a weaker pattern of associations though still moderately predicted lower levels of unmet 'health systems and information' ( $r = -.32, p < .001$ ) and 'patient care' ( $r = -.23, p < .001$ ) needs as well as greater satisfaction with healthcare ( $r = .23, p < .001$ ). The communication and patient involvement factor shared significantly stronger associations with higher psychosocial QoL ( $z = 2.03, p = .042$ ), and lower levels of unmet need in terms of psychosocial support ( $z = 2.05, p = .040$ ) and patient care ( $z = 2.00, p = .046$ ). Communication and patient involvement was associated with lower stress and anxiety, while provision of information and services was not (see [Figure 2](#)).

Area-level characteristics (i.e., remoteness or SEIFA) were not significantly associated with single items or scores on either NCCI factor (see [Table 3](#)).

## DISCUSSION

The goal of delivering equitable patient-centered cancer care is a corner stone of cancer control plans and care guidelines. (6,7,9,12) The present study suggests that the NCCI patient experience indicators have validity and potential as a tool for monitoring and benchmarking the quality of cancer care relating specifically to patient understanding and involvement. Importantly, this brief tool discriminated between different aspects of patient experience for those dislocated from their home during treatment and identified characteristics associated with a poorer experience. While it was almost universal for patients to recall understanding the explanation of their treatment, and most people reported that treatment side effects were explained and supported with written information, only a minority received a written assessment and care plan. Further, patient experience varied by clinical and sociodemographic characteristics suggesting that there is work to be done on better understanding what influences care, and how we might intervene.

## Regional and remote cancer patients' experiences

From a construct perspective, the patient experience as measured by the NCCI indicators presented along two key dimensions: 1) communication and patient involvement and 2) provision of information and services. For both dimensions, the strong association with health system and information needs provides evidence of convergent validity. The closer connection between communication and patient involvement and QoL and psychosocial outcomes intuitively makes sense given the important role of the interpersonal relationships between the health care teams and patients, as well as the self-efficacy and personal agency that evolves from patient's involvement in their health care. (31) These associations may be bi-directional. Patients with lower psychological distress have a higher capacity to absorb information, take part in decision making, benefit from communications with healthcare professionals (32,33) and are subsequently more likely to report satisfaction with this element of their care. (34) In fact this may be reflected in the current findings that breast cancer patients in this sample reported both lower levels of anxiety and better patient experiences compared to those with other cancers. Those individuals who are psychologically vulnerable or have poorer QoL likely need stepped up care to achieve optimal outcomes. (35)

Despite suggestions that remote living is associated with poorer experiences for cancer survivors, area level factors were not associated with NCCI outcomes. Rather, differences in patient experiences according to cancer were apparent. Notably, breast and prostate cancer patients were more likely to receive clinical nurse support compared to skin and head and neck cancer patients. This may reflect the different resources and services available for specific cancers, for example, the introduction of the specialist nurse role for breast cancer patients, (36) and more recently prostate cancer patients. (37) While a specialist nurse appears to greatly enhance patient experience, (38) providing this for all cancer types is likely a resourcing challenge especially for regional and remote health services. Models that incorporate telehealth and that span broadly across multiple cancer types or chronic disease may be needed. (39) Higher education appeared to be associated

21

## Regional and remote cancer patients' experiences

with less communication and patient involvement and information and services. The reasons for this are unclear however it may be that health professionals assume these patients require less support or alternatively that people with more education have greater expectations in this domain of care.

As the aim of the present study was to provide specific insight into the experiences of regional and remote cancer patients, caution should be in applied in generalising these findings to urbanised populations. Since the survey is cross-sectional we cannot assume causality; and the data is self-reported and was not able to be verified by observational data or care records. However, this large, representative sample was recruited from a statewide jurisdiction and so likely represents the actual experience of patients from regional and remote Australia. Although regional and remote areas tend to be marked by higher socio-economic disadvantage in Australia (23), the particularly low SES status of this sample may be due to recruiting participants through free or low-cost accommodation services. Low levels of variance in area-level disadvantage in this sample may have impeded the detection of significant effects. These alternative hypotheses should be the subject of future research with samples not in receipt of such services. Although the aim of the current research was to assess patient experiences using a metric published by a National governing body, it is important to note that several valid measures of patient experience covering different aspects of patients' care and support needs exist (10, 11, 29) and future research will benefit from their inclusion.

The present results outline the patient experience for a rural and regional population who are at risk of fragmented or poorly coordinated care. Patients who report better communication with their health care team and more involvement have better QoL, less stress and anxiety, and lower threat. Fulfilling the NCCI indicators connects to lower unmet need in health services and information. Cancer care services that ensure these indicators are

## Regional and remote cancer patients' experiences

met are better placed to provide an optimal cancer experience and improved patient-reported outcomes.

The NCCI presents as a useful and valid tool for assessing the patient experience. The aspect of care that appears most crucial is communication and involvement with the health care team. Strategies to optimize this for regional and remote patients need to be a cancer control priority.

For peer review only

Regional and remote cancer patients' experiences

**Figure Captions:**

Figure 1. Recruitment flowchart

Figure 2. Visual comparison of the correlation co-efficients between each health/psychosocial variable and each factor.

For peer review only



1 Regional and remote cancer patients' experiences  
2

3 **Declarations**  
4

5 **Author Contribution Statement**  
6

7 JD, BG, JFA, SM, FCW, MJI, NR, LZ, AR, & SKC contributed to the study conception and  
8 design. Material preparation and data collection were conducted by BG, FCW, AR, & LZ and  
9 analyses were performed by BG and MJI. The first draft of the manuscript was written by JD  
10 and SKC and JD, BG, JFA, SM, FCW, MJI, NR, LZ, AR, & SKC provided substantial  
11 contributions in revising the manuscript and approved the final manuscript.  
12  
13  
14  
15  
16  
17

18 **Competing interests**  
19

20 The authors declare that they have no competing interests.  
21  
22

23 **Funding**  
24

25 The study was funded by The University of Southern Queensland and Cancer Council  
26 Queensland. Award/Grant number is not applicable.  
27  
28  
29

30 **Data sharing statement**  
31

32 The data that support the findings of this study are available from the corresponding author  
33 upon reasonable request.  
34  
35  
36

37 **Ethical Approval**  
38

39 The questionnaire and methodology for this study was approved by the Human Research  
40 Ethics committee of the University of Southern Queensland (Ethics approval number: ref.  
41 H17REA152).  
42  
43  
44  
45

46 **Consent to participate**  
47

48 Informed consent was obtained from all individual participants included in the study.  
49  
50  
51  
52  
53  
54  
55  
56  
57  
58  
59  
60

## Regional and remote cancer patients' experiences

**References**

1. Bray F, Ferlay J, Soerjomataram I, Siegel RL, Torre LA, Jemal A. Global cancer statistics 2018: GLOBOCAN estimates of incidence and mortality worldwide for 36 cancers in 185 countries. *CA Cancer J Clin*. 2018;68(6):394–424.
2. Dasgupta P, Baade PD, Aitken JF, Ralph N, Chambers SK, Dunn J. Geographical variations in prostate cancer outcomes: a systematic review of international evidence. *Front Oncol*. 2019;9:238.
3. Alfano CM, Jefford M, Maher J, Birken SA, Mayer DK. Building personalized cancer follow-up care pathways in the United States: lessons learned from implementation in England, Northern Ireland, and Australia. *Am Soc Clin Oncol Educ Book*. 2019;39:625–39.
4. Ellison EC, Pawlik TM, Way DP, Satiani B, Williams TE. The impact of the aging population and incidence of cancer on future projections of general surgical workforce needs. *Surgery*. 2018;163(3):553–9.
5. Jakka S, Rossbach M. An economic perspective on personalized medicine. *HUGO J* [Internet]. 2013 Dec [cited 2020 Apr 20];7(1). Available from: <https://www.ncbi.nlm.nih.gov/pmc/articles/PMC4685168/>
6. National Health Service, UK. Innovation to implementation: Stratified pathways of care for people living with or beyond cancer A 'how to guide' [Internet]. 2016. Available from: <https://www.england.nhs.uk/wp-content/uploads/2016/04/stratified-pathways-update.pdf>
7. Australian Government, Department of Health. Optimal Cancer Care Pathways (OCPs) [Internet]. 2018. Available from: <https://www1.health.gov.au/internet/main/publishing.nsf/Content/occp>
8. Ganz PA, Balogh E. Delivering High-Quality Cancer Care: Charting a new course for a system in crisis. Wash DC Inst Med Natl Acad. 2013;
9. Bao H, Yang F, Su S, Wang X, Zhang M, Xiao Y, et al. Evaluating the effect of clinical care pathways on quality of cancer care: analysis of breast, colon and rectal cancer pathways. *J Cancer Res Clin Oncol*. 2016 May 1;142(5):1079–89.
10. Department of Health. National Cancer Patient Experience Survey 2018. National Results Summary [Internet]. National Health Service, United Kingdom; 2018. Available from: [https://assets.publishing.service.gov.uk/government/uploads/system/uploads/attachment\\_data/file/216682/dh\\_122520.pdf](https://assets.publishing.service.gov.uk/government/uploads/system/uploads/attachment_data/file/216682/dh_122520.pdf)
11. State of Victoria, Department of Health and Human Services. Understanding care experiences of people with cancer. Findings from pilot study 2 [Internet]. Victorian Government; 2016. Available from: <file:///C:/Users/bella/Downloads/Technical%20paper%20-%20Patient%20experience%20survey.pdf>
12. Cancer Australia, Australian Government. National Cancer Control Indicators. [Internet]. 2019. Available from: <https://ncci.canceraustralia.gov.au/>

## Regional and remote cancer patients' experiences

13. Wilkes LM, White K, Mohan S, Beale B. Accessing metropolitan cancer care services: practical needs of rural families. *J Psychosoc Oncol*. 2006;24(2):85–101.
14. Ireland MJ, March S, Crawford-Williams F, Cassimatis M, Aitken JF, Hyde MK, et al. A systematic review of geographical differences in management and outcomes for colorectal cancer in Australia. *BMC Cancer*. 2017;17(1):95.
15. Cancer Council Queensland, Queensland University of Technology, Cooperative Research Centre for Spatial Information. Australian Cancer Atlas Version 09-2018. Accessed [give date] [Internet]. 2018 [cited 2018 Dec 14]. Available from: <https://atlas.cancer.org.au>
16. Weaver KE, Geiger AM, Lu L, Case LD. Rural-urban disparities in health status among US cancer survivors. *Cancer*. 2013;119(5):1050–7.
17. Salehi A, Frommolt V, Coyne E. Factors affecting provision of care services for patients with cancer living in the rural area: an integrative review. *Aust J Cancer Nurs*. 2019;20(1).
18. Butow PN, Phillips F, Schweder J, White K, Underhill C, Goldstein D. Psychosocial well-being and supportive care needs of cancer patients living in urban and rural/regional areas: a systematic review. *Support Care Cancer*. 2012;20(1):1–22.
19. Burris JL, Andrykowski M. Disparities in mental health between rural and nonrural cancer survivors: a preliminary study. *Psycho-Oncol J Psychol Soc Behav Dimens Cancer*. 2010;19(6):637–45.
20. Beesley V, Eakin E, Steginga S, Aitken J, Dunn J, Battistutta D. Unmet needs of gynaecological cancer survivors: implications for developing community support services. *Psycho-Oncol J Psychol Soc Behav Dimens Cancer*. 2008;17(4):392–400.
21. Pateman KA, Cockburn NL, Batstone MD, Ford PJ. Quality of life of head and neck cancer patients in urban and regional areas: An Australian perspective. *Aust J Rural Health*. 2018;26(3):157–64.
22. Australian Bureau of Statistics. Australian Statistical Geography Standard (ASGS): Correspondences. Cat. No. 1270.0.55.006. [Internet]. Canberra: ABS; 2011. Available from: <https://www.abs.gov.au/AUSSTATS/abs@.nsf/DetailsPage/1270.0.55.006July%202011?OpenDocument> [Accessed 7 November 2019].
23. Australian Bureau of Statistics. ABS.Stat SEIFA by Local Government Area (LGA). [Internet]. Canberra: ABS; 2011. Available from: [http://stat.data.abs.gov.au/Index.aspx?DataSetCode=ABS\\_SEIFA\\_LGA](http://stat.data.abs.gov.au/Index.aspx?DataSetCode=ABS_SEIFA_LGA). [Accessed 7 November 2019].
24. Muthén Linda K, Muthén Bengt O. Mplus user's guide. Los Angel Muthen Muthen. 2007;
25. Antony MM, Bieling PJ, Cox BJ, Enns MW, Swinson RP. Psychometric properties of the 42-item and 21-item versions of the Depression Anxiety Stress Scales in clinical groups and a community sample. *Psychol Assess*. 1998;10(2):176.

## Regional and remote cancer patients' experiences

26. Gomez F. A guide to the depression, anxiety and stress scale (DASS 21). Cent East Syd Prim Health Netw. 2016;
27. Fife BL. The measurement of meaning in illness. *Soc Sci Med*. 1995;40(8):1021–8.
28. Richardson J, Sinha K, Iezzi A, Khan M. Modelling the utility of health states with the Assessment of Quality of Life (AQoL) 8D instrument: overview and utility scoring algorithm. *Res Pap 63 Cent Health Econ*. 2011;
29. Boyes A, Girgis A, Lecathelinais C. Brief assessment of adult cancer patients' perceived needs: development and validation of the 34-item Supportive Care Needs Survey (SCNS-SF34). *J Eval Clin Pract*. 2009;15(4):602–6.
30. Corp. I. IBM SPSS Statistics for Windows, Version 26. Armonk, NY: IBM Corp.; 2019.
31. Prip A, Møller KA, Nielsen DL, Jarden M, Olsen M-H, Danielsen AK. The Patient–Healthcare Professional Relationship and Communication in the Oncology Outpatient Setting: A Systematic Review. *Cancer Nurs*. 2018;41(5):E11.
32. Jansen J, van Weert JC, de Groot J, van Dulmen S, Heeren TJ, Bensing JM. Emotional and informational patient cues: the impact of nurses' responses on recall. *Patient Educ Couns*. 2010;79(2):218–24.
33. van Osch M, Sep M, van Vliet LM, van Dulmen S, Bensing JM. Reducing patients' anxiety and uncertainty, and improving recall in bad news consultations. *Health Psychol*. 2014;33(11):1382.
34. Kane HL, Halpern MT, Squiers LB, Treiman KA, McCormack LA. Implementing and evaluating shared decision making in oncology practice. *CA Cancer J Clin*. 2014;64(6):377–88.
35. Schofield P, Chambers S. Effective, clinically feasible and sustainable: Key design features of psycho-educational and supportive care interventions to promote individualised self-management in cancer care. *Acta Oncol*. 2015;54(5):805–12.
36. Amir Z, Scully J, Borrill C. The professional role of breast cancer nurses in multi-disciplinary breast cancer care teams. *Eur J Oncol Nurs*. 2004;8(4):306–14.
37. Ralph N, Green A, Sara S, McDonald S, Norris P, Terry V, et al. Prostate cancer survivorship priorities for men and their partners: Delphi consensus from a nurse specialist cohort. *J Clin Nurs*. 2020;29(1–2):265–73.
38. Dunn J, Ralph N, Green A, Frydenberg M, Chambers SK. Contemporary consumer perspectives on prostate cancer survivorship: Fifty voices. *Psychooncology*. 2020;29(3):557–63.
39. Lovell NH, Redmond SJ, Basilakis J, Shany T, Celler BG. Telehealth technologies for managing chronic disease-experiences from Australia and the UK. In: 2010 Annual International Conference of the IEEE Engineering in Medicine and Biology. IEEE; 2010. p. 5267–9.

Running head: REGIONAL AND REMOTE CANCER PATIENTS EXPERIENCES

Figure 1. Recruitment flowchart

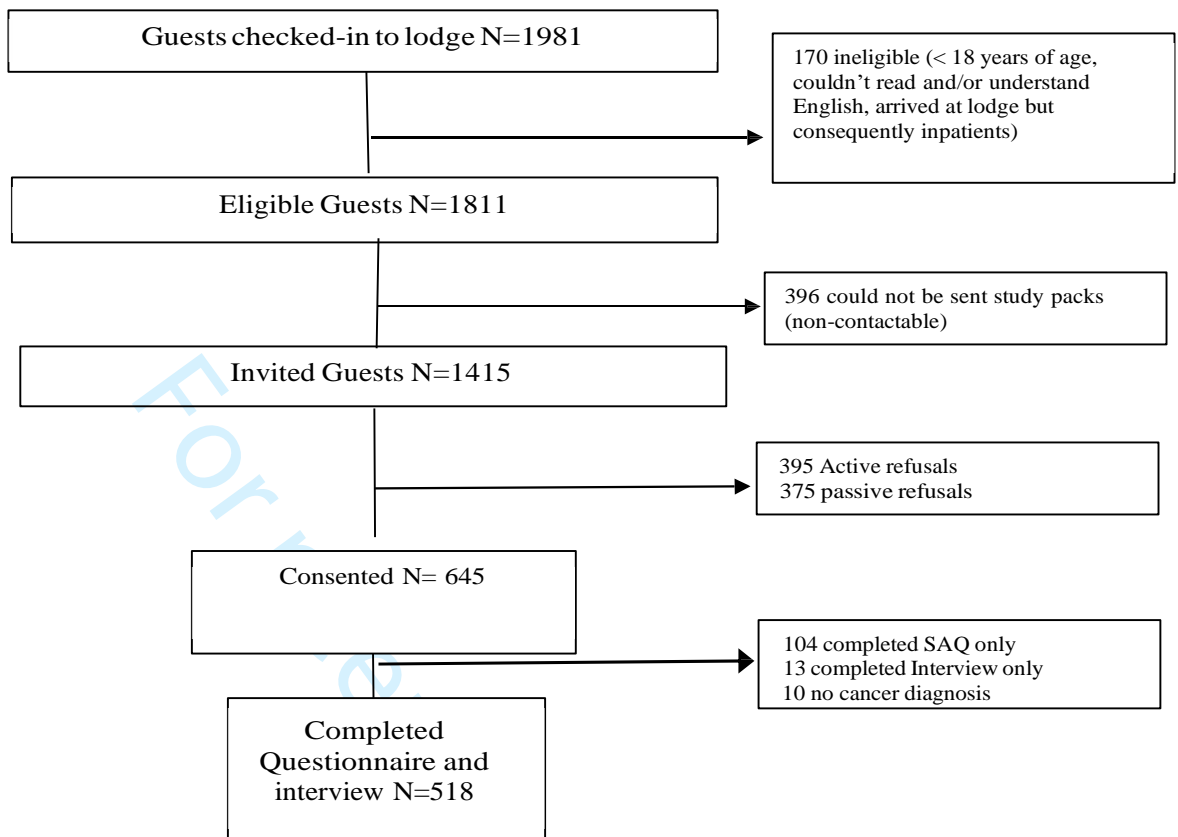

Regional and remote cancer patients' experiences

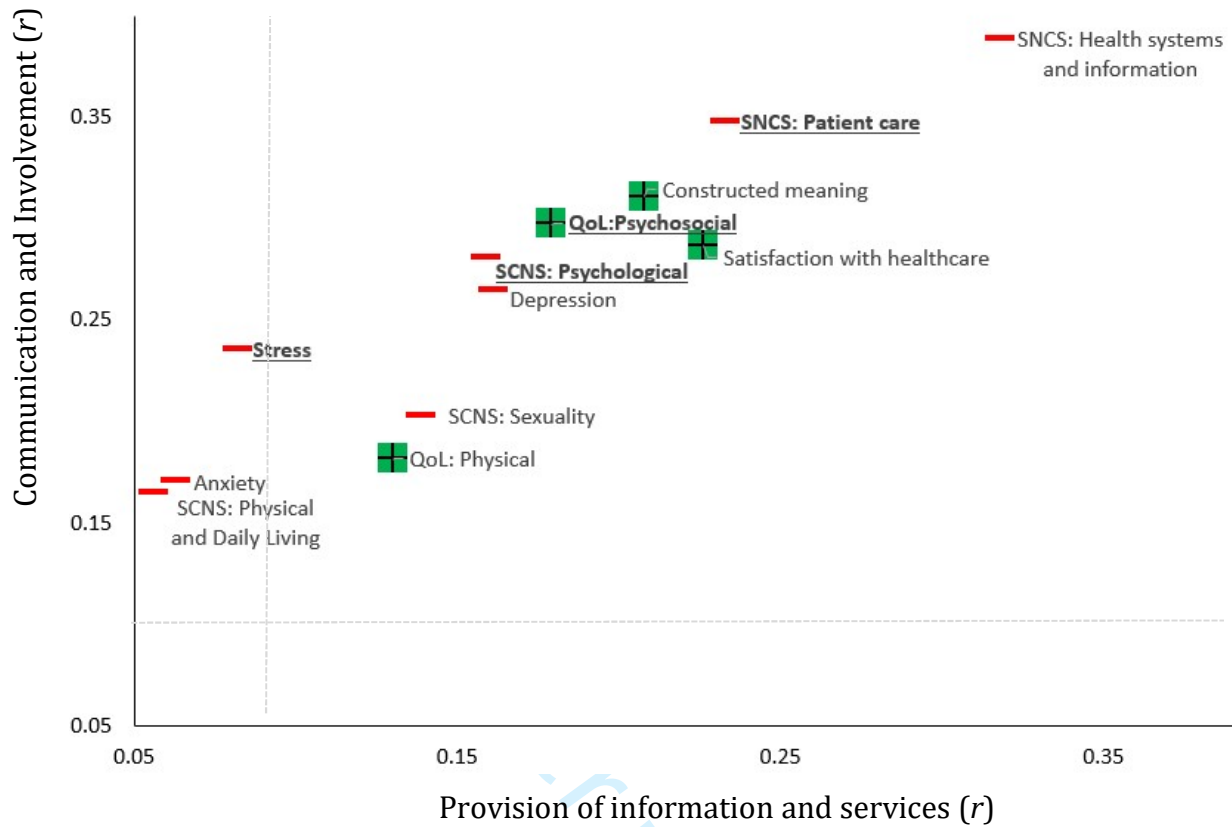

Figure 2. Visual comparison of the correlation co-efficients between each health/psychosocial variable and each factor.

**Applying National Cancer Control Indicators to Regional and Remote Cancer Patients' Experiences** Jeff Dunn, Belinda C Goodwin ([belindagoodwin@cancerqld.org.au](mailto:belindagoodwin@cancerqld.org.au)), Joanne F. Aitken, Sonja March, Fiona Crawford-Williams, Michael J. Ireland, Nicholas Ralph, Leah Zajdlewicz, Arlen Rowe, and Suzanne K. Chambers.  
University of Southern Queensland & Cancer Council Queensland

Supplementary Table 1. Frequencies and percentages<sup>^</sup> of responses to NCCI – Patient Experience Items and grouping of binary responses, n (%).

|                                                                                                         |                                           |                                                |                                                       |                                           |                                     |
|---------------------------------------------------------------------------------------------------------|-------------------------------------------|------------------------------------------------|-------------------------------------------------------|-------------------------------------------|-------------------------------------|
|                                                                                                         | <b>Yes, I completely understood it</b>    | <b>Yes, I understood some of it</b>            | <b>No</b>                                             | <b>I can't remember</b>                   | <b>Missing</b>                      |
| When you were told you had cancer, did you understand the explanation of what was wrong with you?       | 345 (66.7%)                               | 153 (29.4%)                                    | 14 (2.7%)                                             | 5 (1.0%)                                  | 1 (0.19%)                           |
|                                                                                                         | <b>Yes, and it was easy to understand</b> | <b>Yes, and it was difficult to understand</b> | <b>No</b>                                             | <b>I did not need written information</b> | <b>I don't know/ can't remember</b> |
| When you were told you had cancer, were you given written information about the type of cancer you had? | 262 (51.3%)                               | 54 (10.6%)                                     | 134 (26.2%)                                           | 44 (8.6%)                                 | 17 (3/3%)                           |
|                                                                                                         | <b>Yes</b>                                | <b>No</b>                                      | <b>I don't know/ can't remember</b>                   | <b>Missing</b>                            |                                     |
| Have you been offered a written assessment and care plan                                                | 159 (31.0%)                               | 265 (51.7%)                                    | 89 (17.3%)                                            | 5 (1.0%)                                  |                                     |
|                                                                                                         | <b>Yes</b>                                | <b>No</b>                                      | <b>I don't know/ can't remember</b>                   | <b>Missing</b>                            |                                     |
| Were you given the name of a Clinical Nurse Specialist who would support you through your treatment?    | 317 (61.8%)                               | 143 (27.9%)                                    | 53 (10.2%)                                            | 5 (1.0%)                                  |                                     |
|                                                                                                         | <b>Yes, definitely</b>                    | <b>Yes, to some extent</b>                     | <b>No, but I would have liked to be more involved</b> | <b>I don't know/can't remember</b>        | <b>Missing</b>                      |
| Were you involved as much as you wanted to be in decisions about your care and treatment?               | 305 (59.2%)                               | 161 (31.3%)                                    | 36 (6.9%)                                             | 13 (2.5%)                                 | 3 (0.6%)                            |

<sup>^</sup>valid percentage reported except for missing column, calculated based on non-missing data ----- = coded as yes, ----- = coded as no, no border = treated as missing

**Applying National Cancer Control Indicators to Regional and Remote Cancer Patients' Experiences** Jeff Dunn, Belinda C Goodwin ([belindagoodwin@cancerqld.org.au](mailto:belindagoodwin@cancerqld.org.au)), Joanne F. Aitken, Sonja March, Fiona Crawford-Williams, Michael J. Ireland, Nicholas Ralph, Leah Zajdlewicz, Arlen Rowe, and Suzanne K. Chambers.  
 University of Southern Queensland & Cancer Council Queensland

Supplementary Table 1. (Cont.)

|                                                                                                                                                     | Yes, definitely | Yes, to some extent | No         | I didn't know my treatment was being discussed ... | I don't know/ can't remember | Missing  |
|-----------------------------------------------------------------------------------------------------------------------------------------------------|-----------------|---------------------|------------|----------------------------------------------------|------------------------------|----------|
| Do you think your views were taken into account when the team of doctors and nurses caring for you were discussing which treatment you should have? | 294 (57.8%)     | 152 (29.2%)         | 31 (6.1%)  | 17 (2.9%)                                          | 15 (2.8%)                    | 9 (1.7%) |
| Were the possible side effects of treatment(s) explained in a way you could understand?                                                             | 338 (65.5%)     | 136 (26.4%)         | 30 (5.8%)  | 2 (0.4%)                                           | 10 (1.9%)                    | 2 (0.4%) |
| Before you started your treatment, were you given written information about the side effects of treatment(s)?                                       | 354 (69.4%)     | 54 (10.6%)          | 73 (14.3%) | 29 (5.7%)                                          |                              | 8 (1.5%) |

^valid percentage reported except for missing column, calculated based on non-missing data ----- = coded as yes, - - - - - = coded as no, no border = treated as missing

Note: To assess whether time since diagnosis was associated with non-response (i.e., no response or I don't know/ don't remember response), point bi-serial correlations were conducted between non-response and days since diagnosis. One weak association whereby those who were further past diagnosis were less likely to recall/provide a response to the NCCI item "Were you involved as much as you wanted to be in decisions about your care and treatment" ( $r = .130, p = .004$ )



**STROBE 2007 (v4) Statement—Checklist of items that should be included in reports of *cross-sectional studies***

| Section/Topic                | Item # | Recommendation                                                                                                                                                                       | Reported on page # |
|------------------------------|--------|--------------------------------------------------------------------------------------------------------------------------------------------------------------------------------------|--------------------|
| <b>Title and abstract</b>    | 1      | (a) Indicate the study's design with a commonly used term in the title or the abstract                                                                                               | 3                  |
|                              |        | (b) Provide in the abstract an informative and balanced summary of what was done and what was found                                                                                  | 3                  |
| <b>Introduction</b>          |        |                                                                                                                                                                                      |                    |
| Background/rationale         | 2      | Explain the scientific background and rationale for the investigation being reported                                                                                                 | 5,6                |
| Objectives                   | 3      | State specific objectives, including any prespecified hypotheses                                                                                                                     | 6                  |
| <b>Methods</b>               |        |                                                                                                                                                                                      |                    |
| Study design                 | 4      | Present key elements of study design early in the paper                                                                                                                              | 7                  |
| Setting                      | 5      | Describe the setting, locations, and relevant dates, including periods of recruitment, exposure, follow-up, and data collection                                                      | 7                  |
| Participants                 | 6      | (a) Give the eligibility criteria, and the sources and methods of selection of participants                                                                                          | 7                  |
| Variables                    | 7      | Clearly define all outcomes, exposures, predictors, potential confounders, and effect modifiers. Give diagnostic criteria, if applicable                                             | 7-13               |
| Data sources/<br>measurement | 8*     | For each variable of interest, give sources of data and details of methods of assessment (measurement). Describe comparability of assessment methods if there is more than one group | 7-13               |
| Bias                         | 9      | Describe any efforts to address potential sources of bias                                                                                                                            | 13 & 23            |
| Study size                   | 10     | Explain how the study size was arrived at                                                                                                                                            | 7                  |
| Quantitative variables       | 11     | Explain how quantitative variables were handled in the analyses. If applicable, describe which groupings were chosen and why                                                         | 13                 |
| Statistical methods          | 12     | (a) Describe all statistical methods, including those used to control for confounding                                                                                                | 13                 |
|                              |        | (b) Describe any methods used to examine subgroups and interactions                                                                                                                  | 13                 |
|                              |        | (c) Explain how missing data were addressed                                                                                                                                          | 14                 |
|                              |        | (d) If applicable, describe analytical methods taking account of sampling strategy                                                                                                   | -                  |
|                              |        | (e) Describe any sensitivity analyses                                                                                                                                                | -                  |
| <b>Results</b>               |        |                                                                                                                                                                                      |                    |

|                          |     |                                                                                                                                                                                                              |                  |
|--------------------------|-----|--------------------------------------------------------------------------------------------------------------------------------------------------------------------------------------------------------------|------------------|
| Participants             | 13* | (a) Report numbers of individuals at each stage of study—eg numbers potentially eligible, examined for eligibility, confirmed eligible, included in the study, completing follow-up, and analysed            | 7 (figure)       |
|                          |     | (b) Give reasons for non-participation at each stage                                                                                                                                                         | 7 (figure)       |
|                          |     | (c) Consider use of a flow diagram                                                                                                                                                                           | 7 (figure)       |
| Descriptive data         | 14* | (a) Give characteristics of study participants (eg demographic, clinical, social) and information on exposures and potential confounders                                                                     | 14               |
|                          |     | (b) Indicate number of participants with missing data for each variable of interest                                                                                                                          | 15 – 16 (tables) |
| Outcome data             | 15* | Report numbers of outcome events or summary measures                                                                                                                                                         | 15 – 16 (tables) |
| Main results             | 16  | (a) Give unadjusted estimates and, if applicable, confounder-adjusted estimates and their precision (eg, 95% confidence interval). Make clear which confounders were adjusted for and why they were included | -                |
|                          |     | (b) Report category boundaries when continuous variables were categorized                                                                                                                                    | 15-16            |
|                          |     | (c) If relevant, consider translating estimates of relative risk into absolute risk for a meaningful time period                                                                                             | -                |
| Other analyses           | 17  | Report other analyses done—eg analyses of subgroups and interactions, and sensitivity analyses                                                                                                               | 18-20            |
| <b>Discussion</b>        |     |                                                                                                                                                                                                              |                  |
| Key results              | 18  | Summarise key results with reference to study objectives                                                                                                                                                     | 21               |
| Limitations              | 19  | Discuss limitations of the study, taking into account sources of potential bias or imprecision. Discuss both direction and magnitude of any potential bias                                                   | 22               |
| Interpretation           | 20  | Give a cautious overall interpretation of results considering objectives, limitations, multiplicity of analyses, results from similar studies, and other relevant evidence                                   | 21,22            |
| Generalisability         | 21  | Discuss the generalisability (external validity) of the study results                                                                                                                                        | 22               |
| <b>Other information</b> |     |                                                                                                                                                                                                              |                  |
| Funding                  | 22  | Give the source of funding and the role of the funders for the present study and, if applicable, for the original study on which the present article is based                                                | 2                |

\*Give information separately for cases and controls in case-control studies and, if applicable, for exposed and unexposed groups in cohort and cross-sectional studies.

**Note:** An Explanation and Elaboration article discusses each checklist item and gives methodological background and published examples of transparent reporting. The STROBE checklist is best used in conjunction with this article (freely available on the Web sites of PLoS Medicine at <http://www.plosmedicine.org/>, Annals of Internal Medicine at <http://www.annals.org/>, and Epidemiology at <http://www.epidem.com/>). Information on the STROBE Initiative is available at [www.strobe-statement.org](http://www.strobe-statement.org).
