# Supplementary material for: Are National Cancer Control Indicators for patient experiences being met in regional and remote Australia? A cross-sectional study of cancer survivors who travelled for treatment
Source: PubMed Central journal article supplement — BMJ Open. 2021 Feb 22;11(2):e042507. doi: 10.1136/bmjopen-2020-042507 (PMC7903096; doi:10.1136/bmjopen-2020-042507), 2021-02-22
Supplement: bmjopen-2020-042507supp001.pdf [file bmjopen-2020-042507supp001.pdf]

**Applying National Cancer Control Indicators to Regional and Remote Cancer Patients' Experiences** Jeff Dunn, Belinda C Goodwin ([belindagoodwin@cancerqld.org.au](mailto:belindagoodwin@cancerqld.org.au)), Joanne F. Aitken, Sonja March, Fiona Crawford-Williams, Michael J. Ireland, Nicholas Ralph, Leah Zajdlewicz, Arlen Rowe, and Suzanne K. Chambers.

University of Southern Queensland & Cancer Council Queensland

Supplementary Table 1. Frequencies and percentages<sup>^</sup> of responses to NCCI – Patient Experience Items and grouping of binary responses, n (%).

|                                                                                                         |                                                          |                                                              |                                                                    |                                                        |                                                  |                            |
|---------------------------------------------------------------------------------------------------------|----------------------------------------------------------|--------------------------------------------------------------|--------------------------------------------------------------------|--------------------------------------------------------|--------------------------------------------------|----------------------------|
| When you were told you had cancer, did you understand the explanation of what was wrong with you?       | <b>Yes, I completely understood it</b><br>345 (66.7%)    | <b>Yes, I understood some of it</b><br>153 (29.4%)           | <b>No</b><br>14 (2.7%)                                             | <b>I can't remember</b><br>5 (1.0%)                    | <b>Missing</b><br>1 (0.19%)                      |                            |
| When you were told you had cancer, were you given written information about the type of cancer you had? | <b>Yes, and it was easy to understand</b><br>262 (51.3%) | <b>Yes, and it was difficult to understand</b><br>54 (10.6%) | <b>No</b><br>134 (26.2%)                                           | <b>I did not need written information</b><br>44 (8.6%) | <b>I don't know/ can't remember</b><br>17 (3/3%) | <b>Missing</b><br>7 (1.4%) |
| Have you been offered a written assessment and care plan?                                               | <b>Yes</b><br>159 (31.0%)                                | <b>No</b><br>265 (51.7%)                                     | <b>I don't know/ can't remember</b><br>89 (17.3%)                  |                                                        | <b>Missing</b><br>5 (1.0%)                       |                            |
| Were you given the name of a Clinical Nurse Specialist who would support you through your treatment?    | <b>Yes</b><br>317 (61.8%)                                | <b>No</b><br>143 (27.9%)                                     | <b>I don't know/ can't remember</b><br>53 (10.2%)                  |                                                        | <b>Missing</b><br>5 (1.0%)                       |                            |
| Were you involved as much as you wanted to be in decisions about your care and treatment?               | <b>Yes, definitely</b><br>305 (59.2%)                    | <b>Yes, to some extent</b><br>161 (31.3%)                    | <b>No, but I would have liked to be more involved</b><br>36 (6.9%) | <b>I don't know/can't remember</b><br>13 (2.5%)        | <b>Missing</b><br>3 (0.6%)                       |                            |

<sup>^</sup>valid percentage reported except for missing column, calculated based on non-missing data ----- = coded as yes, - - - - - = coded as no, no border = treated as missing

**Applying National Cancer Control Indicators to Regional and Remote Cancer Patients' Experiences** Jeff Dunn, Belinda C Goodwin ([belindagoodwin@cancerqld.org.au](mailto:belindagoodwin@cancerqld.org.au)), Joanne F. Aitken, Sonja March, Fiona Crawford-Williams, Michael J. Ireland, Nicholas Ralph, Leah Zajdlewicz, Arlen Rowe, and Suzanne K. Chambers.

University of Southern Queensland & Cancer Council Queensland

Supplementary Table 1. (Cont.)

|                                                                                                                                                     | Yes, definitely | Yes, to some extent | No         | I didn't know my treatment was being discussed ... | I don't know/ can't remember | Missing  |
|-----------------------------------------------------------------------------------------------------------------------------------------------------|-----------------|---------------------|------------|----------------------------------------------------|------------------------------|----------|
| Do you think your views were taken into account when the team of doctors and nurses caring for you were discussing which treatment you should have? | 294 (57.8%)     | 152 (29.2%)         | 31 (6.1%)  | 17 (2.9%)                                          | 15 (2.8%)                    | 9 (1.7%) |
| Were the possible side effects of treatment(s) explained in a way you could understand?                                                             | 338 (65.5%)     | 136 (26.4%)         | 30 (5.8%)  | 2 (0.4%)                                           | 10 (1.9%)                    | 2 (0.4%) |
| Before you started your treatment, were you given written information about the side effects of treatment(s)?                                       | 354 (69.4%)     | 54 (10.6%)          | 73 (14.3%) | 29 (5.7%)                                          |                              | 8 (1.5%) |

^valid percentage reported except for missing column, calculated based on non-missing data ----- = coded as yes, ----- = coded as no, no border = treated as missing

Note: To assess whether time since diagnosis was associated with non-response (i.e., no response or I don't know/ don't remember response), point bi-serial correlations were conducted between non-response and days since diagnosis. One weak association whereby those who were further past diagnosis were less likely to recall/provide a response to the NCCI item "Were you involved as much as you wanted to be in decisions about your care and treatment" ( $r = .130, p = .004$ )
